# Supplementary material for: Catalytic asymmetric oxidative sulfenylation of β-ketocarbonyls using a chiral primary amine
Source: Royal Society of Chemistry journal article supplement (doi:10.1039/d1qo01748a), 2022-01-01
Supplement: d1qo01748a1.pdf [file d1qo01748a1.pdf]

## **Catalytic Asymmetric Oxidative Sulfenylation of $\beta$ -Ketocarboxyls by Chiral Primary Amine**

Qi Zhang,<sup>a,b</sup> Mingying Shi,<sup>c</sup> Xueling Mi<sup>c</sup> and Sanzhong Luo<sup>\*,d</sup>

<sup>a</sup> Key Laboratory of Molecular Recognition and Function, Institute of Chemistry, Chinese Academy of Sciences, Beijing 100190, China

<sup>b</sup> School of Chemical Science, University of Chinese Academy of Sciences, Beijing 100490, China

<sup>c</sup> College of Chemistry, Beijing Normal University, Beijing 100875

<sup>d</sup> Center of Basic Molecular Science, Department of Chemistry, Tsinghua University, Beijing, 100084, China

## Table of Contents

|                                                  |     |
|--------------------------------------------------|-----|
| 1. General information and materials.....        | S2  |
| 2. Reaction condition optimization.....          | S2  |
| 3. General procedure .....                       | S8  |
| 4. X-Ray crystallographic structure.....         | S9  |
| 5. Reference.....                                | S10 |
| 6. Spectra data for substrates and products..... | S10 |
| 7. NMR spectra.....                              | S24 |
| 8. HPLC spectra.....                             | S55 |

### 1. General information and materials

**General information:** All commercial reagents were used without further purification unless otherwise noted.  $^1\text{H}$ ,  $^{13}\text{C}$ ,  $^{19}\text{F}$  NMR spectra were measured on NMR instrument (400 or 500 MHz for  $^1\text{H}$  NMR, 101 or 126 MHz for  $^{13}\text{C}$  NMR and 377 MHz for  $^{19}\text{F}$  NMR). Tetramethylsilane (TMS) served as the internal standard for  $^1\text{H}$  NMR, and  $\text{CDCl}_3$  served as the internal standard for  $^{13}\text{C}$  NMR. The following abbreviations were used to express the multiplicities: s = singlet; d = doublet; t = triplet; q = quartet; m = multiplet; br = broad. The enantiomeric excesses were determined by HPLC analysis on Chiral Daicel Chiralpak OD-H, OJ-H, AS-H, AD-H. Optical rotations were measured on a commercial polarimeter and reported as follows:  $[\alpha]_{\text{D}}^{25}$  (c = g/100 mL, solvent). HRMS was recorded on a commercial instrument (ESI and APCI Source).

**Materials:** The corresponding 2-mercaptobenzothiazole derivatives **2b**, **2d**, **2g**, **2h**, **2l**, **2m**, **2n**, **2p** were prepared according to the procedures reported previously.<sup>1,2</sup> Others were from commercial Alfa-Aesar, Acros, TCI etc.

### 2. Optimization of reaction conditions

**Table S1.** Screening of atmosphere<sup>a</sup>

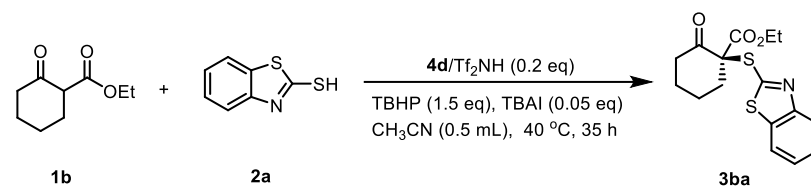

| Entry | Atmosphere | Yield (%) | Ee (%) |
|-------|------------|-----------|--------|
| 1     | Ar         | 83        | 86     |
| 2     | Air        | 71        | 87     |

<sup>a</sup>All reactions were performed at 40 °C in MeCN (0.5 mL) with **1b** (0.10 mmol), **2a** (0.10 mmol), TBAI (0.05 eq), TBHP (1.5 eq), **4d/Tf<sub>2</sub>NH** (20 mol%) and pimelic acid (0.3 eq) for 35 h. Yield was based on <sup>1</sup>H NMR analysis of the crude product using 1,3,5-trimethoxybenzene as an internal standard. Ee values base on HPLC analysis.

**Table S2.** Screening of temperature<sup>a</sup>

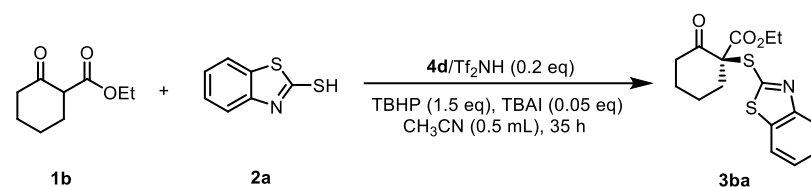

| Entry | Temperature (°C) | Yield (%) | Ee (%) |
|-------|------------------|-----------|--------|
| 1     | 50               | 81        | 85     |
| 2     | 40               | 89        | 86     |
| 3     | R.T.             | 86        | 86     |
| 4     | -5               | 10        | 24     |

<sup>a</sup>All reactions were performed in MeCN (0.5 mL) with **1b** (0.10 mmol), **2a** (0.10 mmol), TBAI (0.05 eq), TBHP (1.5 eq), **4d/Tf<sub>2</sub>NH** (20 mol%) and pimelic acid (0.3 eq) for 35 h at Ar atmosphere. Yield was based on <sup>1</sup>H NMR analysis of the crude product using 1,3,5-trimethoxybenzene as an internal standard. Ee values base on HPLC analysis.

**Table S3.** Screening of iodide anion<sup>a</sup>

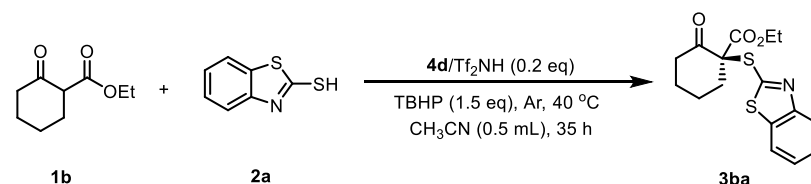

| Entry | Iodide anion | Yield (%) | Ee (%) |
|-------|--------------|-----------|--------|
| 1     | NaI          | 88        | 81     |
| 2     | KI           | 86        | 86     |
| 3     | TBAI         | 89        | 86     |
| 4     | TMAI         | 77        | 86     |
| 5     | TEAI         | 84        | 86     |
| 6     | NiI          | 94        | 5      |

<sup>a</sup>All reactions were performed at 40 °C in MeCN (0.5 mL) with **1b** (0.10 mmol), **2a** (0.10 mmol), iodide anion (0.05 eq), TBHP (1.5 eq), **4d**/Tf<sub>2</sub>NH (20 mol%) and pimelic acid (0.3 eq) for 35 h at Ar atmosphere. Yield was based on <sup>1</sup>H NMR analysis of the crude product using 1,3,5-trimethoxybenzene as an internal standard. Ee values base on HPLC analysis.

**Table S4.** Screening of the amount of TBAI<sup>a</sup>

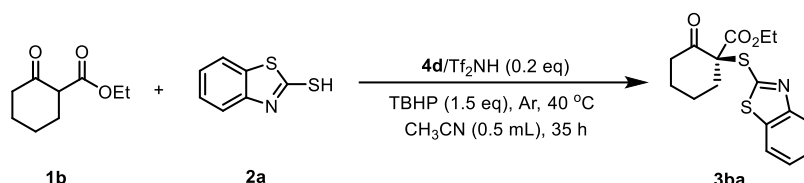

| Entry | TBAI (x eq) | Yield (%) | Ee (%) |
|-------|-------------|-----------|--------|
| 1     | 0.0125      | 62        | 76     |
| 2     | 0.025       | 89        | 84     |
| 3     | 0.05        | 89        | 86     |
| 4     | 0.1         | 52        | 88     |
| 5     | 0.2         | 69        | 88     |

<sup>a</sup>All reactions were performed at 40 °C in MeCN (0.5 mL) with **1b** (0.10 mmol), **2a** (0.10 mmol), TBAI (x eq), TBHP (1.5 eq), **4d**/Tf<sub>2</sub>NH (20 mol%) and pimelic acid (0.3 eq) for 35 h at Ar atmosphere. Yield was based on <sup>1</sup>H NMR analysis of the crude product using 1,3,5-trimethoxybenzene as an internal standard. Ee values base on HPLC analysis.

**Table S5.** Screening of the solvent<sup>a</sup>

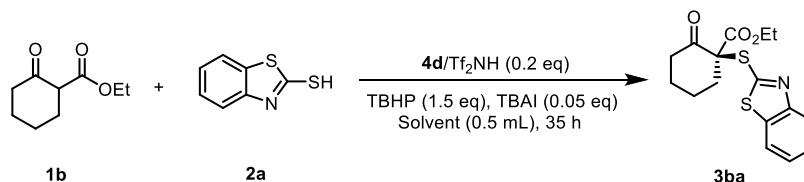



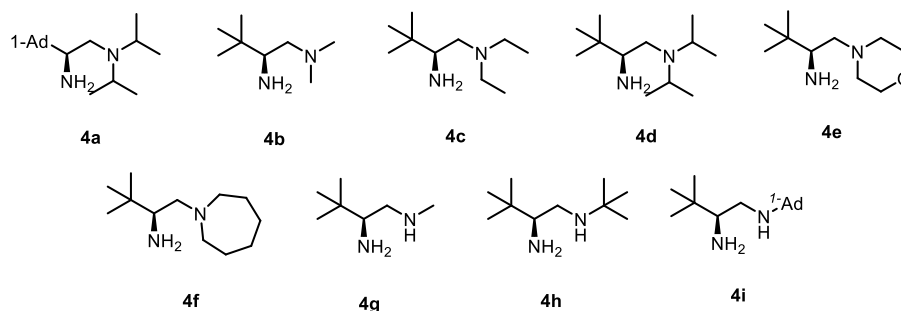

<sup>a</sup>All reactions were performed at 40 °C in DCM (0.5 mL) with **1b** (0.10 mmol), **2a** (0.10 mmol), TBAI (0.05 eq), TBHP (1.5 eq), amine catalyst (20 mol%) and pimelic acid (0.3 eq) for 35 h at Ar atmosphere. Yield was based on <sup>1</sup>H NMR analysis of the crude product using 1,3,5-trimethoxybenzene as an internal standard. Ee values base on HPLC analysis.

**Table S7.** Screening of the ratio between **1b** and **2a**<sup>a</sup>

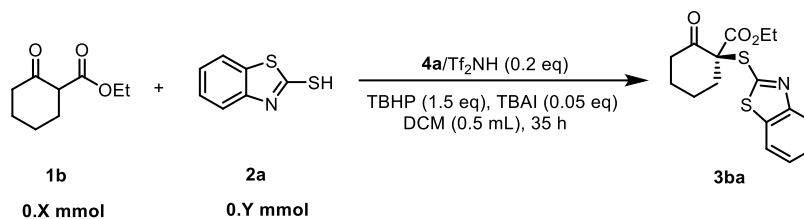

| Entry | X : Y     | Yield (%) | Ee (%) |
|-------|-----------|-----------|--------|
| 1     | 1.0 : 1.2 | 85        | 84     |
| 2     | 1.0 : 1.0 | 87        | 88     |
| 3     | 1.2 : 1.0 | 92        | 90     |
| 4     | 1.4 : 1.0 | 98        | 90     |
| 5     | 1.6 : 1.0 | 98        | 90     |
| 6     | 1.8 : 1.0 | 97        | 90     |

<sup>a</sup>All reactions were performed at 40 °C in DCM (0.5 mL) with **1b** (0.X mmol), **2a** (0.Y mmol), TBAI (0.05 eq), TBHP (1.5 eq), **4a**/Tf<sub>2</sub>NH (20 mol%) and pimelic acid (0.3 eq) for 35 h at Ar atmosphere. Yield was based on <sup>1</sup>H NMR analysis of the crude product using 1,3,5-trimethoxybenzene as an internal standard. Ee values base on HPLC analysis.

**Table S8.** Screening of the oxidant<sup>a</sup>

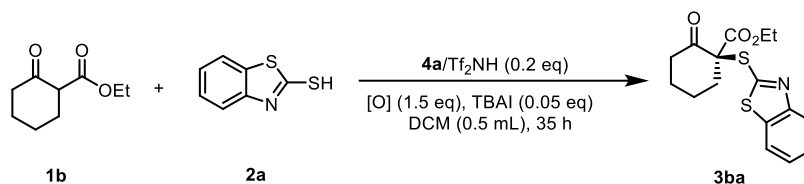

| Entry | Oxidant                | Yield (%) | Ee (%) |
|-------|------------------------|-----------|--------|
| 1     | TBHP                   | 95        | 90     |
| 2     | DTBP                   | Trace     | /      |
| 3     | $\text{H}_2\text{O}_2$ | N.R.      | /      |

<sup>a</sup>All reactions were performed at 40 °C in DCM (0.5 mL) with **1b** (0.14 mmol), **2a** (0.1 mmol), TBAI (0.05 eq), oxidant (1.5 eq), **4a**/ $\text{Tf}_2\text{NH}$  (20 mol%) and pimelic acid (0.3 eq) for 35 h at Ar atmosphere. Yield was based on  $^1\text{H}$  NMR analysis of the crude product using 1,3,5-trimethoxybenzene as an internal standard. Ee values base on HPLC analysis.

**Table S9.** Screening of the amount of acid<sup>a</sup>

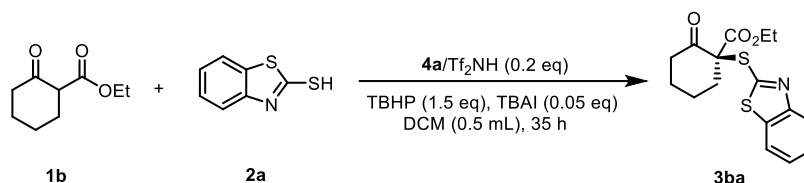

| Entry | Pimelic acid (X eq) | Yield (%) | Ee (%) |
|-------|---------------------|-----------|--------|
| 1     | 0.3                 | 95        | 90     |
| 2     | 0.2                 | 93        | 91     |
| 3     | 0.1                 | 94        | 91     |

<sup>a</sup>All reactions were performed at 40 °C in DCM (0.5 mL) with **1b** (0.14 mmol), **2a** (0.1 mmol), TBAI (0.05 eq), TBHP (1.5 eq), **4a**/ $\text{Tf}_2\text{NH}$  (20 mol%) and pimelic acid (X eq) for 35 h at Ar atmosphere. Yield was based on  $^1\text{H}$  NMR analysis of the crude product using 1,3,5-trimethoxybenzene as an internal standard. Ee values base on HPLC analysis.

**Table S10.** Screening of the acid<sup>a</sup>

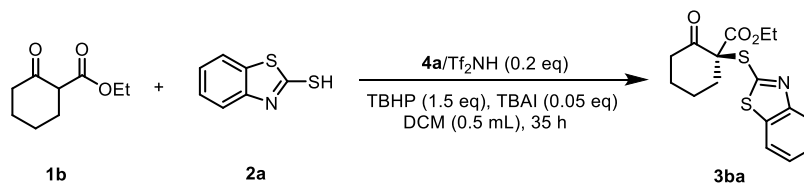

| Entry | Acid (0.1 eq)                                   | Yield (%) | Ee (%) |
|-------|-------------------------------------------------|-----------|--------|
| 1     | pimelic acid                                    | 93        | 91     |
| 2     | TsOH                                            | 56        | 31     |
| 3     | BnCO <sub>2</sub> H                             | 90        | 90     |
| 4     | C <sub>6</sub> F <sub>5</sub> CO <sub>2</sub> H | 95        | 53     |
| 5     | <i>m</i> -NO <sub>2</sub> PhCO <sub>2</sub> H   | 92        | 90     |
| 6     | Malonic acid                                    | 95        | 51     |

<sup>a</sup>All reactions were performed at 40 °C in DCM (0.5 mL) with **1b** (0.14 mmol), **2a** (0.1 mmol), TBAI (0.05 eq), TBHP (1.5 eq), **4a**/Tf<sub>2</sub>NH (20 mol%) and acid (0.1 eq) for 35 h at Ar atmosphere. Yield was based on <sup>1</sup>H NMR analysis of the crude product using 1,3,5-trimethoxybenzene as an internal standard. Ee values base on HPLC analysis.

**Table S11.** Control experiments<sup>a</sup>

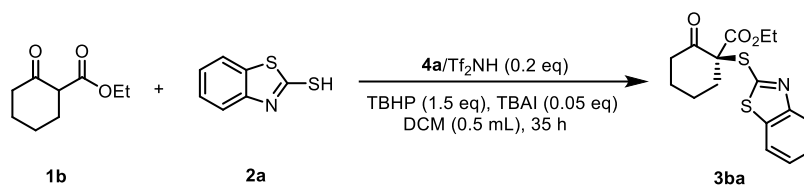

| Entry | Conditions     | Yield (%) | Ee (%) |
|-------|----------------|-----------|--------|
| 1     | No TBAI        | N.R.      | /      |
| 2     | No TBHP        | N.R.      | /      |
| 3     | No acid        | 87        | 89     |
| 4     | BHT (3.0 eq)   | 94        | 91     |
| 5     | TEMPO (3.0 eq) | 75        | 82     |

<sup>a</sup>All reactions were performed at 40 °C in DCM (0.5 mL) with **1b** (0.14 mmol), **2a** (0.1 mmol), TBAI (0.05 eq), TBHP (1.5 eq), **4a**/Tf<sub>2</sub>NH (20 mol%) and pimelic acid (0.1 eq) for 35 h at Ar atmosphere. Yield was based on <sup>1</sup>H NMR analysis of the crude product using 1,3,5-trimethoxybenzene as an internal standard. Ee values base on HPLC analysis.

### 3. General procedure of the catalytic reactions





|                                                |                                                               |
|------------------------------------------------|---------------------------------------------------------------|
| $\gamma/^\circ$                                | 90                                                            |
| Volume/ $\text{\AA}^3$                         | 1607.49(4)                                                    |
| Z                                              | 4                                                             |
| $\rho_{\text{calc}}/\text{g}/\text{cm}^3$      | 1.460                                                         |
| $\mu/\text{mm}^{-1}$                           | 3.228                                                         |
| F(000)                                         | 736.0                                                         |
| Crystal size/ $\text{mm}^3$                    | $0.11 \times 0.05 \times 0.05$                                |
| Radiation                                      | CuK $\alpha$ ( $\lambda = 1.54184$ )                          |
| 2 $\Theta$ range for data collection/ $^\circ$ | 6.61 to 150.696                                               |
| Index ranges                                   | $-8 \leq h \leq 7, -11 \leq k \leq 6, -33 \leq l \leq 33$     |
| Reflections collected                          | 9366                                                          |
| Independent reflections                        | 3191 [ $R_{\text{int}} = 0.0270, R_{\text{sigma}} = 0.0268$ ] |
| Data/restraints/parameters                     | 3191/0/209                                                    |
| Goodness-of-fit on $F^2$                       | 1.032                                                         |
| Final R indexes [ $I \geq 2\sigma(I)$ ]        | $R_1 = 0.0280, wR_2 = 0.0723$                                 |
| Final R indexes [all data]                     | $R_1 = 0.0294, wR_2 = 0.0731$                                 |
| Largest diff. peak/hole / $e \text{\AA}^{-3}$  | 0.17/-0.20                                                    |
| Flack parameter                                | -0.006(8)                                                     |

## 5. Reference

- (1) Wang, F.; Cai, S.; Wang, Z.; Xi, C. Synthesis of 2-Mercaptobenzothiazoles via DBU-Promoted Tandem Reaction of o-Haloanilines and Carbon Disulfide. *Org. Lett.* **2011**, *13*, 3202-33205.
- (2) Gao, M.; Lou, C. Q.; Zhu, N.; Qin, W.; Suo, Q.; Han, L.; Hong, H. Efficient, Iron-Catalyzed Synthesis of 2-Mercaptobenzothiazole through S-Arylation/Heterocyclization of 2-Haloaniline with Potassium Xanthate. *Synth. Commun.* **2015**, *45*, 2378.

## 6. Spectra data for substrates and products

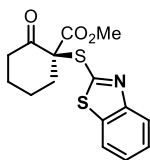

**3aa**: pale yellow oil, 72% yield, 89% ee.  $[\alpha]_D^{20} = -12.8$  ( $c = 2.3, \text{CHCl}_3$ ).  $^1\text{H NMR}$  (400 MHz,  $\text{CDCl}_3$ )  $\delta$  7.95 (d,  $J = 8.1$  Hz, 1H), 7.79 (d,  $J = 7.9$  Hz, 1H), 7.44 (t,  $J = 7.3$  Hz, 1H), 7.36 (t,  $J = 7.4$  Hz, 1H), 3.78 (s, 3H), 2.89 (dd,  $J = 8.7, 5.3$  Hz, 1H), 2.82 – 2.72 (m, 1H), 2.53 (ddd,  $J = 14.4, 11.0, 5.7$  Hz, 1H), 2.30 – 2.16 (m, 1H), 2.07 – 1.73 (m, 4H).  $^{13}\text{C NMR}$  (101 MHz,

CDCl<sub>3</sub>) δ 201.8, 168.6, 160.0, 153.2, 137.3, 126.2, 125.4, 122.9, 121.1, 69.5, 53.4, 40.5, 37.6, 26.9, 22.7. IR (thin film, cm<sup>-1</sup>) 3019, 2400, 1718, 1431, 1428, 1311, 1214, 1126, 1078, 991, 929, 744, 668, 627, 555, 432. HRMS (ESI) calcd for C<sub>15</sub>H<sub>16</sub>NO<sub>3</sub>S<sub>2</sub><sup>+</sup> (M+H<sup>+</sup>) 322.05661 found 322.05587. HPLC analysis: Daicel Chiralpak OJ-H, hexane/iso-propanol = 95:5, flow rate = 1.0 mL/min, λ = 222 nm, retention time: 42.6 min (minor) and 46.1 min (major).

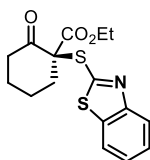

**3ba**: pale yellow oil, 90% yield, 91% ee.  $[\alpha]_D^{20} = -22.4$  (c = 3.3, CHCl<sub>3</sub>). <sup>1</sup>H NMR (400 MHz, CDCl<sub>3</sub>) δ 7.95 (d, *J* = 8.1 Hz, 1H), 7.79 (d, *J* = 7.9 Hz, 1H), 7.44 (t, *J* = 7.6 Hz, 1H), 7.36 (t, *J* = 7.5 Hz, 1H), 4.24 (q, *J* = 7.1 Hz, 2H), 2.91 (d, *J* = 13.8 Hz, 1H), 2.79 (dd, *J* = 10.1, 4.2 Hz, 1H), 2.63 – 2.48 (m, 1H), 2.31 – 2.16 (m, 1H), 2.05 – 1.75 (m, 4H), 1.20 (t, *J* = 7.1 Hz, 3H). <sup>13</sup>C NMR (101 MHz, CDCl<sub>3</sub>) δ 201.9, 168.0, 160.2, 153.2, 137.3, 126.2, 125.4, 122.9, 121.1, 69.5, 62.6, 40.5, 37.6, 26.8, 22.7, 13.9. IR (thin film, cm<sup>-1</sup>) 3019, 2400, 1717, 1521, 1428, 1214, 929, 744, 668, 628, 556, 495. HRMS (ESI) calcd for C<sub>16</sub>H<sub>18</sub>NO<sub>3</sub>S<sub>2</sub><sup>+</sup> (M+H<sup>+</sup>) 336.07226 found 336.07123. HPLC analysis: Daicel Chiralpak OJ-H, hexane/iso-propanol = 95:5, flow rate = 1.0 mL/min, λ = 222 nm, retention time: 24.9 min (minor) and 30.8 min (major).

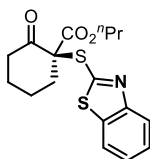

**3ca**: colorless oil, 68% yield, 89% ee.  $[\alpha]_D^{20} = -24.1$  (c = 2.2, CHCl<sub>3</sub>). <sup>1</sup>H NMR (400 MHz, CDCl<sub>3</sub>) δ 7.95 (d, *J* = 8.1 Hz, 1H), 7.80 (d, *J* = 8.0 Hz, 1H), 7.45 (t, *J* = 7.6 Hz, 1H), 7.37 (t, *J* = 7.6 Hz, 1H), 4.15 (t, *J* = 6.6 Hz, 2H), 3.01 – 2.86 (m, 1H), 2.80 (dt, *J* = 8.8, 4.1 Hz, 1H), 2.56 (ddd, *J* = 14.3, 11.1, 5.7 Hz, 1H), 2.34 – 2.18 (m, 1H), 2.08 – 1.77 (m, 4H), 1.61 (h, *J* = 7.1 Hz, 3H), 0.87 (t, *J* = 7.4 Hz, 3H). <sup>13</sup>C NMR (101 MHz, CDCl<sub>3</sub>) δ 201.87 (s), 168.10 (s), 160.25 (s), 153.20 (s), 137.22 (s), 126.18 (s), 125.35 (s), 122.8, 121.1, 69.6, 68.2, 40.5, 37.6, 26.8, 22.7, 21.7, 10.3. IR (thin film, cm<sup>-1</sup>) 3019, 2971, 2940, 2400, 1717, 1454, 1429, 1311, 1214, 1126, 1055, 991, 745, 668, 628, 557. HRMS (ESI) calcd for C<sub>17</sub>H<sub>20</sub>NO<sub>3</sub>S<sub>2</sub><sup>+</sup> (M+H<sup>+</sup>) 350.08791

found 350.08674. HPLC analysis: Daicel Chiralpak OJ-H, hexane/iso-propanol = 95:5, flow rate = 1.0 mL/min,  $\lambda = 222$  nm, retention time: 17.9 min (minor) and 22.9 min (major).

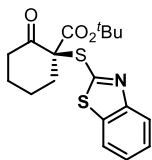

**3da**

**3da:** colorless oil, 77% yield, 91% ee.  $[\alpha]_D^{20} = -34.8$  ( $c = 2.8$ ,  $\text{CHCl}_3$ ).  $^1\text{H}$  NMR (400 MHz,  $\text{CDCl}_3$ )  $\delta$  7.93 (d,  $J = 8.1$  Hz, 1H), 7.78 (d,  $J = 7.9$  Hz, 1H), 7.43 (t,  $J = 7.6$  Hz, 1H), 7.35 (t,  $J = 7.5$  Hz, 1H), 2.86 (d,  $J = 14.4$  Hz, 1H), 2.75 (d,  $J = 14.3$  Hz, 1H), 2.61 – 2.51 (m, 1H), 2.28 – 2.16 (m, 1H), 2.03 (s, 1H), 1.95 – 1.74 (m, 3H), 1.41 (s, 9H).  $^{13}\text{C}$  NMR (101 MHz,  $\text{CDCl}_3$ )  $\delta$  202.0, 166.8, 160.7, 153.1, 137.3, 126.1, 125.3, 122.7, 121.1, 83.7, 70.1, 40.6, 37.7, 27.7, 26.7, 22.9. IR (thin film,  $\text{cm}^{-1}$ ) 3019, 2933, 2868, 2400, 1716, 1455, 1429, 1370, 1335, 1252, 1215, 1160, 1147, 989, 942, 840, 751, 668, 627, 558. HRMS (ESI) calcd for  $\text{C}_{18}\text{H}_{22}\text{NO}_3$   $\text{S}_2^+$  ( $\text{M}+\text{H}^+$ ) 364.10356 found 364.10245. HPLC analysis: Daicel Chiralpak IC-H, hexane/iso-propanol = 95:5, flow rate = 1.0 mL/min,  $\lambda = 222$  nm, retention time: 21.2 min (major) and 22.5 min (minor).

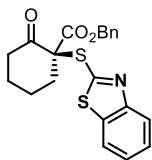

**3ea**

**3ea:** colorless oil, 45% yield, 86% ee.  $[\alpha]_D^{20} = -28.2$  ( $c = 1.7$ ,  $\text{CHCl}_3$ ).  $^1\text{H}$  NMR (400 MHz,  $\text{CDCl}_3$ )  $\delta$  7.91 (d,  $J = 8.1$  Hz, 1H), 7.75 (d,  $J = 7.9$  Hz, 1H), 7.43 (t,  $J = 7.6$  Hz, 1H), 7.35 (t,  $J = 7.6$  Hz, 1H), 7.24 (d,  $J = 1.4$  Hz, 5H), 5.20 (q,  $J = 12.2$  Hz, 2H), 2.92 (dt,  $J = 13.8$ , 5.4 Hz, 1H), 2.84 – 2.72 (m, 1H), 2.48 (ddd,  $J = 14.3$ , 10.9, 5.6 Hz, 1H), 2.26 (ddd,  $J = 14.2$ , 10.8, 3.6 Hz, 1H), 2.03 – 1.84 (m, 3H), 1.78 – 1.70 (m, 1H).  $^{13}\text{C}$  NMR (101 MHz,  $\text{CDCl}_3$ )  $\delta$  201.7, 167.9, 160.2, 153.2, 137.2, 128.7, 128.1, 126.2, 125.3, 122.9, 121.1, 69.6, 68.2, 40.4, 37.6, 26.9, 22.6. IR (thin film,  $\text{cm}^{-1}$ ) 3019, 1718, 1428, 1214, 1078, 991, 748, 668, 627. HRMS (ESI) calcd for  $\text{C}_{21}\text{H}_{20}\text{NO}_3\text{S}_2^+$  ( $\text{M}+\text{H}^+$ ) 398.08791 found 398.08664. HPLC analysis: Daicel Chiralpak OD-H, hexane/iso-propanol = 95:5, flow rate = 1.0 mL/min,  $\lambda = 205$  nm, retention time: 15.6 min (minor) and 17.9 min (major).

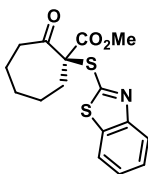

**3fa** colorless oil, 70% yield, 57% ee.  $[\alpha]_D^{20} = 5.4$  ( $c = 2.3$ ,  $\text{CHCl}_3$ ).  $^1\text{H NMR}$  (400 MHz,  $\text{CDCl}_3$ )  $\delta$  7.92 (d,  $J = 7.3$  Hz, 1H), 7.78 (d,  $J = 7.1$  Hz, 1H), 7.39 (dd,  $J = 27.2, 6.7$  Hz, 2H), 3.77 (s, 3H), 2.75 (dd,  $J = 20.2, 7.9$  Hz, 2H), 2.66 – 2.41 (m, 2H), 1.84 (s, 2H), 1.76 – 1.53 (m, 4H).  $^{13}\text{C NMR}$  (101 MHz,  $\text{CDCl}_3$ )  $\delta$  203.9, 168.9, 161.4, 153.3, 136.8, 126.2, 125.2, 122.7, 121.1, 73.9, 53.5, 40.7, 33.6, 29.8, 26.4, 24.5. IR (thin film,  $\text{cm}^{-1}$ ) 3020, 2932, 2857, 1739, 174, 1455, 1312, 1215, 1127, 1005, 940, 750, 668, 627. HRMS (ESI) calcd for  $\text{C}_{16}\text{H}_{18}\text{NO}_3\text{S}_2^+$  ( $\text{M}+\text{H}^+$ ) 336.07226 found 336.07108. HPLC analysis: Daicel Chiralpak OJ-H, hexane/iso-propanol = 95:5, flow rate = 1.0 mL/min,  $\lambda = 222$  nm, retention time: 25.7 min (minor) and 32.9 min (major).

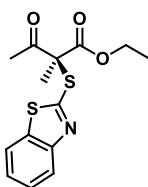

**3ga** colorless oil, 51% yield, 76% ee.  $[\alpha]_D^{20} = -33.6$  ( $c = 2.2$ ,  $\text{CHCl}_3$ ).  $^1\text{H NMR}$  (400 MHz,  $\text{CDCl}_3$ )  $\delta$  7.91 (d,  $J = 8.1$  Hz, 1H), 7.78 (d,  $J = 8.0$  Hz, 1H), 7.43 (t,  $J = 7.6$  Hz, 1H), 7.35 (t,  $J = 7.6$  Hz, 1H), 4.27 (q,  $J = 7.1$  Hz, 2H), 2.45 (s, 3H), 1.94 (s, 3H), 1.26 (t,  $J = 7.1$  Hz, 3H).  $^{13}\text{C NMR}$  (101 MHz,  $\text{CDCl}_3$ )  $\delta$  199.6, 168.7, 160.5, 153.3, 136.4, 126.3, 125.3, 122.6, 121.1, 68.2, 63.0, 26.0, 21.8, 13.9. IR (thin film,  $\text{cm}^{-1}$ ) 3020, 1716, 1429, 1232, 1215, 1122, 991, 906, 753, 728, 668, 650. HRMS (ESI) calcd for  $\text{C}_{14}\text{H}_{16}\text{NO}_3\text{S}_2^+$  ( $\text{M}+\text{H}^+$ ) 310.05661 found 310.05843. HPLC analysis: Daicel Chiralpak OJ-H, hexane/iso-propanol = 95:5, flow rate = 1.0 mL/min,  $\lambda = 222$  nm, retention time: 19.3 min (minor) and 22.3 min (major).

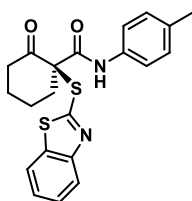

3ha

**3ha:** white solid, 83% yield, 83% ee.  $[\alpha]_D^{20} = 44.6$  ( $c = 3.3$ ,  $\text{CHCl}_3$ ).  $^1\text{H}$  NMR (400 MHz,  $\text{CDCl}_3$ )  $\delta$  10.44 (s, 1H), 7.96 (d,  $J = 8.1$  Hz, 1H), 7.79 (d,  $J = 7.9$  Hz, 1H), 7.55 – 7.44 (m, 3H), 7.39 (t,  $J = 7.6$  Hz, 1H), 7.13 (d,  $J = 8.2$  Hz, 2H), 3.05 (dd,  $J = 14.2, 6.3$  Hz, 1H), 2.92 – 2.80 (m, 1H), 2.71 (dt,  $J = 9.2, 7.1$  Hz, 1H), 2.31 (s, 3H), 2.25 (dd,  $J = 10.3, 6.2$  Hz, 1H), 2.05 – 1.85 (m, 4H).  $^{13}\text{C}$  NMR (101 MHz,  $\text{CDCl}_3$ )  $\delta$  204.4, 166.6, 163.1, 152.5, 135.7, 134.0, 129.5, 126.7, 125.5, 121.9, 121.3, 119.9, 69.2, 40.2, 36.6, 26.9, 22.1, 20.9. IR (thin film,  $\text{cm}^{-1}$ ) 2927, 2253, 1715, 1673, 1612, 1552, 1414, 1513, 1276, 1260, 995, 903, 724, 649, 554, 509. HRMS (ESI) calcd for  $\text{C}_{21}\text{H}_{21}\text{N}_2\text{O}_2\text{S}_2^+$  ( $\text{M}+\text{H}^+$ ) 397.10390 found 397.10595. HPLC analysis: Daicel Chiralpak OD-H, hexane/iso-propanol = 95:5, flow rate = 1.0 mL/min,  $\lambda = 247$  nm, retention time: 16.3 min (minor) and 20.9 min (major).

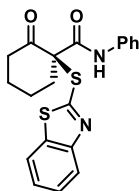

3ia

**3ia:** white solid, 84% yield, 77% ee.  $[\alpha]_D^{20} = 63.8$  ( $c = 3.2$ ,  $\text{CHCl}_3$ ).  $^1\text{H}$  NMR (400 MHz,  $\text{CDCl}_3$ )  $\delta$  10.60 (s, 1H), 7.97 (d,  $J = 8.1$  Hz, 1H), 7.87-7.77 (m, 1H), 7.60 (dd,  $J = 8.5, 0.9$  Hz, 2H), 7.54-7.47 (m, 1H), 7.42-7.36 (m, 1H), 7.34-7.28 (m, 2H), 7.14-7.04 (m, 1H), 3.14-2.96 (m, 1H), 3.12-2.94 (m, 1H), 2.86 (dd,  $J = 12.7, 6.9$  Hz, 1H), 2.86 (dd,  $J = 12.7, 6.9$  Hz, 1H), 2.70 (ddd,  $J = 14.4, 7.8, 3.9$  Hz, 1H), 2.70 (ddd,  $J = 14.4, 7.8, 3.9$  Hz, 1H), 2.26 (dd,  $J = 9.2, 4.3$  Hz, 1H), 2.26 (dd,  $J = 9.2, 4.3$  Hz, 1H), 2.11-1.90 (m, 4H), 1.99 (dddd,  $J = 20.8, 13.5, 9.8, 3.5$  Hz, 4H).  $^{13}\text{C}$  NMR (101 MHz,  $\text{CDCl}_3$ )  $\delta$  204.4, 166.9, 163.2, 152.4, 138.3, 135.8, 129.0, 126.7, 125.5, 124.4, 121.8, 121.3, 119.8, 69.1, 40.1, 36.5, 26.9, 22.1. IR (thin film,  $\text{cm}^{-1}$ ) 2947, 2253, 1716, 1676, 1600, 1499, 1455, 1313, 1262, 1125, 1080, 903, 724, 649, 582. HRMS (ESI) calcd for  $\text{C}_{20}\text{H}_{19}\text{N}_2\text{O}_2\text{S}_2^+$  ( $\text{M}+\text{H}^+$ ) 383.08825 found 383.08491. HPLC analysis: Daicel Chiralpak AD-H,

hexane/iso-propanol = 95:5, flow rate = 1.0 mL/min,  $\lambda$  = 206 nm, retention time: 22.1 min (minor) and 24.0 min (major).

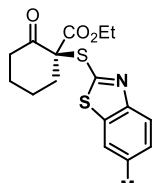

**3bb**: pale yellow oil, 81% yield, 90% ee.  $[\alpha]_D^{20}$  = -13.9 (c = 2.8, CHCl<sub>3</sub>). <sup>1</sup>H NMR (400 MHz, CDCl<sub>3</sub>)  $\delta$  7.84 (d,  $J$  = 8.3 Hz, 1H), 7.58 (s, 1H), 7.25 (d,  $J$  = 8.6 Hz, 1H), 4.23 (q,  $J$  = 7.1 Hz, 2H), 2.88 (d,  $J$  = 14.1 Hz, 1H), 2.78 (dd,  $J$  = 9.8, 4.4 Hz, 1H), 2.62 – 2.50 (m, 1H), 2.46 (s, 3H), 2.27 – 2.15 (m, 1H), 2.07 – 1.70 (m, 4H), 1.20 (t,  $J$  = 7.1 Hz, 3H). <sup>13</sup>C NMR (101 MHz, CDCl<sub>3</sub>)  $\delta$  202.0, 168.0, 158.5, 151.4, 137.7, 135.7, 127.8, 122.5, 120.8, 69.5, 62.6, 40.5, 37.6, 26.9, 22.8, 21.6, 13.9. IR (thin film, cm<sup>-1</sup>) 3019, 1717, 1214, 744, 668, 628. HRMS (ESI) calcd for C<sub>17</sub>H<sub>20</sub>NO<sub>3</sub>S<sub>2</sub><sup>+</sup> (M+H<sup>+</sup>) 350.08791 found 350.08676. HPLC analysis: Daicel Chiralpak OJ-H, hexane/iso-propanol = 95:5, flow rate = 1.0 mL/min,  $\lambda$  = 222 nm, retention time: 25.2 min (major) and 30.0 min (minor).

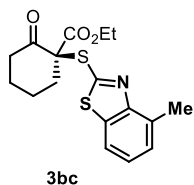

**3bc**: colorless oil, 67% yield, 89% ee.  $[\alpha]_D^{20}$  = -10.2 (c = 2.3, CHCl<sub>3</sub>). <sup>1</sup>H NMR (400 MHz, CDCl<sub>3</sub>)  $\delta$  7.65 – 7.47 (m, 1H), 7.23 (d,  $J$  = 6.8 Hz, 2H), 4.24 (q,  $J$  = 7.1 Hz, 2H), 2.89 (d,  $J$  = 14.0 Hz, 1H), 2.82 (dd,  $J$  = 9.7, 4.7 Hz, 1H), 2.68 (s, 3H), 2.56 (ddd,  $J$  = 14.5, 10.8, 5.6 Hz, 1H), 2.35 – 2.22 (m, 1H), 2.06 – 1.77 (m, 4H), 1.20 (t,  $J$  = 7.1 Hz, 3H). <sup>13</sup>C NMR (101 MHz, CDCl<sub>3</sub>)  $\delta$  202.0, 168.1, 158.9, 152.6, 136.9, 132.8, 126.7, 125.3, 118.5, 69.6, 62.5, 40.5, 37.5, 27.0, 22.7, 18.4, 13.9. IR (thin film, cm<sup>-1</sup>) 3019, 1717, 1445, 1214, 1019, 986, 747, 688, 627, 557. HRMS (ESI) calcd for C<sub>17</sub>H<sub>20</sub>NO<sub>3</sub>S<sub>2</sub><sup>+</sup> (M+H<sup>+</sup>) 350.08791 found 350.08632. HPLC analysis: Daicel Chiralpak OJ-H, hexane/iso-propanol = 95:5, flow rate = 1.0 mL/min,  $\lambda$  = 224 nm, retention time: 11.6 min (minor) and 13.6 min (major).

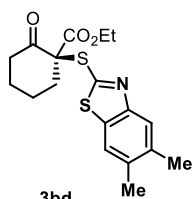

**3bd**: colorless oil, 82% yield, 88% ee.  $[\alpha]_D^{20} = -15.3$  ( $c = 3.0$ ,  $\text{CHCl}_3$ ).  $^1\text{H NMR}$  (400 MHz,  $\text{CDCl}_3$ )  $\delta$  7.74 (s, 1H), 7.54 (s, 1H), 7.26 (s, 1H), 4.22 (q,  $J = 7.1$  Hz, 2H), 2.94 – 2.82 (m, 1H), 2.82 – 2.72 (m, 1H), 2.51 (ddd,  $J = 14.3, 11.2, 5.7$  Hz, 1H), 2.36 (d,  $J = 3.4$  Hz, 6H), 2.24 – 2.15 (m, 1H), 2.02 – 1.69 (m, 4H), 1.20 (t,  $J = 7.1$  Hz, 3H).  $^{13}\text{C NMR}$  (101 MHz,  $\text{CDCl}_3$ )  $\delta$  202.1, 168.0, 158.1, 152.1, 135.6, 135.1, 123.1, 121.0, 69.4, 62.6, 40.5, 37.6, 26.9, 22.8, 20.2, 13.9. IR (thin film,  $\text{cm}^{-1}$ ) 3014, 2939, 2867, 1717, 1540, 1442, 1366, 1334, 1297, 1238, 1216, 1140, 1092, 1043, 1021, 980, 902, 867, 812, 753, 686, 667, 557, 519, 436. HRMS (ESI) calcd for  $\text{C}_{18}\text{H}_{22}\text{NO}_3\text{S}_2^+$  ( $\text{M}+\text{H}^+$ ) 364.10356 found 364.10239. HPLC analysis: Daicel Chiralpak OD-H, hexane/iso-propanol = 95:5, flow rate = 1.0 mL/min,  $\lambda = 224$  nm, retention time: 10.3 min (major) and 11.6 min (minor).

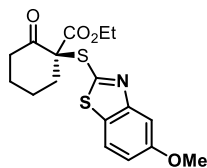

**3be**: colorless oil, 89% yield, 90% ee.  $[\alpha]_D^{20} = -27.9$  ( $c = 3.2$ ,  $\text{CHCl}_3$ ).  $^1\text{H NMR}$  (400 MHz,  $\text{CDCl}_3$ )  $\delta$  7.61 (d,  $J = 8.8$  Hz, 1H), 7.42 (s, 1H), 6.99 (d,  $J = 8.7$  Hz, 1H), 4.21 (q,  $J = 7.1$  Hz, 2H), 3.84 (s, 3H), 2.89 (d,  $J = 14.2$  Hz, 1H), 2.81 – 2.69 (m, 1H), 2.61 – 2.46 (m, 1H), 2.27 – 2.13 (m, 1H), 2.07 – 1.67 (m, 4H), 1.18 (t,  $J = 7.1$  Hz, 3H).  $^{13}\text{C NMR}$  (101 MHz,  $\text{CDCl}_3$ )  $\delta$  202.0, 168.0, 160.7, 159.0, 154.5, 129.2, 121.3, 115.9, 105.1, 69.5, 62.6, 55.6, 40.5, 37.6, 26.9, 22.7, 13.9. IR (thin film,  $\text{cm}^{-1}$ ) 3019, 2942, 2918, 1716, 1601, 1470, 1430, 1407, 1328, 1276, 1214, 1161, 1078, 1030, 842, 747, 668, 641, 556. HRMS (ESI) calcd for  $\text{C}_{17}\text{H}_{20}\text{NO}_4\text{S}_2^+$  ( $\text{M}+\text{H}^+$ ) 366.08283 found 366.08173. HPLC analysis: Daicel Chiralpak AD-H, hexane/iso-propanol = 99:1, flow rate = 0.5 mL/min,  $\lambda = 226$  nm, retention time: 106.7 min (major) and 110.6 min (minor).



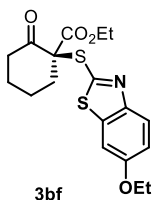

**3bf**: brown oil, 86% yield, 91% ee.  $[\alpha]_{\text{D}}^{20} = -13.9$  ( $c = 3.2$ ,  $\text{CHCl}_3$ ).  $^1\text{H NMR}$  (400 MHz,  $\text{CDCl}_3$ )  $\delta$  7.85 (d,  $J = 8.7$  Hz, 1H), 7.22 (s, 1H), 7.04 (d,  $J = 8.1$  Hz, 1H), 4.23 (d,  $J = 6.7$  Hz, 2H), 4.07 (d,  $J = 6.5$  Hz, 2H), 2.82 (dd,  $J = 34.1, 13.4$  Hz, 2H), 2.51 (d,  $J = 9.8$  Hz, 1H), 2.16 (t,  $J = 10.7$  Hz, 1H), 2.05 – 1.66 (m, 4H), 1.44 (t,  $J = 6.0$  Hz, 3H), 1.20 (t,  $J = 6.4$  Hz, 3H).  $^{13}\text{C NMR}$  (101 MHz,  $\text{CDCl}_3$ )  $\delta$  202.1, 168.0, 157.4, 155.9, 147.9, 139.3, 123.7, 116.3, 104.0, 69.4, 64.1, 62.6, 40.5, 37.6, 26.9, 22.8, 14.8, 13.9. IR (thin film,  $\text{cm}^{-1}$ ) 3019, 1717, 1601, 1467, 1214, 1066, 1038, 938, 749, 668, 558. HRMS (ESI) calcd for  $\text{C}_{18}\text{H}_{22}\text{NO}_4\text{S}_2^+$  ( $\text{M}+\text{H}^+$ ) 380.09848 found 380.09774. HPLC analysis: Daicel Chiralpak OD-H, hexane/iso-propanol = 95:5, flow rate = 1.0 mL/min,  $\lambda = 219$  nm, retention time: 12.3 min (minor) and 13.0 min (major).

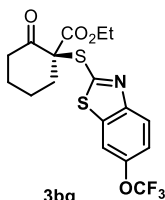

**3bg**: yellow oil, 79% yield, 90% ee.  $[\alpha]_{\text{D}}^{20} = -15.6$  ( $c = 3.0$ ,  $\text{CHCl}_3$ ).  $^1\text{H NMR}$  (400 MHz,  $\text{CDCl}_3$ )  $\delta$  7.93 (d,  $J = 8.9$  Hz, 1H), 7.66 (s, 1H), 7.32 (d,  $J = 8.8$  Hz, 1H), 4.25 (q,  $J = 7.1$  Hz, 2H), 2.92 (d,  $J = 13.9$  Hz, 1H), 2.79 (dd,  $J = 10.0, 4.3$  Hz, 1H), 2.57 (ddd,  $J = 14.6, 11.2, 5.8$  Hz, 1H), 2.33 – 2.18 (m, 1H), 2.05 (d,  $J = 5.4$  Hz, 1H), 1.99 – 1.72 (m, 3H), 1.22 (t,  $J = 7.1$  Hz, 3H).  $^{13}\text{C NMR}$  (101 MHz,  $\text{CDCl}_3$ )  $\delta$  201.7, 167.9, 161.9, 151.6, 146.6, 137.9, 123.6, 120.5 (q,  $J = 257.8$  Hz), 120.1, 113.6, 69.7, 62.7, 40.5, 37.6, 26.8, 22.7, 13.9.  $^{19}\text{F NMR}$  (376 MHz,  $\text{CDCl}_3$ )  $\delta$  -58.04 (s). IR (thin film,  $\text{cm}^{-1}$ ) 3019, 1717, 1521, 1428, 1214, 744, 668, 626. HRMS (ESI) calcd for  $\text{C}_{17}\text{H}_{17}\text{F}_3\text{NO}_4\text{S}_2^+$  ( $\text{M}+\text{H}^+$ ) 420.05456 found 420.05286. HPLC analysis: Daicel Chiralpak OJ-H, hexane/iso-propanol = 95:5, flow rate = 1.0 mL/min,  $\lambda = 225$  nm, retention time: 10.8 min (major) and 11.9 min (minor).

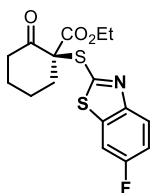

**3bh**: white solid, 59% yield, 85% ee.  $[\alpha]_D^{20} = -17.5$  ( $c = 2.1$ ,  $\text{CHCl}_3$ ).  $^1\text{H NMR}$  (400 MHz,  $\text{CDCl}_3$ )  $\delta$  7.87 (dd,  $J = 8.9, 4.8$  Hz, 1H), 7.45 (dd,  $J = 8.0, 2.4$  Hz, 1H), 7.15 (td,  $J = 8.9, 2.4$  Hz, 1H), 4.21 (q,  $J = 7.1$  Hz, 2H), 2.87 (d,  $J = 14.1$  Hz, 1H), 2.75 (dt,  $J = 13.6, 4.2$  Hz, 1H), 2.51 (ddd,  $J = 14.3, 11.2, 5.7$  Hz, 1H), 2.24 – 2.12 (m, 1H), 2.07 – 1.96 (m, 1H), 1.96 – 1.67 (m, 3H), 1.18 (t,  $J = 7.1$  Hz, 3H).  $^{13}\text{C NMR}$  (101 MHz,  $\text{CDCl}_3$ )  $\delta$  201.8, 167.9, 160.6 (d,  $J = 246.9$  Hz), 159.5 (d,  $J = 3.3$  Hz), 149.9 (d,  $J = 1.4$  Hz), 138.4 (d,  $J = 11.1$  Hz), 123.9 (d,  $J = 9.4$  Hz), 114.9 (d,  $J = 24.8$  Hz), 107.3 (d,  $J = 26.8$  Hz), 69.6, 62.7, 40.5, 37.6, 26.8, 22.7, 13.9.  $^{19}\text{F NMR}$  (376 MHz,  $\text{CDCl}_3$ )  $\delta$  -115.09 (s). IR (thin film,  $\text{cm}^{-1}$ ) 3019, 2942, 2869, 1717, 1601, 1563, 1467, 1449, 1367, 1335, 1312, 1240, 1214, 1141, 1091, 1002, 908, 851, 816, 751, 668, 606, 558. HRMS (ESI) calcd for  $\text{C}_{16}\text{H}_{17}\text{FNO}_3\text{S}_2^+$  ( $\text{M}+\text{H}^+$ ) 354.06284 found 354.06183. HPLC analysis: Daicel Chiralpak OD-H, hexane/iso-propanol = 95:5, flow rate = 1.0 mL/min,  $\lambda = 224$  nm, retention time: 9.6 min (minor) and 10.4 min (major).

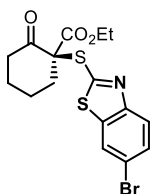

**3bi**: colorless oil, 70% yield, 82% ee.  $[\alpha]_D^{20} = -13.1$  ( $c = 2.8$ ,  $\text{CHCl}_3$ ).  $^1\text{H NMR}$  (400 MHz,  $\text{CDCl}_3$ )  $\delta$  7.93 (d,  $J = 1.6$  Hz, 1H), 7.79 (d,  $J = 8.7$  Hz, 1H), 7.55 (dd,  $J = 8.7, 1.7$  Hz, 1H), 4.25 (q,  $J = 7.1$  Hz, 2H), 2.92 (dd,  $J = 8.8, 5.2$  Hz, 1H), 2.87 – 2.75 (m, 1H), 2.57 (ddd,  $J = 14.4, 11.1, 5.8$  Hz, 1H), 2.32 – 2.19 (m, 1H), 2.05 (dd,  $J = 10.4, 4.8$  Hz, 1H), 2.02 – 1.78 (m, 3H), 1.22 (t,  $J = 7.1$  Hz, 3H).  $^{13}\text{C NMR}$  (101 MHz,  $\text{CDCl}_3$ )  $\delta$  201.8, 167.9, 161.2, 152.0, 138.7, 129.7, 123.8, 123.6, 119.1, 69.7, 62.7, 40.5, 37.6, 26.8, 22.7, 13.9. IR (thin film,  $\text{cm}^{-1}$ ) 3019, 2938, 2850, 1717, 1584, 1449, 1432, 1388, 1236, 1214, 1094, 1019, 1000, 861, 749, 668, 558. HRMS (ESI) calcd for  $\text{C}_{16}\text{H}_{17}\text{BrNO}_3\text{S}_2^+$  ( $\text{M}+\text{H}^+$ ) 413.98277 found 413.98203. HPLC analysis: Daicel Chiralpak IC-H, hexane/iso-propanol = 95:5, flow rate = 1.0 mL/min,  $\lambda = 224$  nm, retention time: 32.9 min (minor) and 37.2 min (major).

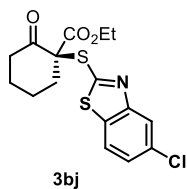

**3bj**: orange oil, 18% yield, 87% ee.  $[\alpha]_D^{20} = -14.3$  ( $c = 0.8$ ,  $\text{CHCl}_3$ ).  $^1\text{H NMR}$  (400 MHz,  $\text{CDCl}_3$ )  $\delta$  7.89 (s, 1H), 7.68 (d,  $J = 8.5$  Hz, 1H), 7.37 – 7.28 (m, 1H), 4.23 (q,  $J = 7.1$  Hz, 2H), 2.90 (d,  $J = 14.1$  Hz, 1H), 2.77 (dd,  $J = 10.4, 4.0$  Hz, 1H), 2.56 (ddd,  $J = 14.5, 11.2, 5.8$  Hz, 1H), 2.33 – 2.19 (m, 1H), 2.02 (d,  $J = 4.6$  Hz, 1H), 1.97 – 1.75 (m, 3H), 1.20 (t,  $J = 7.1$  Hz, 3H).  $^{13}\text{C NMR}$  (101 MHz,  $\text{CDCl}_3$ )  $\delta$  201.7, 167.9, 162.9, 153.9, 135.2, 132.3, 125.7, 122.4, 121.8, 69.8, 62.7, 40.5, 37.6, 26.8, 22.7, 13.9. IR (thin film,  $\text{cm}^{-1}$ ) 3020, 1718, 1431, 1214, 747, 668, 627. HRMS (ESI) calcd for  $\text{C}_{16}\text{H}_{17}\text{ClNO}_3\text{S}_2^+$  ( $\text{M}+\text{H}^+$ ) 370.03329 found 370.03232. HPLC analysis: Daicel Chiralpak OJ-H, hexane/iso-propanol = 95:5, flow rate = 1.0 mL/min,  $\lambda = 230$  nm, retention time: 17.7 min (minor) and 51.6 min (major).

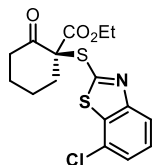

**3bk**: orange oil, 79% yield, 89% ee.  $[\alpha]_D^{20} = -14.3$  ( $c = 2.9$ ,  $\text{CHCl}_3$ ).  $^1\text{H NMR}$  (400 MHz,  $\text{CDCl}_3$ )  $\delta$  7.81 (d,  $J = 7.2$  Hz, 1H), 7.51 – 7.27 (m, 2H), 4.24 (d,  $J = 6.7$  Hz, 2H), 2.92 (d,  $J = 13.0$  Hz, 1H), 2.78 (d,  $J = 13.8$  Hz, 1H), 2.56 (s, 1H), 2.24 (t,  $J = 10.9$  Hz, 1H), 2.07 – 1.68 (m, 4H), 1.21 (t,  $J = 6.5$  Hz, 3H).  $^{13}\text{C NMR}$  (101 MHz,  $\text{CDCl}_3$ )  $\delta$  201.7, 167.9, 161.7, 153.7, 137.2, 127.1, 126.3, 125.0, 121.0, 69.7, 62.8, 40.5, 37.6, 26.8, 22.7, 13.9. IR (thin film,  $\text{cm}^{-1}$ ) 3019, 1717, 1455, 1395, 1309, 1237, 1091, 1017, 989, 929, 748, 668, 627, 557. HRMS (ESI) calcd for  $\text{C}_{16}\text{H}_{17}\text{ClNO}_3\text{S}_2^+$  ( $\text{M}+\text{H}^+$ ) 370.03329 found 370.03220. HPLC analysis: Daicel Chiralpak AD-H, hexane/iso-propanol = 95:5, flow rate = 1.0 mL/min,  $\lambda = 223$  nm, retention time: 8.4 min (minor) and 9.3 min (major).

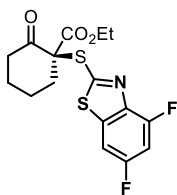

**3bl**: colorless oil, 68% yield, 91% ee.  $[\alpha]_D^{20} = -9.2$  ( $c = 2.5$ ,  $\text{CHCl}_3$ ).  $^1\text{H NMR}$  (400 MHz,  $\text{CDCl}_3$ )  $\delta$  7.50 – 7.35 (m, 2H), 4.28 (q,  $J = 7.1$  Hz, 2H), 2.98 – 2.76 (m, 2H), 2.65 – 2.51 (m, 1H), 2.43 – 2.26 (m, 1H), 2.14 – 1.91 (m, 3H), 1.90 – 1.71 (m, 1H), 1.25 (t,  $J = 7.0$  Hz, 3H).  $^{13}\text{C NMR}$  (101 MHz,  $\text{CDCl}_3$ )  $\delta$  201.5, 167.9, 161.7 (d,  $J = 3.1$  Hz), 159.7 (d,  $J = 250.2$  Hz), 148.3 (d,  $J = 2.0$  Hz), 137.8 (d,  $J = 11.4$  Hz), 118.5 (d,  $J = 27.3$  Hz), 116.1 (d,  $J = 11.0$  Hz), 106.6 (d,  $J = 26.4$  Hz), 70.0, 62.9, 40.5, 37.4, 26.4, 22.7, 14.0.  $^{19}\text{F NMR}$  (376 MHz,  $\text{CDCl}_3$ )  $\delta$  -114.10 (s). IR (thin film,  $\text{cm}^{-1}$ ) 3019, 2400, 1717, 1599, 1553, 1440, 1385, 1214, 1009, 930, 856, 744, 668, 627, 557, 497. HRMS (ESI) calcd for  $\text{C}_{16}\text{H}_{16}\text{F}_2\text{NO}_3\text{S}_2^+$  ( $\text{M}+\text{H}^+$ ) 372.05342 found 372.05641. HPLC analysis: Daicel Chiralpak OD-H, hexane/iso-propanol = 95:5, flow rate = 1.0 mL/min,  $\lambda = 283$  nm, retention time: 10.3 min (major) and 11.0 min (minor).

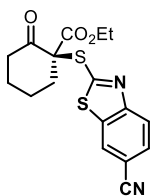

**3bm**: yellow oil, 60% yield, 90% ee.  $[\alpha]_D^{20} = -11.2$  ( $c = 2.1$ ,  $\text{CHCl}_3$ ).  $^1\text{H NMR}$  (400 MHz,  $\text{CDCl}_3$ )  $\delta$  8.10 (s, 1H), 7.93 (d,  $J = 8.4$  Hz, 1H), 7.66 (d,  $J = 8.3$  Hz, 1H), 4.25 (dd,  $J = 13.9, 6.9$  Hz, 2H), 2.95 (d,  $J = 13.7$  Hz, 1H), 2.79 (d,  $J = 14.5$  Hz, 1H), 2.67 – 2.54 (m, 1H), 2.29 (t,  $J = 10.7$  Hz, 1H), 2.05 (s, 1H), 2.00 – 1.81 (m, 3H), 1.21 (t,  $J = 7.0$  Hz, 3H).  $^{13}\text{C NMR}$  (101 MHz,  $\text{CDCl}_3$ )  $\delta$  201.4, 167.8, 167.0, 155.2, 136.9, 129.4, 125.7, 123.0, 118.6, 108.5, 70.1, 62.9, 40.5, 37.6, 26.7, 22.7, 13.9. IR (thin film,  $\text{cm}^{-1}$ ) 3020, 2229, 1717, 1437, 1214, 1042, 1008, 745, 668, 558. HRMS (ESI) calcd for  $\text{C}_{17}\text{H}_{17}\text{N}_2\text{O}_3\text{S}_2^+$  ( $\text{M}+\text{H}^+$ ) 361.06751 found 361.06656. HPLC analysis: Daicel Chiralpak OD-H, hexane/iso-propanol = 95:5, flow rate = 1.0 mL/min,  $\lambda = 220$  nm, retention time: 31.3 min (minor) and 33.3 min (major).

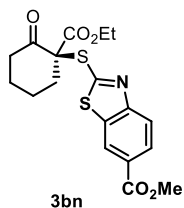

**3bn**: white solid, 79% yield, 90% ee.  $[\alpha]_D^{20} = -8.7$  ( $c = 3.2$ ,  $\text{CHCl}_3$ ).  $^1\text{H}$  NMR (400 MHz,  $\text{CDCl}_3$ )  $\delta$  8.52 (s, 1H), 8.12 (d,  $J = 8.1$  Hz, 1H), 7.94 (d,  $J = 8.3$  Hz, 1H), 4.27 (d,  $J = 6.8$  Hz, 2H), 3.97 (s, 3H), 2.97 (d,  $J = 13.2$  Hz, 1H), 2.82 (d,  $J = 14.1$  Hz, 1H), 2.62 (s, 1H), 2.33 (t,  $J = 11.1$  Hz, 1H), 2.13 – 1.76 (m, 4H), 1.23 (t,  $J = 6.7$  Hz, 3H).  $^{13}\text{C}$  NMR (101 MHz,  $\text{CDCl}_3$ )  $\delta$  201.6, 167.9, 166.5, 165.3, 155.9, 136.6, 127.4, 126.9, 123.2, 122.1, 69.9, 62.8, 52.4, 40.5, 37.6, 26.7, 22.7, 13.9. IR (thin film,  $\text{cm}^{-1}$ ) 3020, 2952, 2400, 1717, 1598, 1465, 1433, 1402, 1286, 1264, 1214, 1114, 1007, 977, 760, 668, 558, 491. HRMS (ESI) calcd for  $\text{C}_{18}\text{H}_{20}\text{NO}_5\text{S}_2^+$  ( $\text{M}+\text{H}^+$ ) 394.07774 found 394.07660. HPLC analysis: Daicel Chiralpak AD-H, hexane/iso-propanol = 95:5, flow rate = 1.0 mL/min,  $\lambda = 216$  nm, retention time: 20.1 min (minor) and 21.5 min (major).

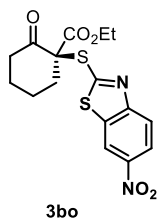

**3bo**: colorless oil, 74% yield, 85% ee.  $[\alpha]_D^{20} = -11.9$  ( $c = 2.7$ ,  $\text{CHCl}_3$ ).  $^1\text{H}$  NMR (400 MHz,  $\text{CDCl}_3$ )  $\delta$  8.71 (s, 1H), 8.31 (d,  $J = 8.3$  Hz, 1H), 7.95 (d,  $J = 8.9$  Hz, 1H), 4.27 (dd,  $J = 13.6, 6.7$  Hz, 2H), 2.99 (d,  $J = 13.3$  Hz, 1H), 2.81 (d,  $J = 14.3$  Hz, 1H), 2.73 – 2.55 (m, 1H), 2.33 (t,  $J = 10.4$  Hz, 1H), 1.97 (dd,  $J = 41.4, 30.4$  Hz, 4H), 1.23 (t,  $J = 6.9$  Hz, 3H).  $^{13}\text{C}$  NMR (101 MHz,  $\text{CDCl}_3$ )  $\delta$  201.3, 168.8, 167.7, 156.6, 144.7, 136.7, 122.3, 121.8, 117.5, 70.3, 62.9, 40.5, 37.6, 26.7, 22.7, 13.9. IR (thin film,  $\text{cm}^{-1}$ ) 3200, 2400, 1718, 1522, 1435, 1341, 1214, 1125, 1049, 929, 744, 668, 627, 557, 493. HRMS (ESI) calcd for  $\text{C}_{16}\text{H}_{17}\text{N}_2\text{O}_5\text{S}_2^+$  ( $\text{M}+\text{H}^+$ ) 381.05734 found 381.05640. HPLC analysis: Daicel Chiralpak OD-H, hexane/iso-propanol = 95:5, flow rate = 1.0 mL/min,  $\lambda = 222$  nm, retention time: 27.6 min (minor) and 30.3 min (major).

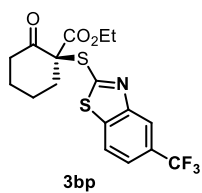

**3bp**: colorless oil, 74% yield, 89% ee.  $[\alpha]_D^{20} = -13.7$  ( $c = 3.0$ ,  $\text{CHCl}_3$ ).  $^1\text{H NMR}$  (400 MHz,  $\text{CDCl}_3$ )  $\delta$  8.17 (s, 1H), 7.90 (d,  $J = 8.4$  Hz, 1H), 7.59 (d,  $J = 8.3$  Hz, 1H), 4.26 (q,  $J = 7.1$  Hz, 2H), 2.95 (d,  $J = 14.2$  Hz, 1H), 2.88 – 2.72 (m, 1H), 2.66 – 2.50 (m, 1H), 2.36 – 2.23 (m, 1H), 2.10 – 1.80 (m, 4H), 1.23 (t,  $J = 7.1$  Hz, 3H).  $^{13}\text{C NMR}$  (101 MHz,  $\text{CDCl}_3$ )  $\delta$  201.6, 167.9, 163.8, 152.7, 140.2, 128.9 (q,  $J = 99$  Hz), 124.1 (d,  $J = 272.3$  Hz), 121.7, 121.5 (d,  $J = 10.2$  Hz), 119.7 (d,  $J = 12.6$  Hz). 69.9, 62.8, 40.5, 37.6, 26.7, 22.7, 13.9.  $^{19}\text{F NMR}$  (376 MHz,  $\text{CDCl}_3$ )  $\delta$  -61.79 (s). IR (thin film,  $\text{cm}^{-1}$ ) 3020, 2400, 1718, 1338, 1214, 1175, 1130, 1058, 989, 918, 745, 668, 627, 553. HRMS (ESI) calcd for  $\text{C}_{17}\text{H}_{17}\text{F}_3\text{NO}_3\text{S}_2^+$  ( $\text{M}+\text{H}^+$ ) 404.05965 found 404.05850. HPLC analysis: Daicel Chiralpak AD-H, hexane/iso-propanol = 95:5, flow rate = 1.0 mL/min,  $\lambda = 281$  nm, retention time: 8.3 min (major) and 9.0 min (minor).

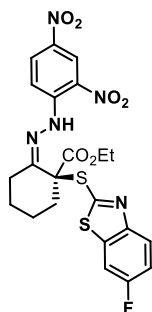

**3bh-1**: red solid, 74% yield, 91% ee.  $^1\text{H NMR}$  (400 MHz,  $\text{CDCl}_3$ )  $\delta$  11.20 (s, 1H), 9.06 (d,  $J = 1.8$  Hz, 1H), 8.24 (d,  $J = 9.5$  Hz, 1H), 7.87 (dd,  $J = 8.8, 4.8$  Hz, 1H), 7.79 (d,  $J = 9.5$  Hz, 1H), 7.56 – 7.36 (m, 1H), 7.15 (dd,  $J = 12.3, 5.4$  Hz, 1H), 4.27 (dt,  $J = 13.5, 6.8$  Hz, 2H), 3.04 – 2.74 (m, 2H), 2.54 – 2.29 (m, 1H), 2.28 – 2.12 (m, 1H), 2.07 – 1.65 (m, 4H), 1.22 (t,  $J = 7.0$  Hz, 3H).  $^{13}\text{C NMR}$  (101 MHz,  $\text{CDCl}_3$ )  $\delta$  169.4, 160.7 (d,  $J = 247.6$  Hz), 159.9 (d,  $J = 3.3$  Hz), 154.5, 149.8 (d,  $J = 1.5$  Hz), 144.9, 138.5 (t,  $J = 5.5$  Hz), 130.0, 129.7, 124.1 (d,  $J = 9.4$  Hz), 123.2, 116.7, 115.1 (d,  $J = 24.9$  Hz), 107.3 (d,  $J = 26.7$  Hz), 65.7, 62.6, 36.6, 25.6, 25.1, 22.5, 14.1.  $^{19}\text{F NMR}$  (376 MHz,  $\text{CDCl}_3$ )  $\delta$  -114.60 (s). IR (thin film,  $\text{cm}^{-1}$ ) 2254, 1729, 1618, 1594, 1519, 1505, 1468, 1339, 1294, 1259, 1197, 1160, 1112, 903, 722, 650, 542. HRMS (ESI) calcd for  $\text{C}_{22}\text{H}_{21}\text{FN}_5\text{O}_6\text{S}_2^+$  ( $\text{M}+\text{H}^+$ ) 534.09118 found 534.09445. HPLC analysis: Daicel Chiralpak AS-

H, hexane/iso-propanol = 97:3, flow rate = 0.8 mL/min,  $\lambda$  = 222 nm, retention time: 35.4 min (minor) and 40.7 min (major).

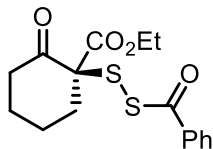

**3bq**

**3bq**: white solid. 17% yield, 90% ee.  $[\alpha]_D^{20} = 34.1$  ( $c = 0.8$ ,  $\text{CHCl}_3$ ).  $^1\text{H}$  NMR (400 MHz,  $\text{CDCl}_3$ )  $\delta$  7.97 (d,  $J = 7.9$  Hz, 2H), 7.61 (t,  $J = 7.4$  Hz, 1H), 7.47 (t,  $J = 7.7$  Hz, 2H), 4.23 (ddq,  $J = 14.6, 7.4, 3.6$  Hz, 2H), 2.97-2.80 (m, 1H), 2.71 (dd,  $J = 14.1, 4.0$  Hz, 1H), 2.49-2.37 (m, 1H), 2.12-1.96 (m, 1H), 1.91-1.58 (m, 4H), 1.29 (t,  $J = 7.1$  Hz, 3H).  $^{13}\text{C}$  NMR (101 MHz,  $\text{CDCl}_3$ )  $\delta$  203.20 (s), 188.81 (s), 167.12 (s), 135.57 (s), 134.1, 128.9, 127.8, 67.4, 62.6, 40.6, 36.3, 26.9, 22.9, 13.9. IR (thin film,  $\text{cm}^{-1}$ ) 2927, 2866, 2369, 1713, 1698, 1448, 1264, 1243, 1204, 1176, 1126, 1096, 1021, 884, 736, 703, 679, 646, 551, 509, 442. HRMS (ESI) calcd for  $\text{C}_{16}\text{H}_{18}\text{NaO}_4\text{S}_2^+$  ( $\text{M}+\text{Na}^+$ ) 361.05387 found 361.05240. HPLC analysis: Daicel Chiralpak AD-H, hexane/iso-propanol = 95:5, flow rate = 1.0 mL/min,  $\lambda$  = 240 nm, retention time: 11.7 min (major) and 13.9 min (minor).

## 7. NMR spectra

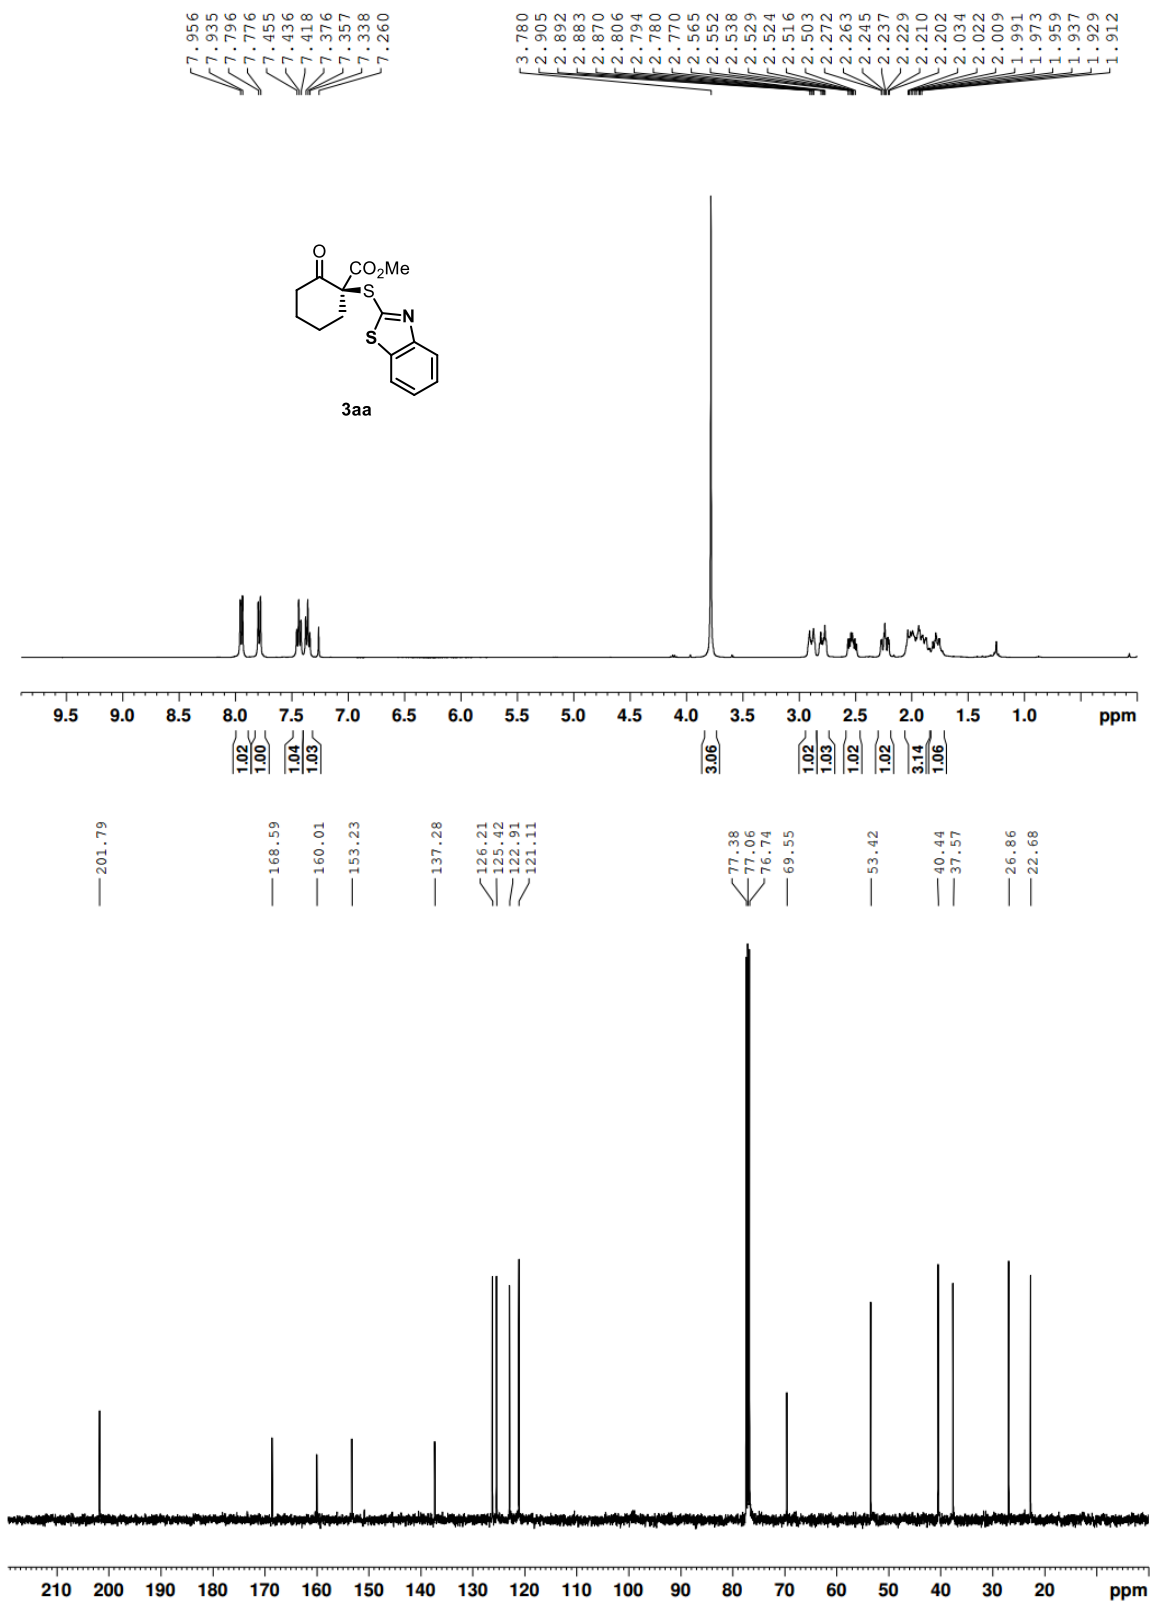



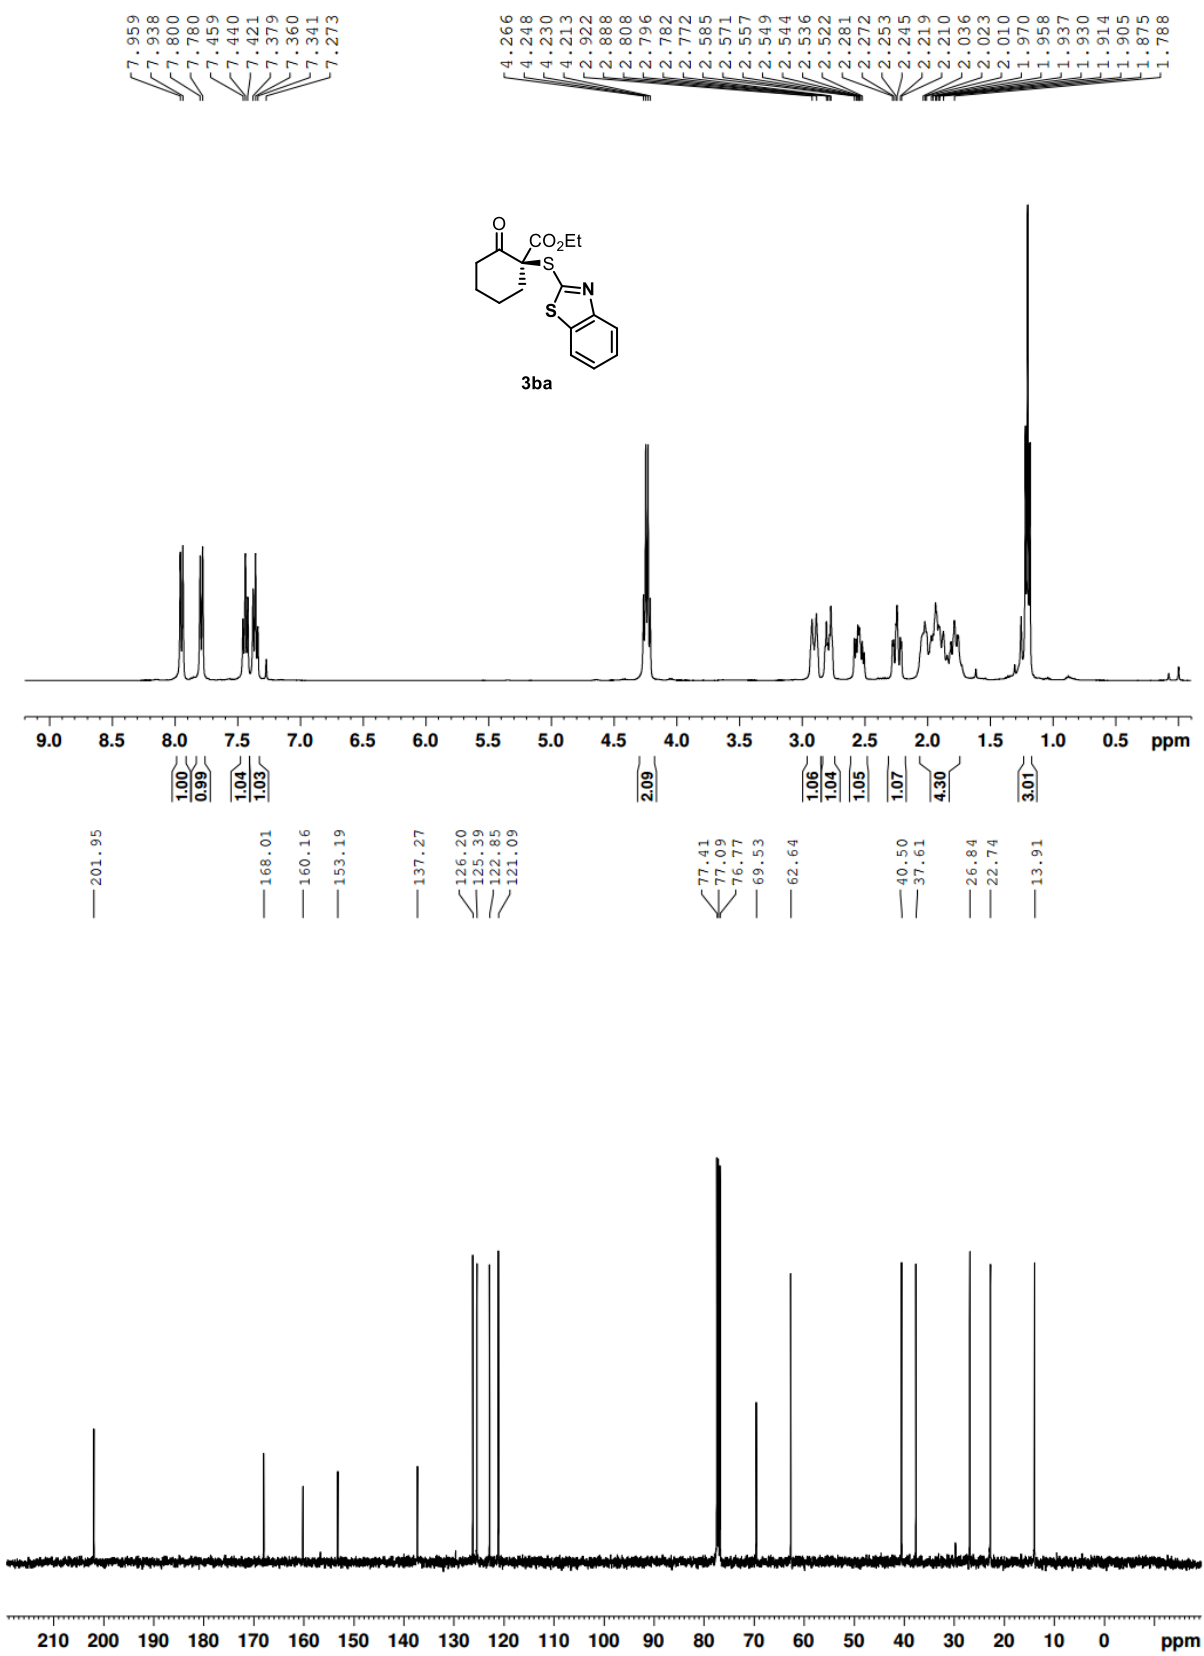

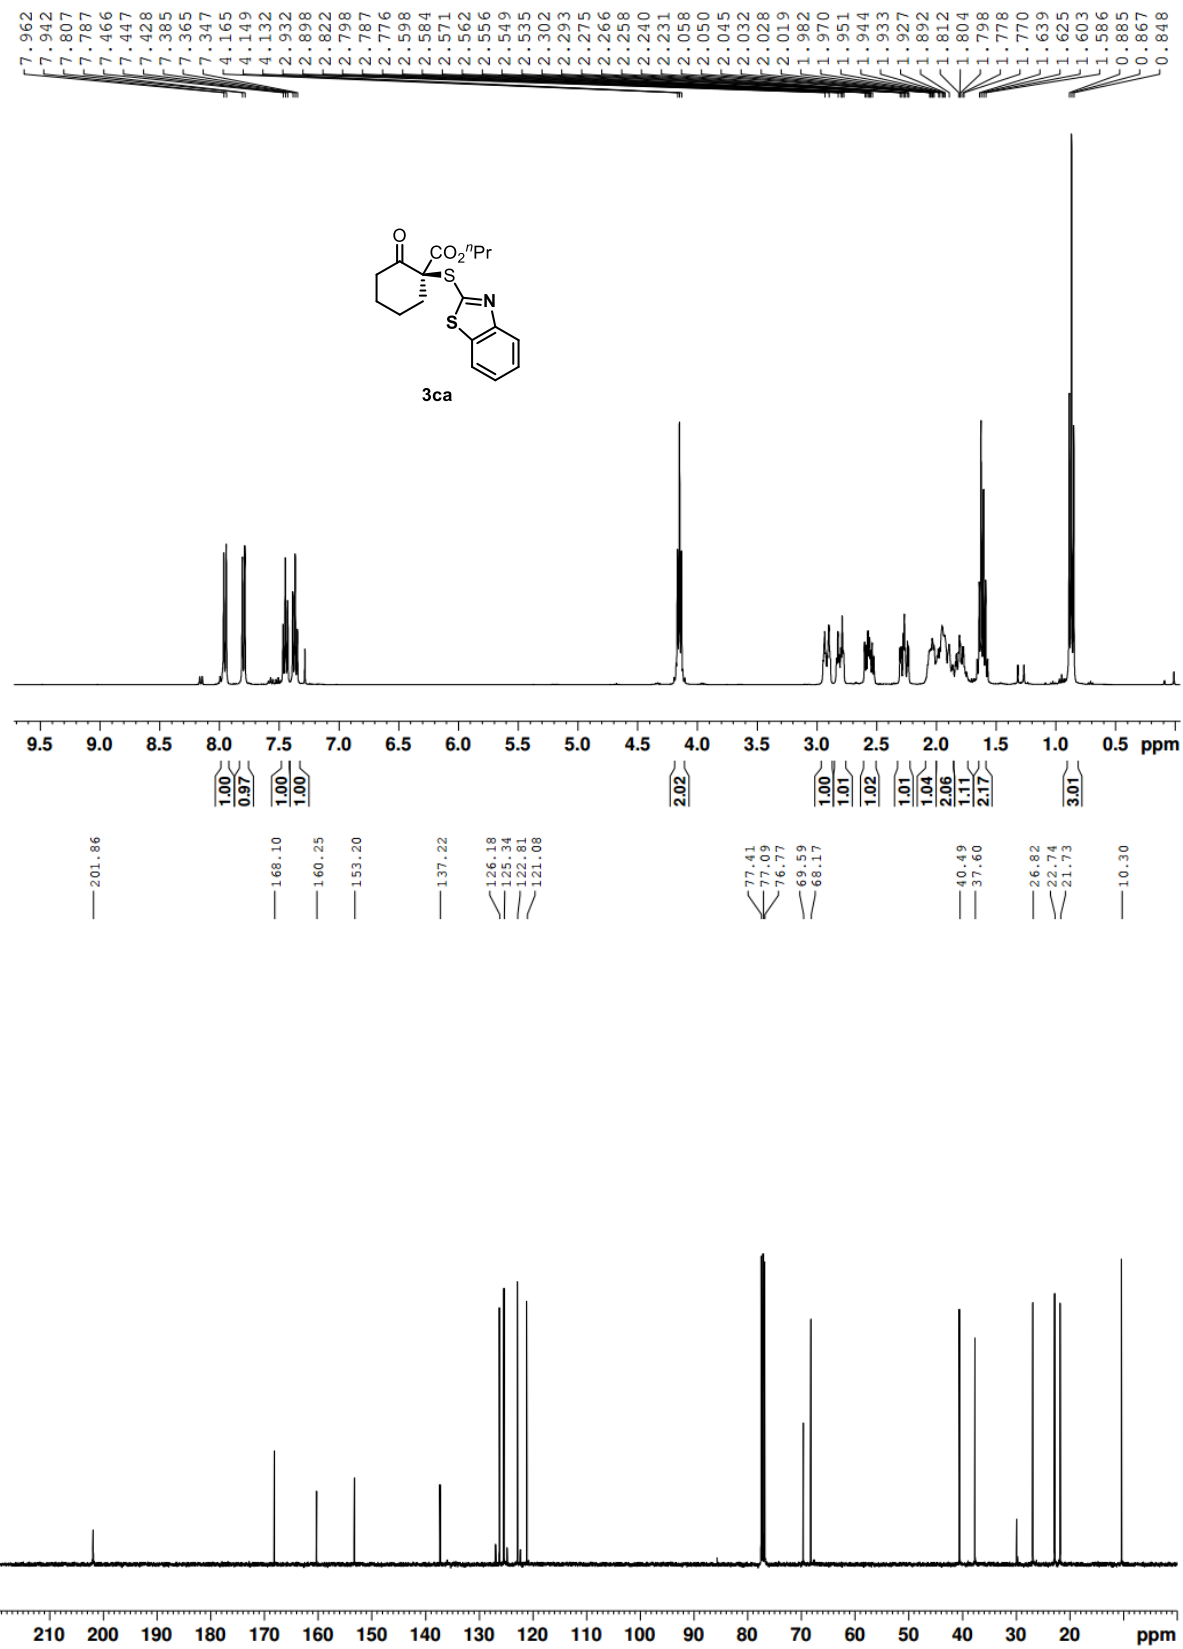

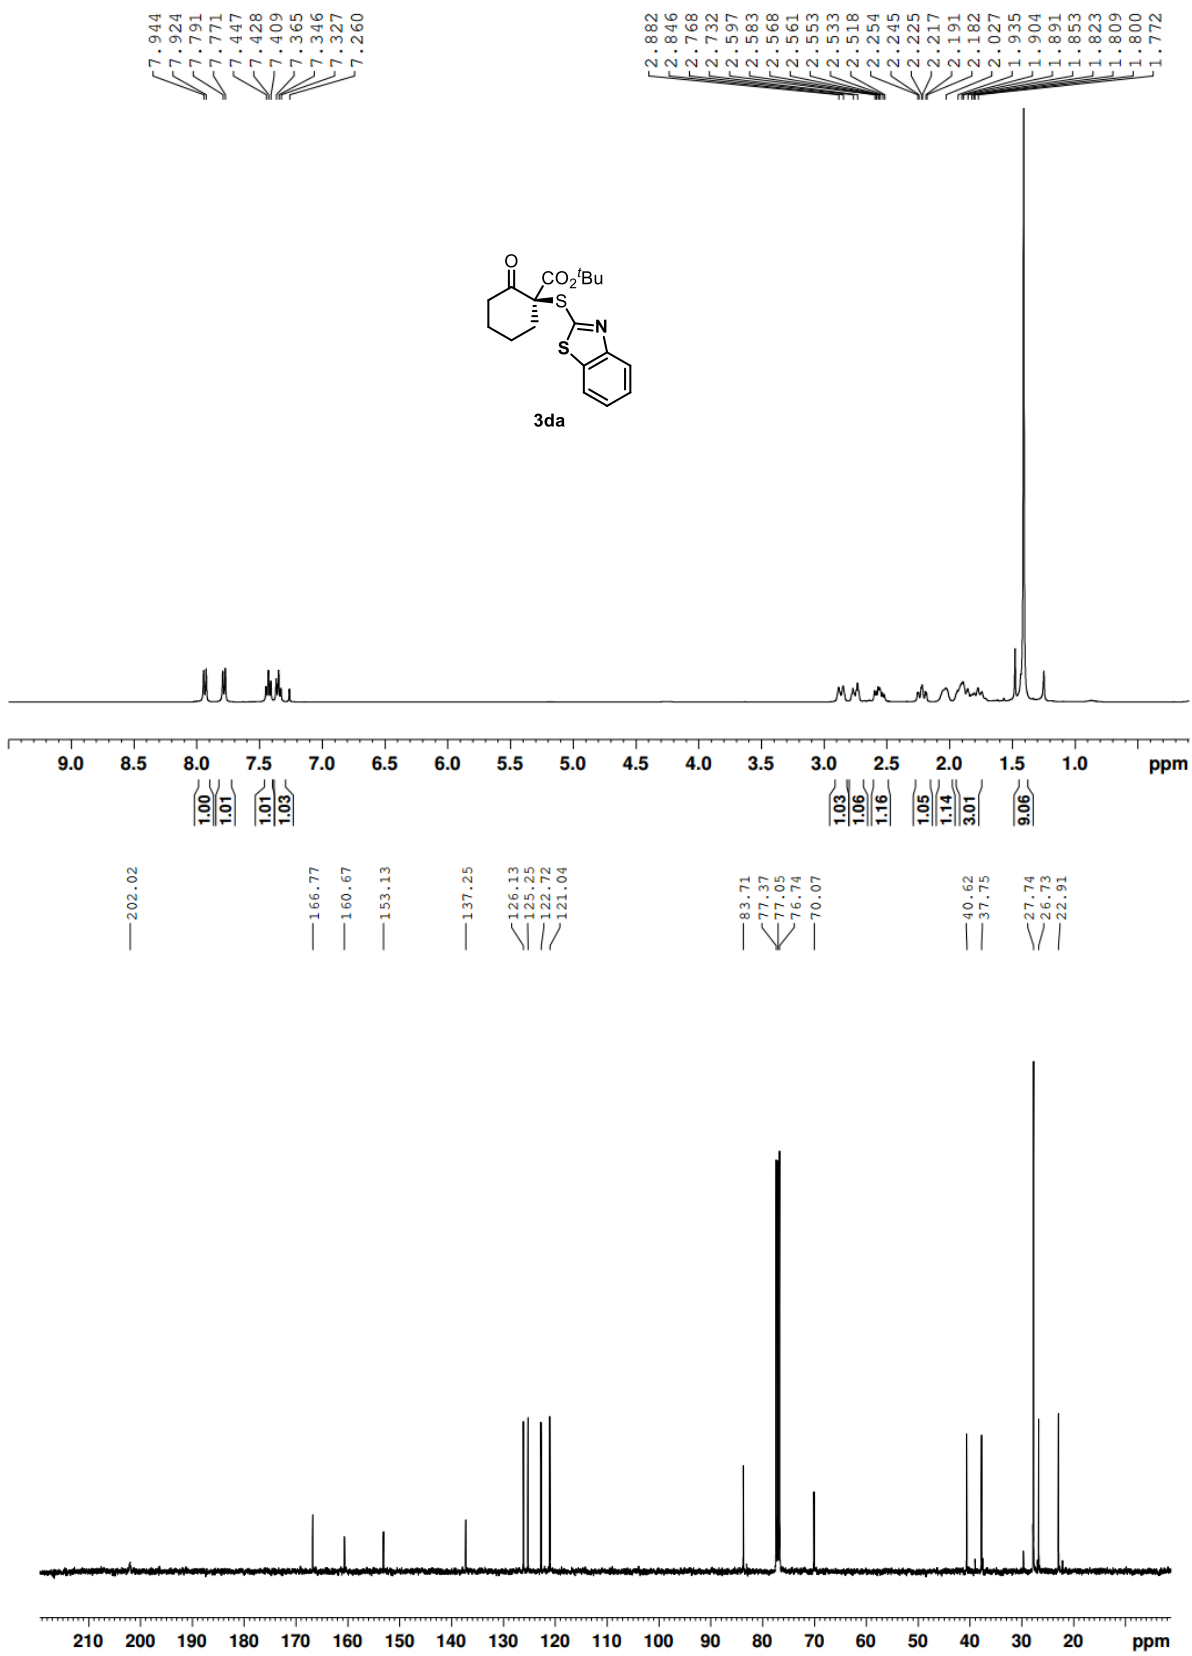

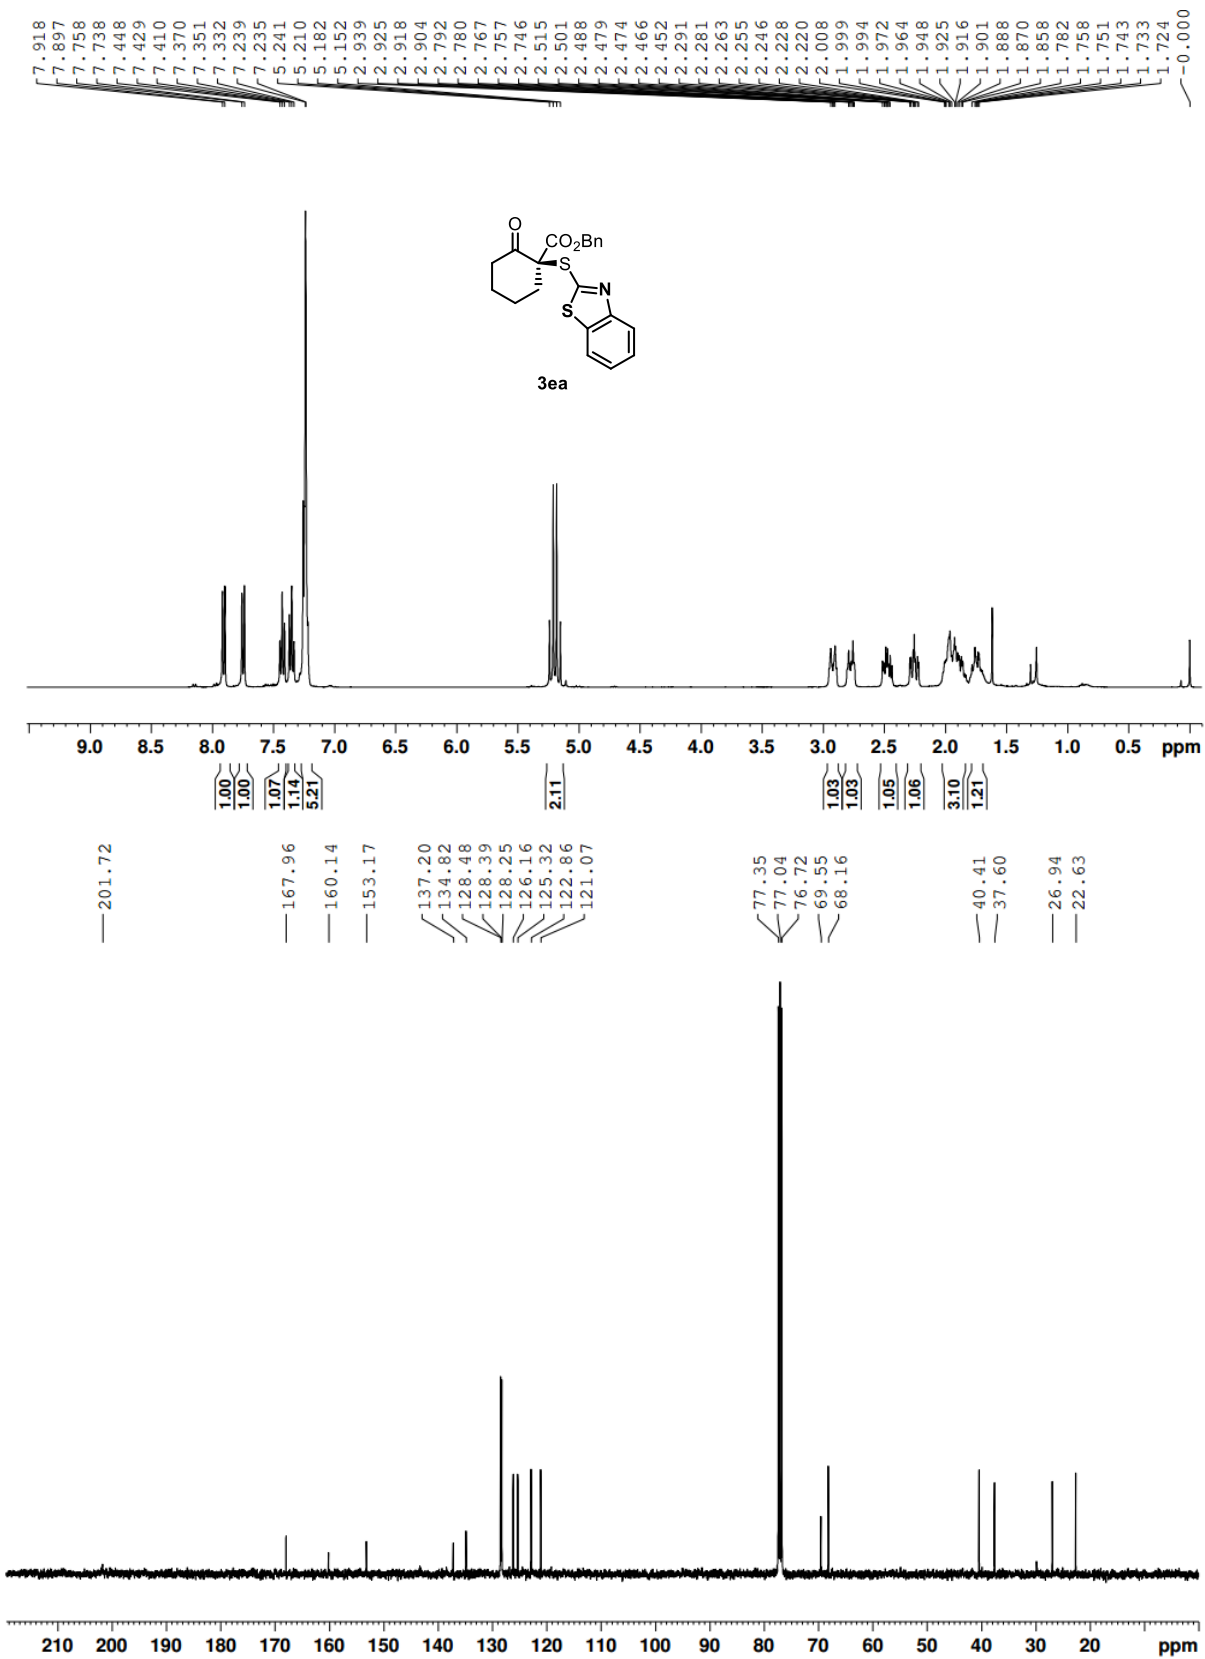

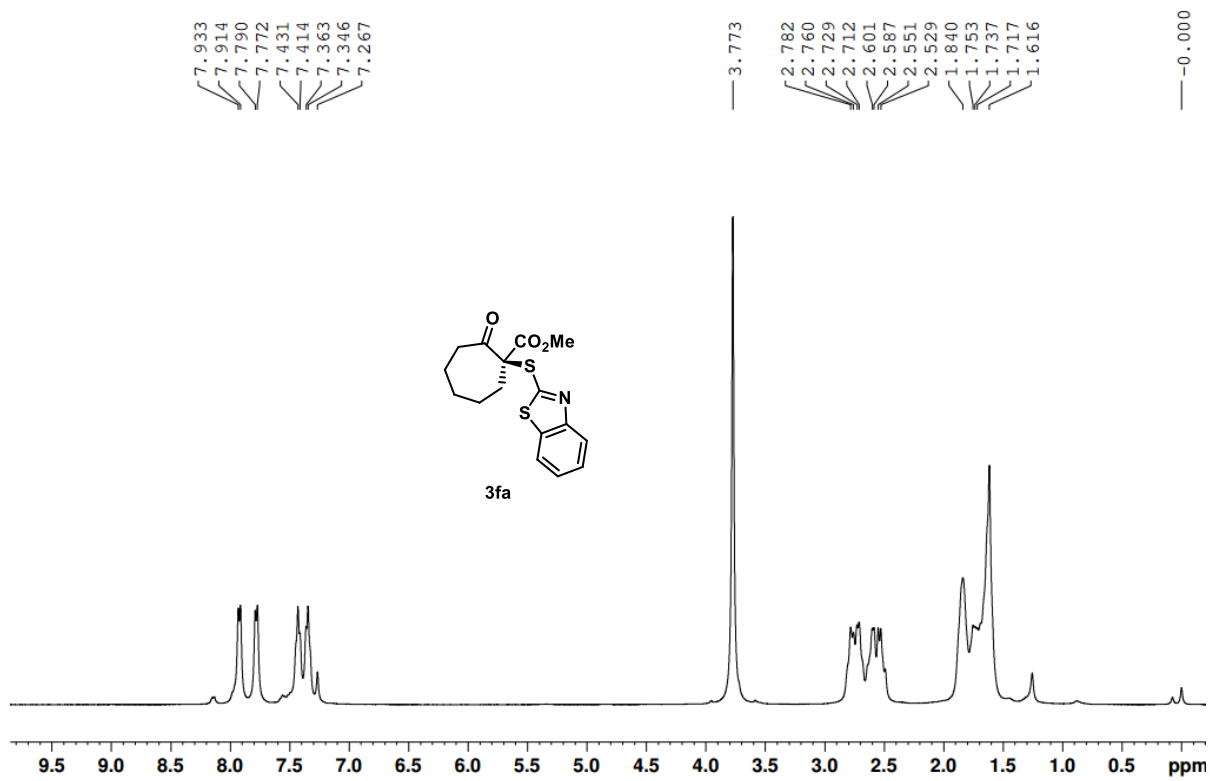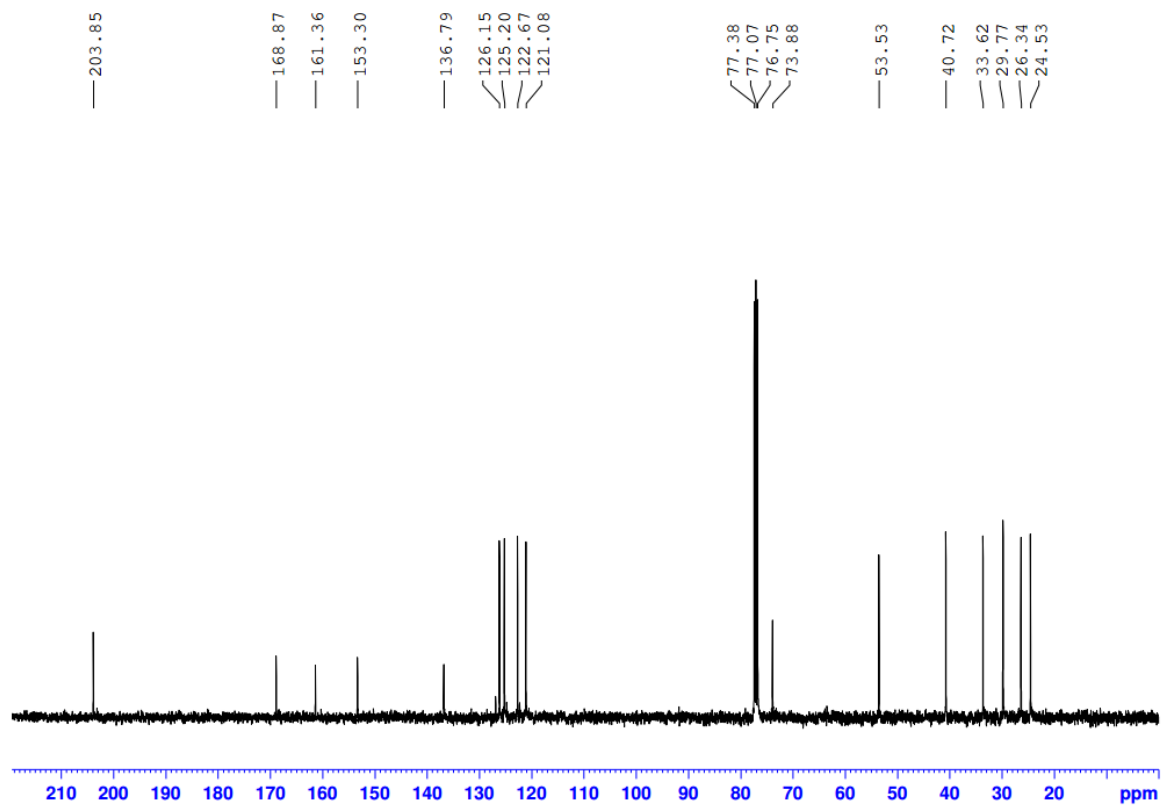

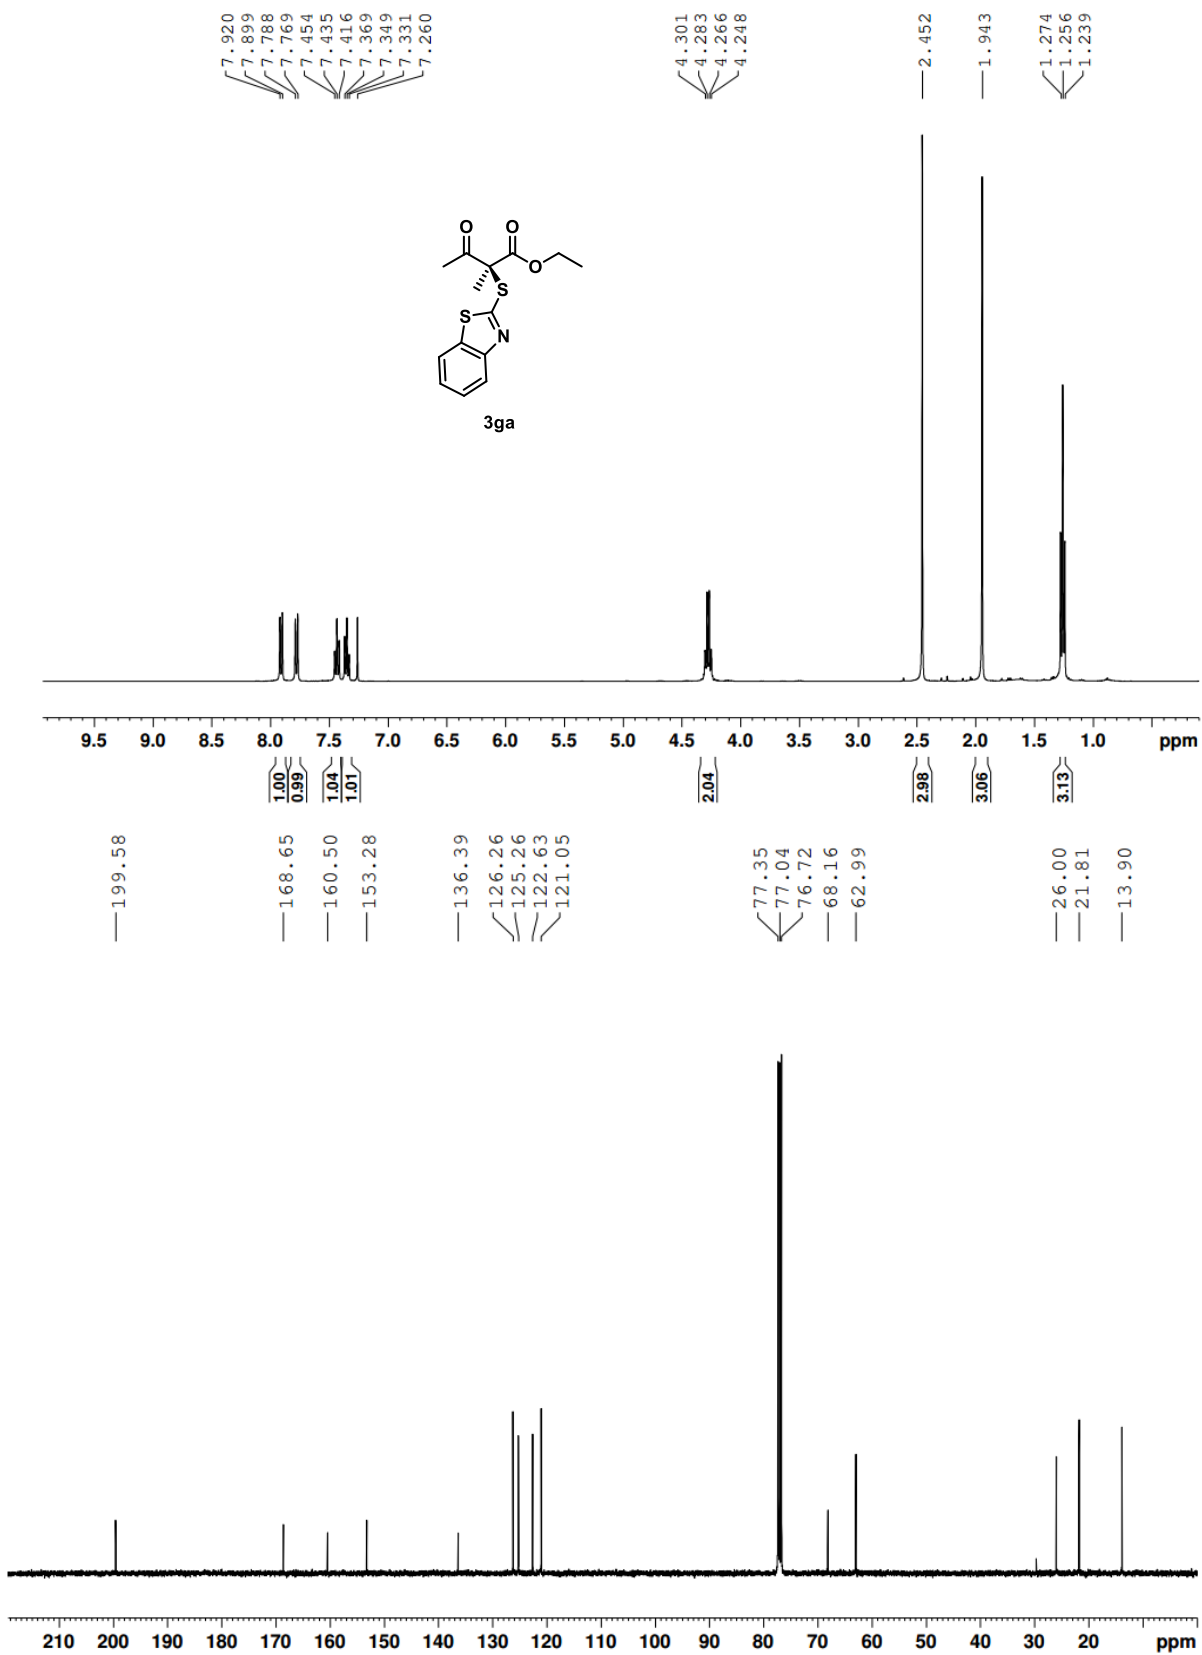

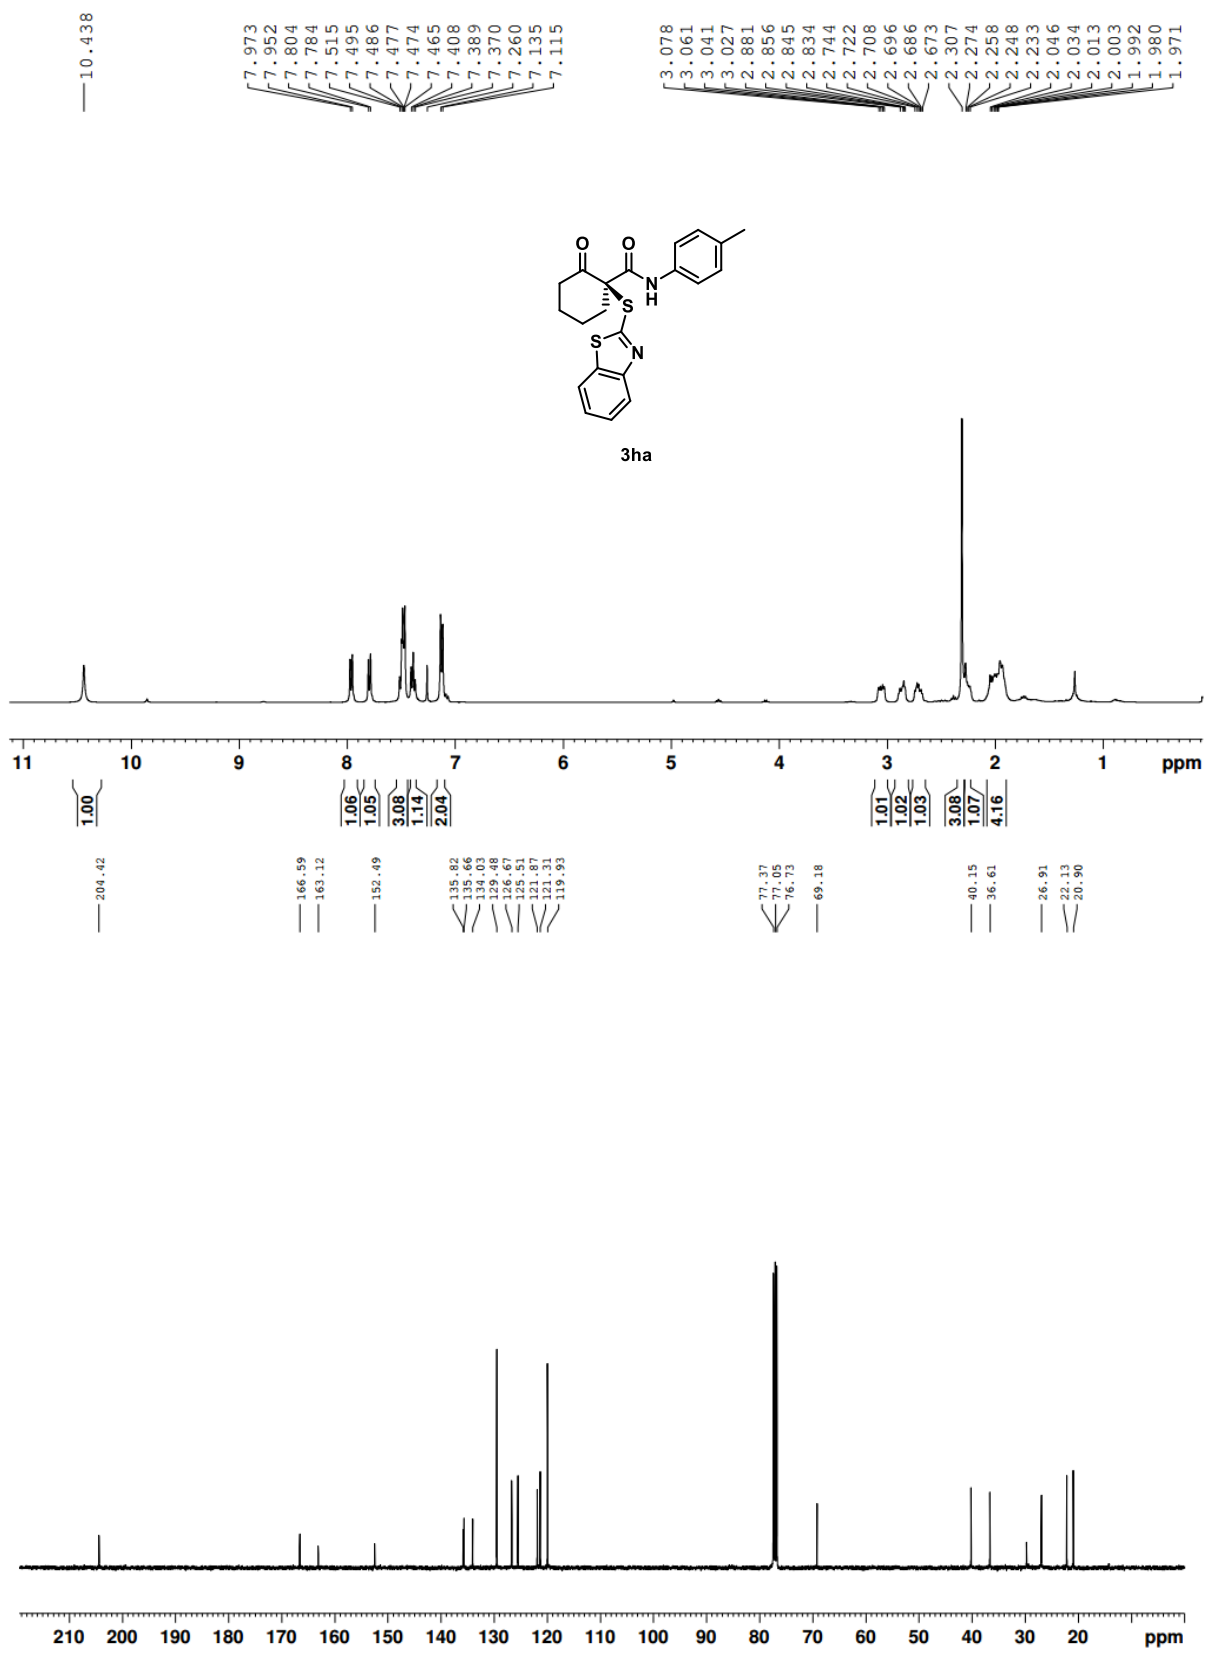

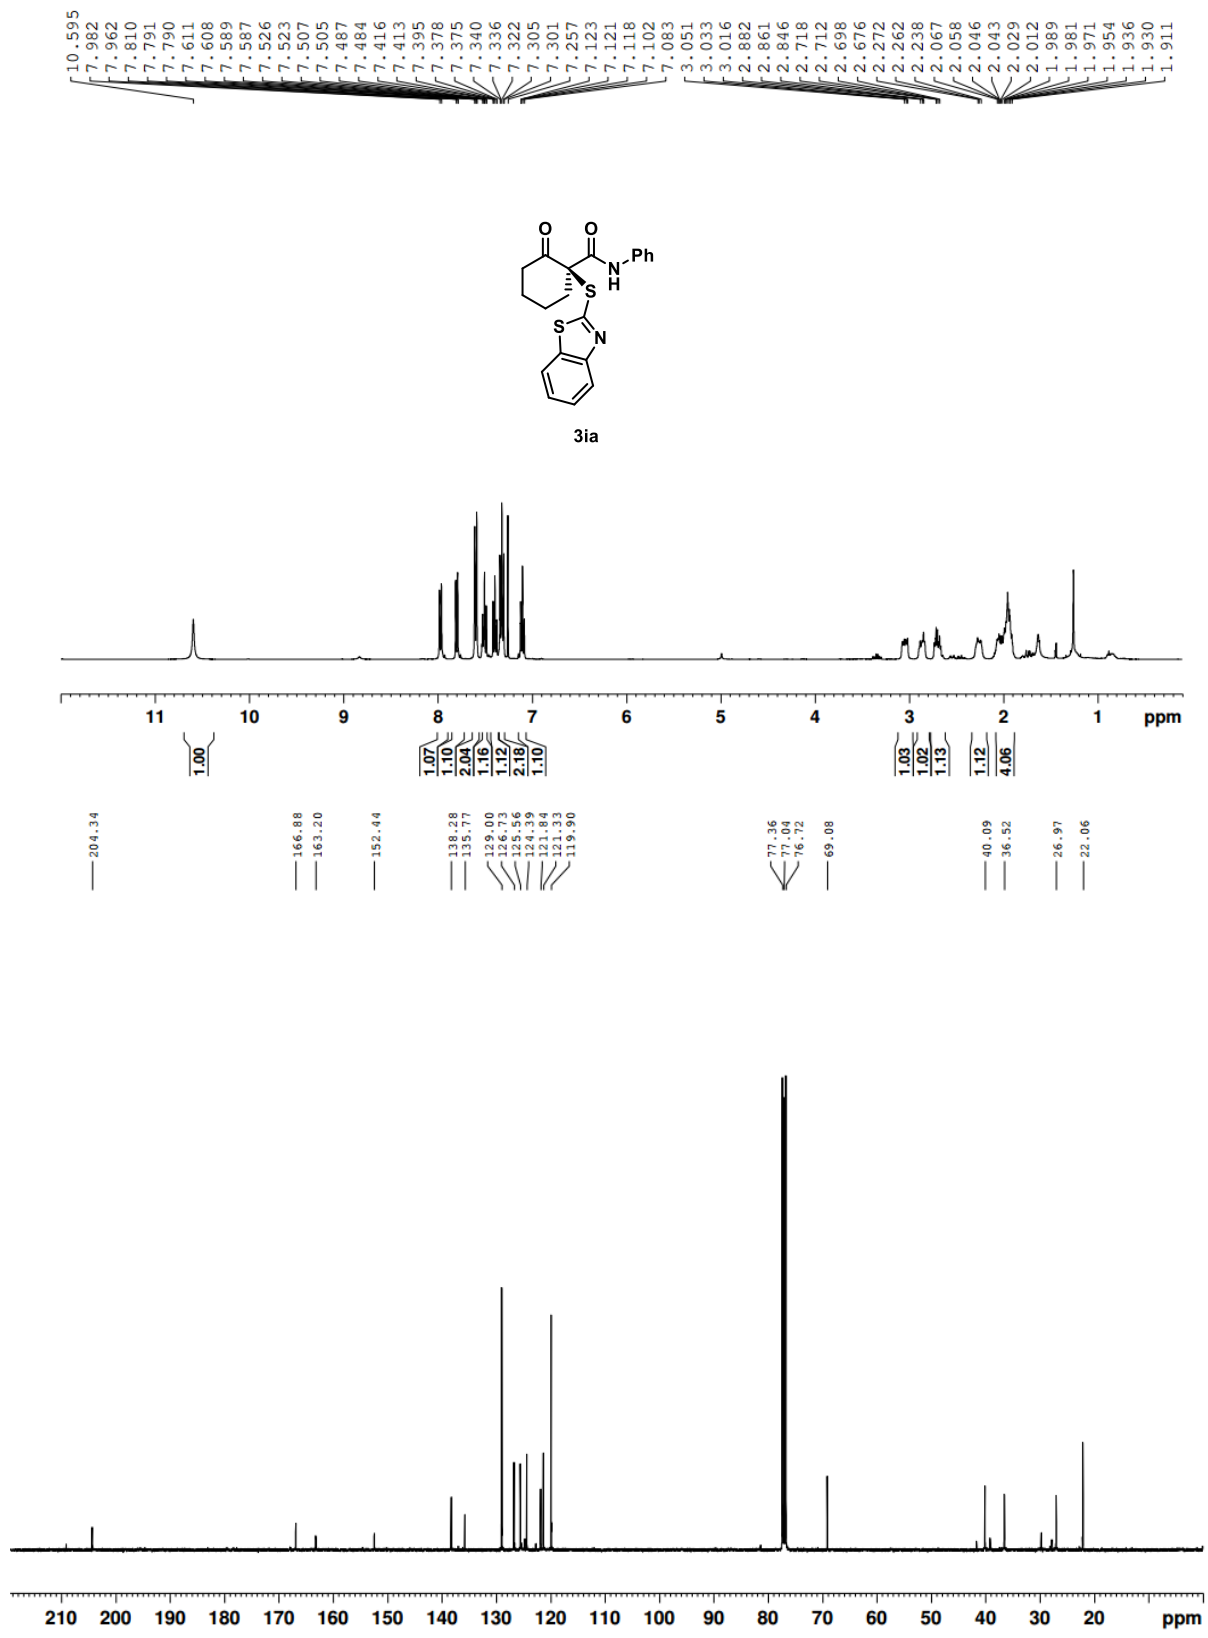



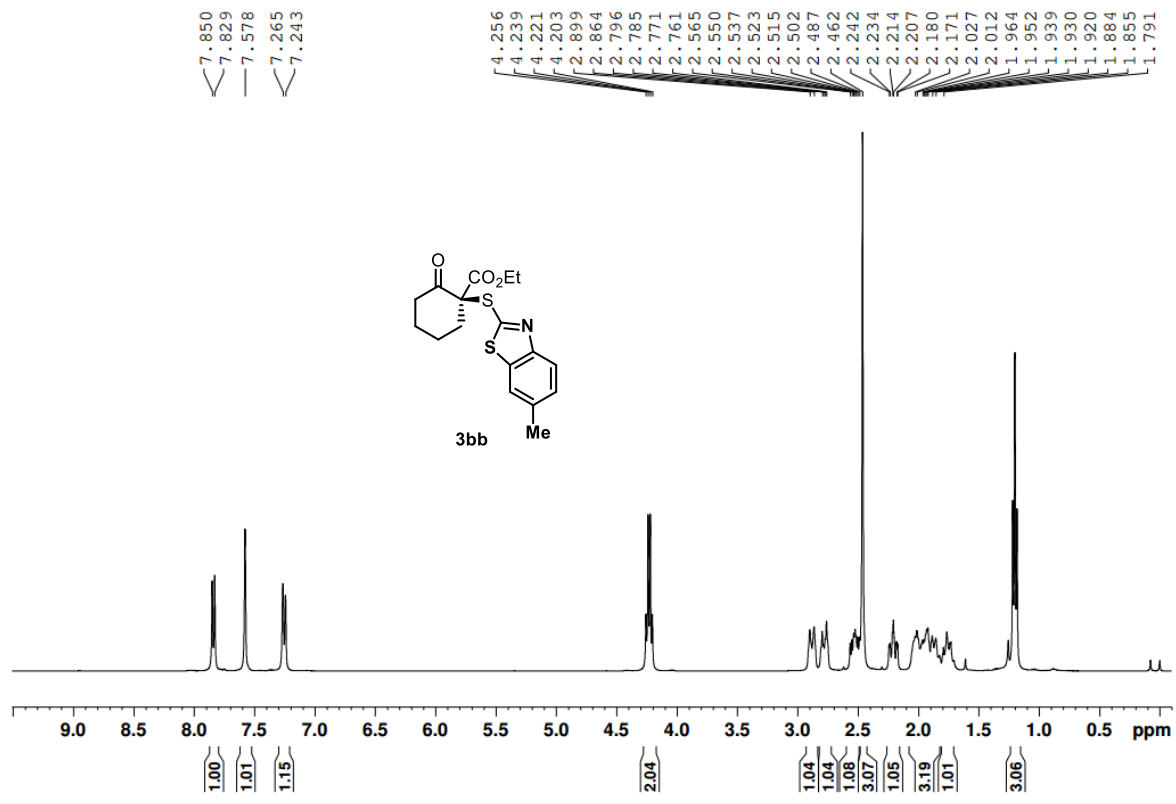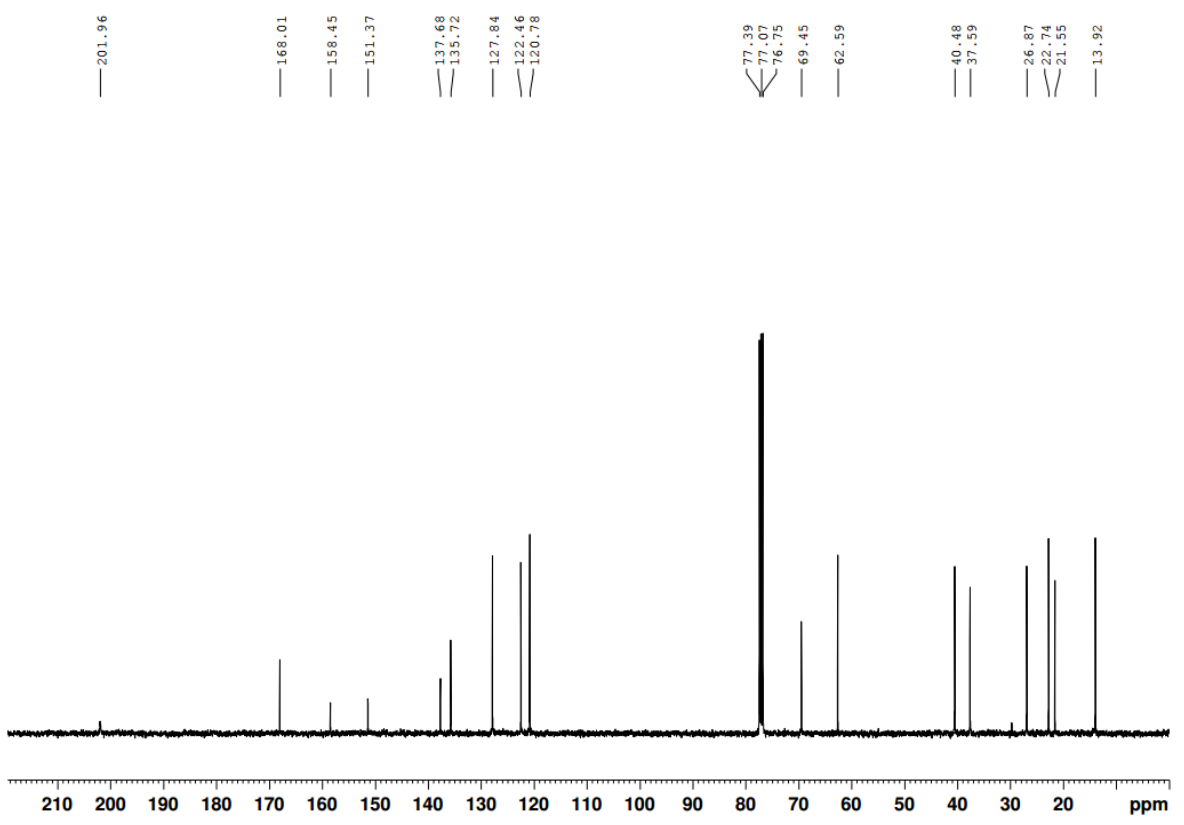

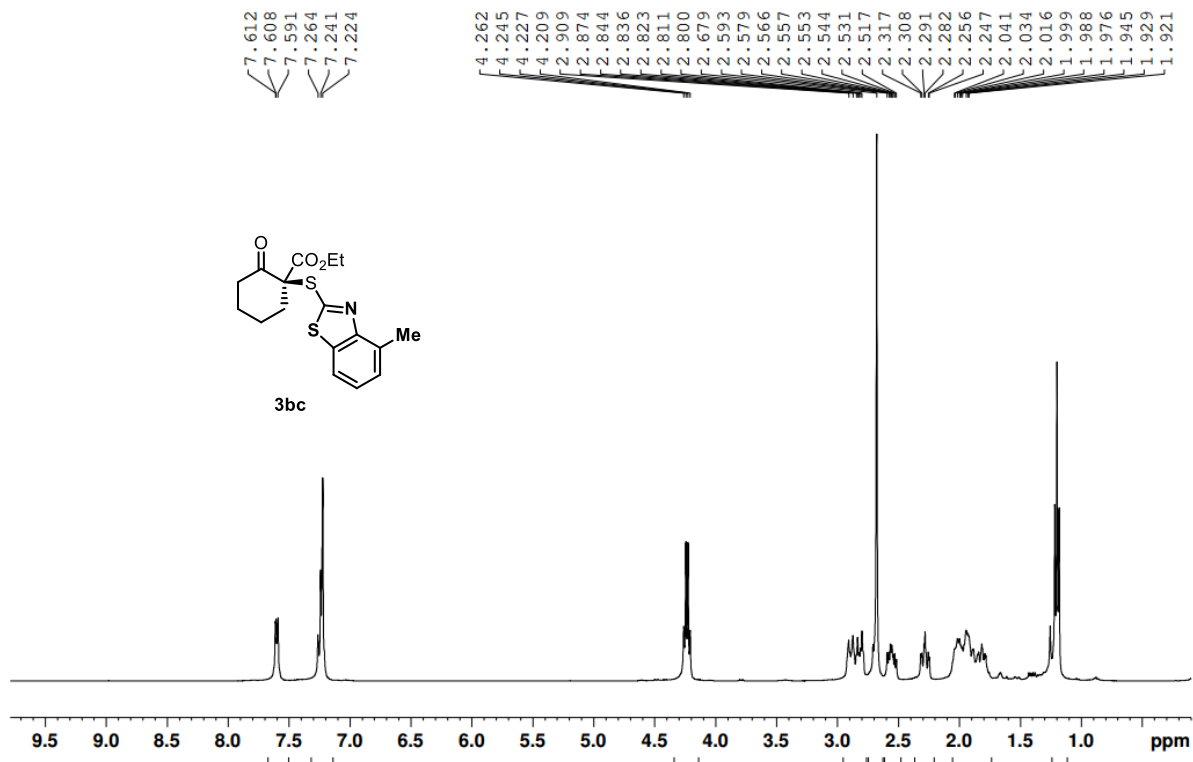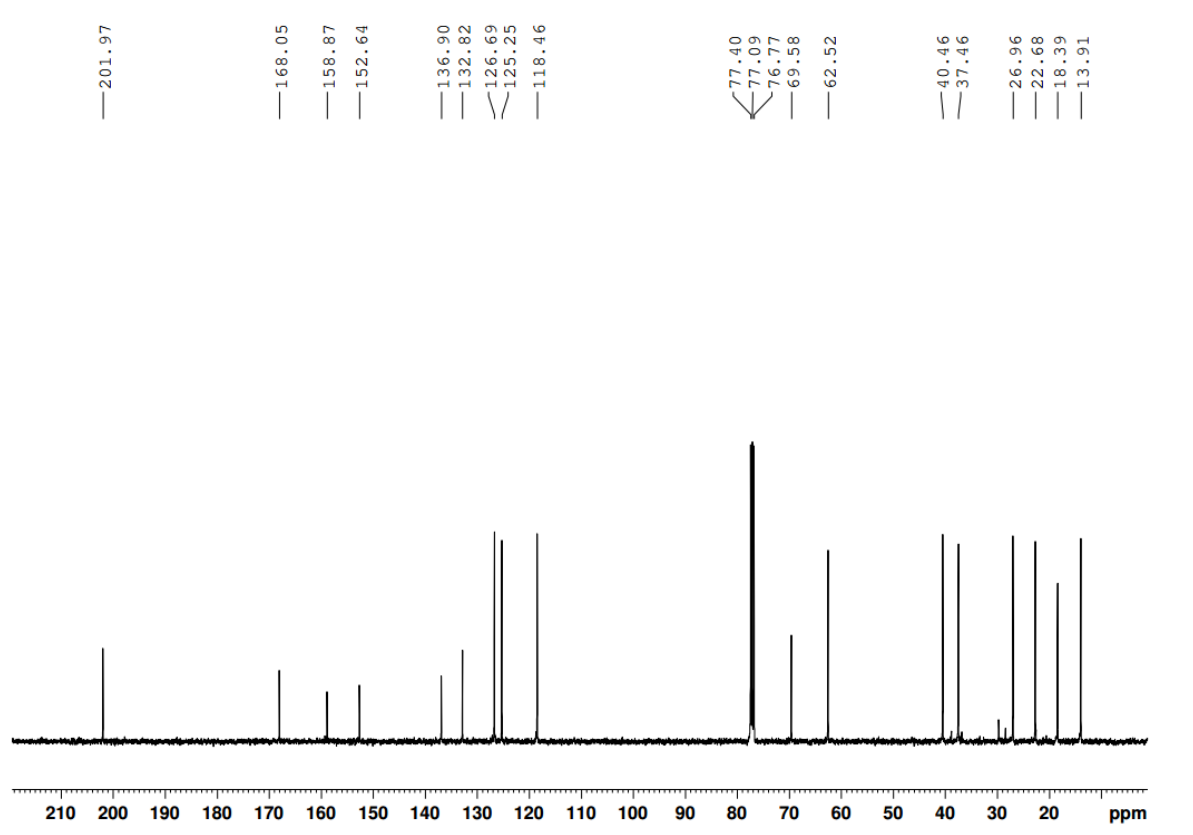

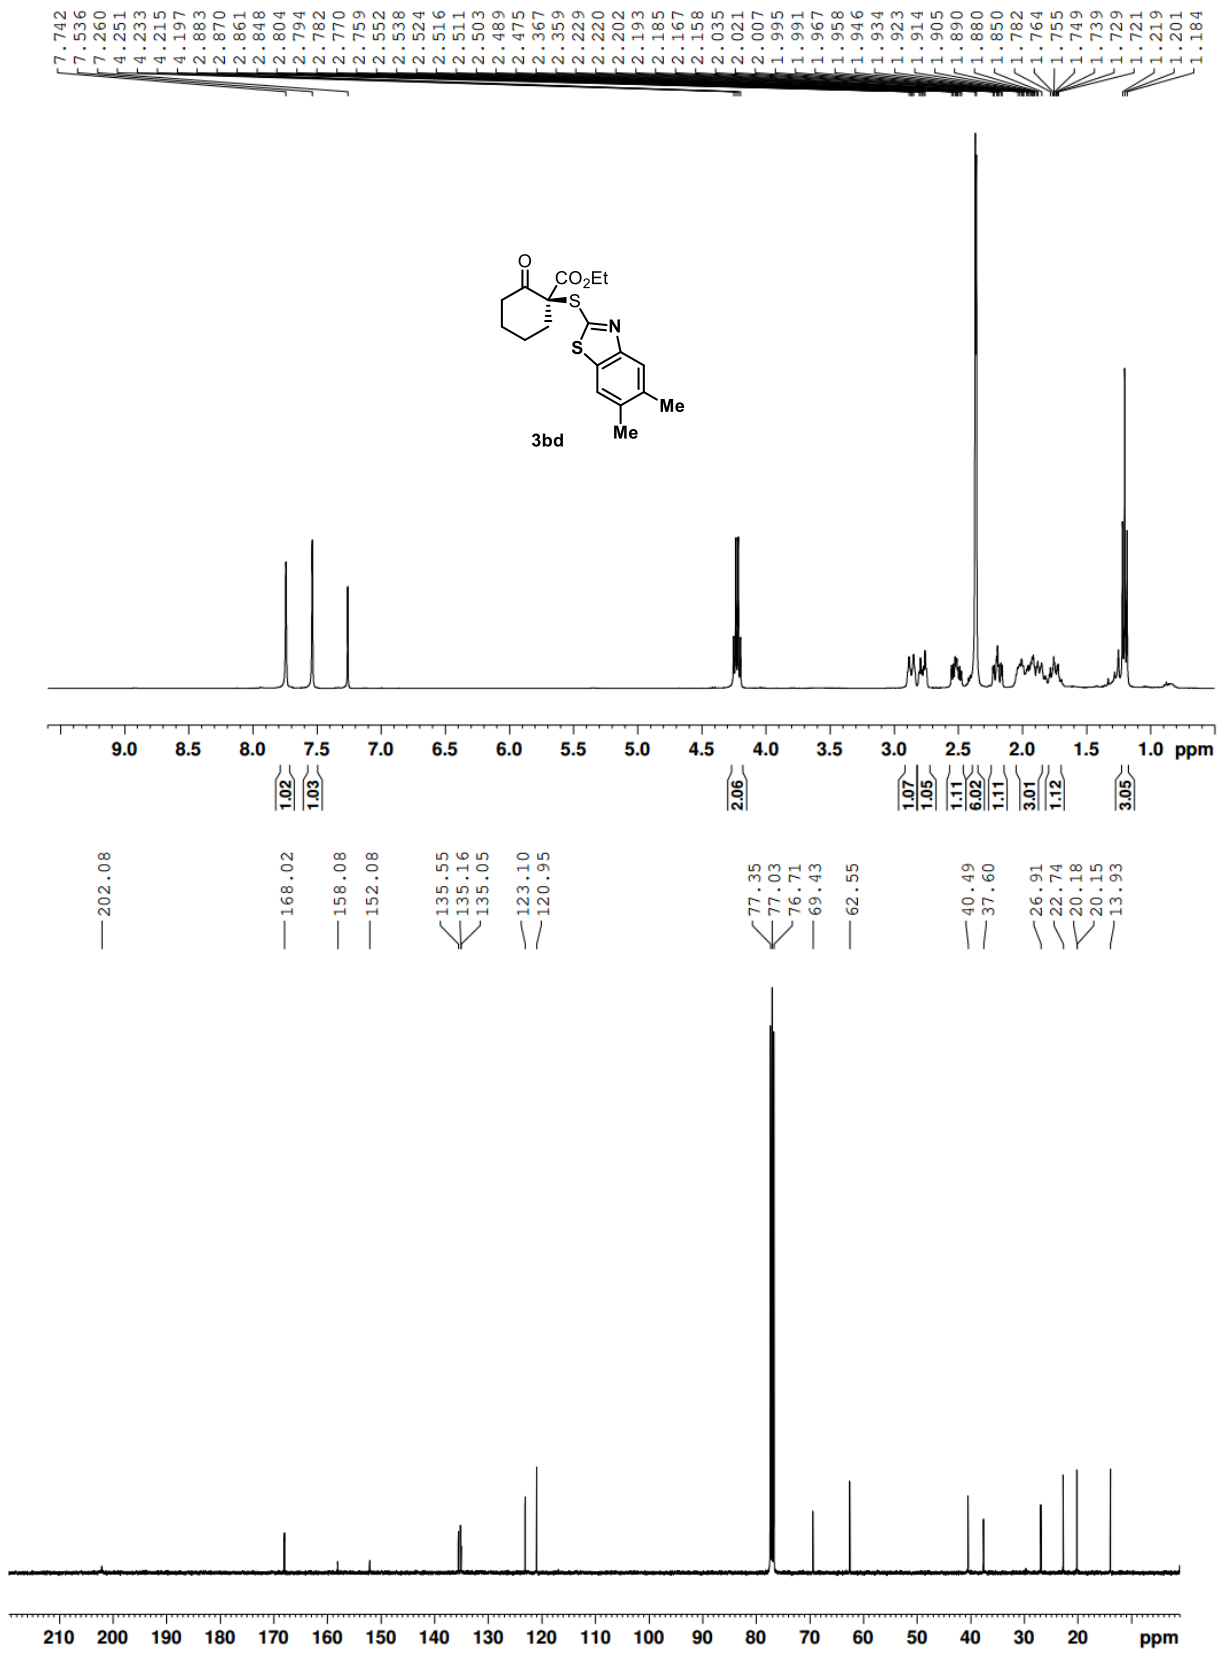

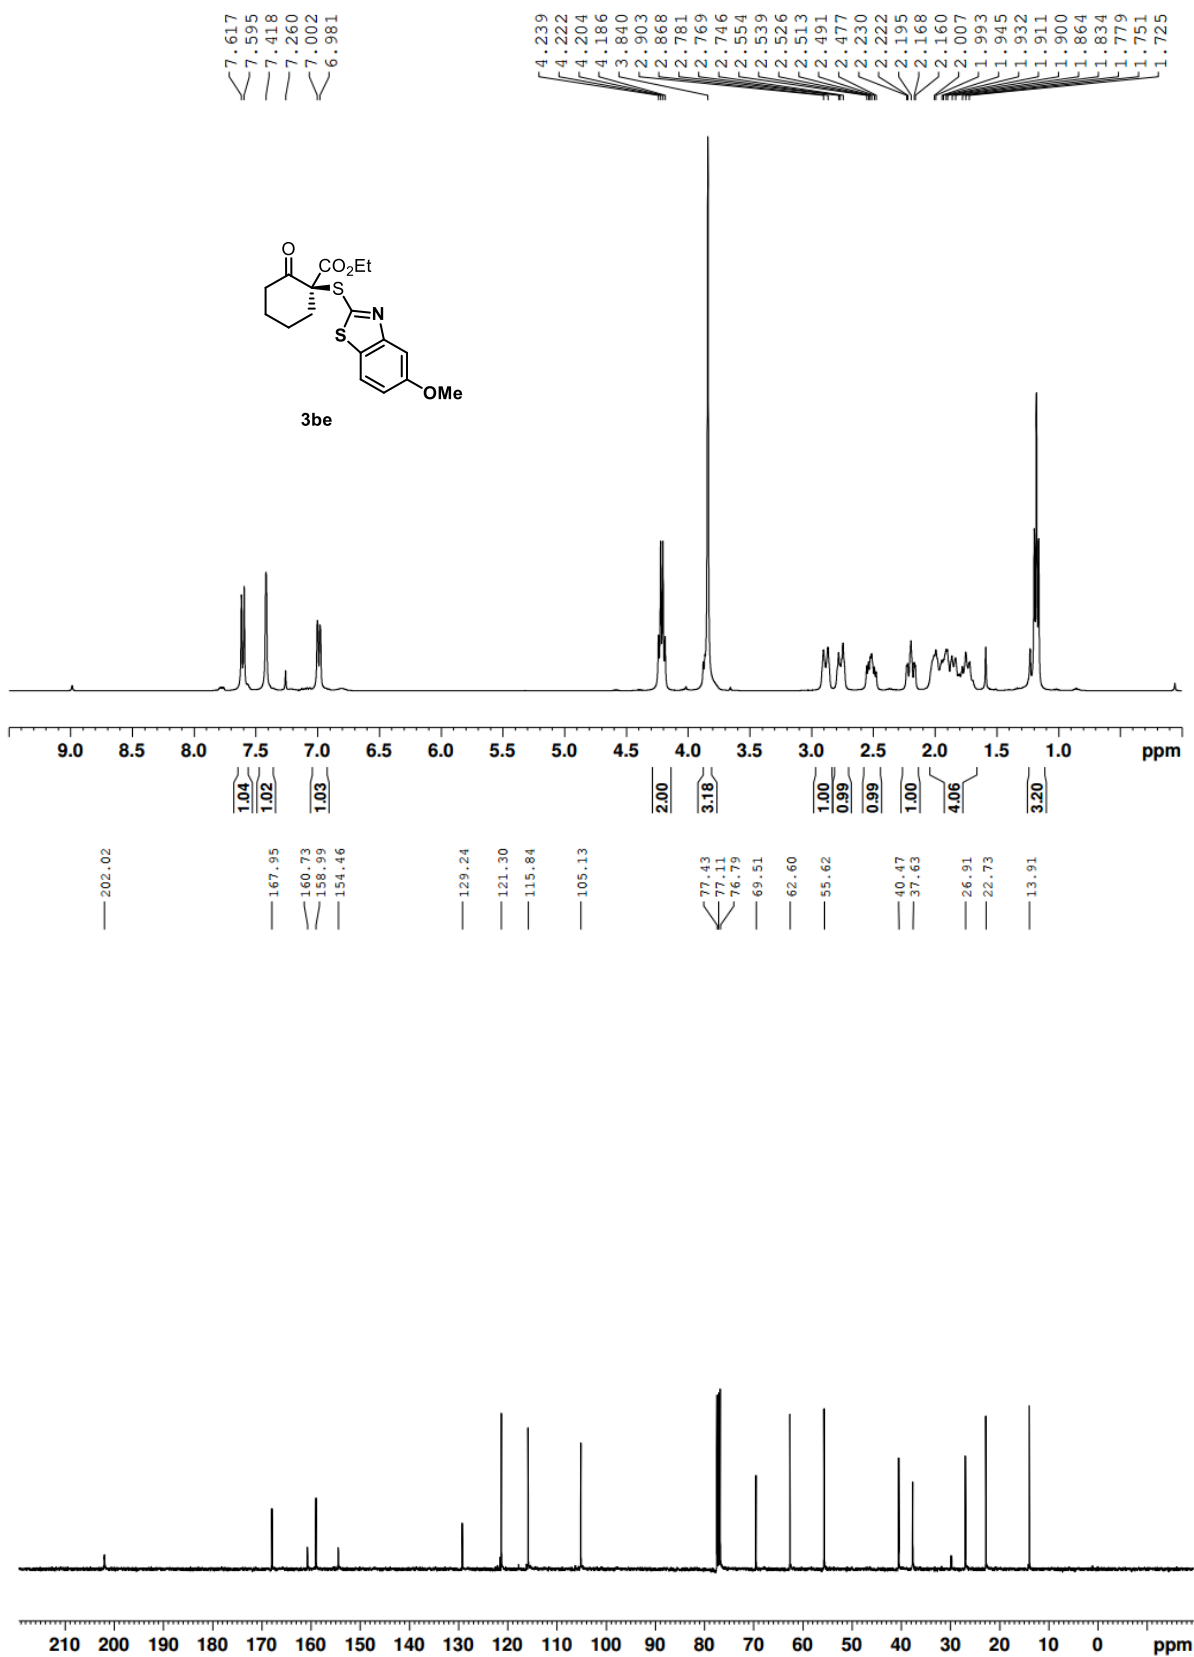

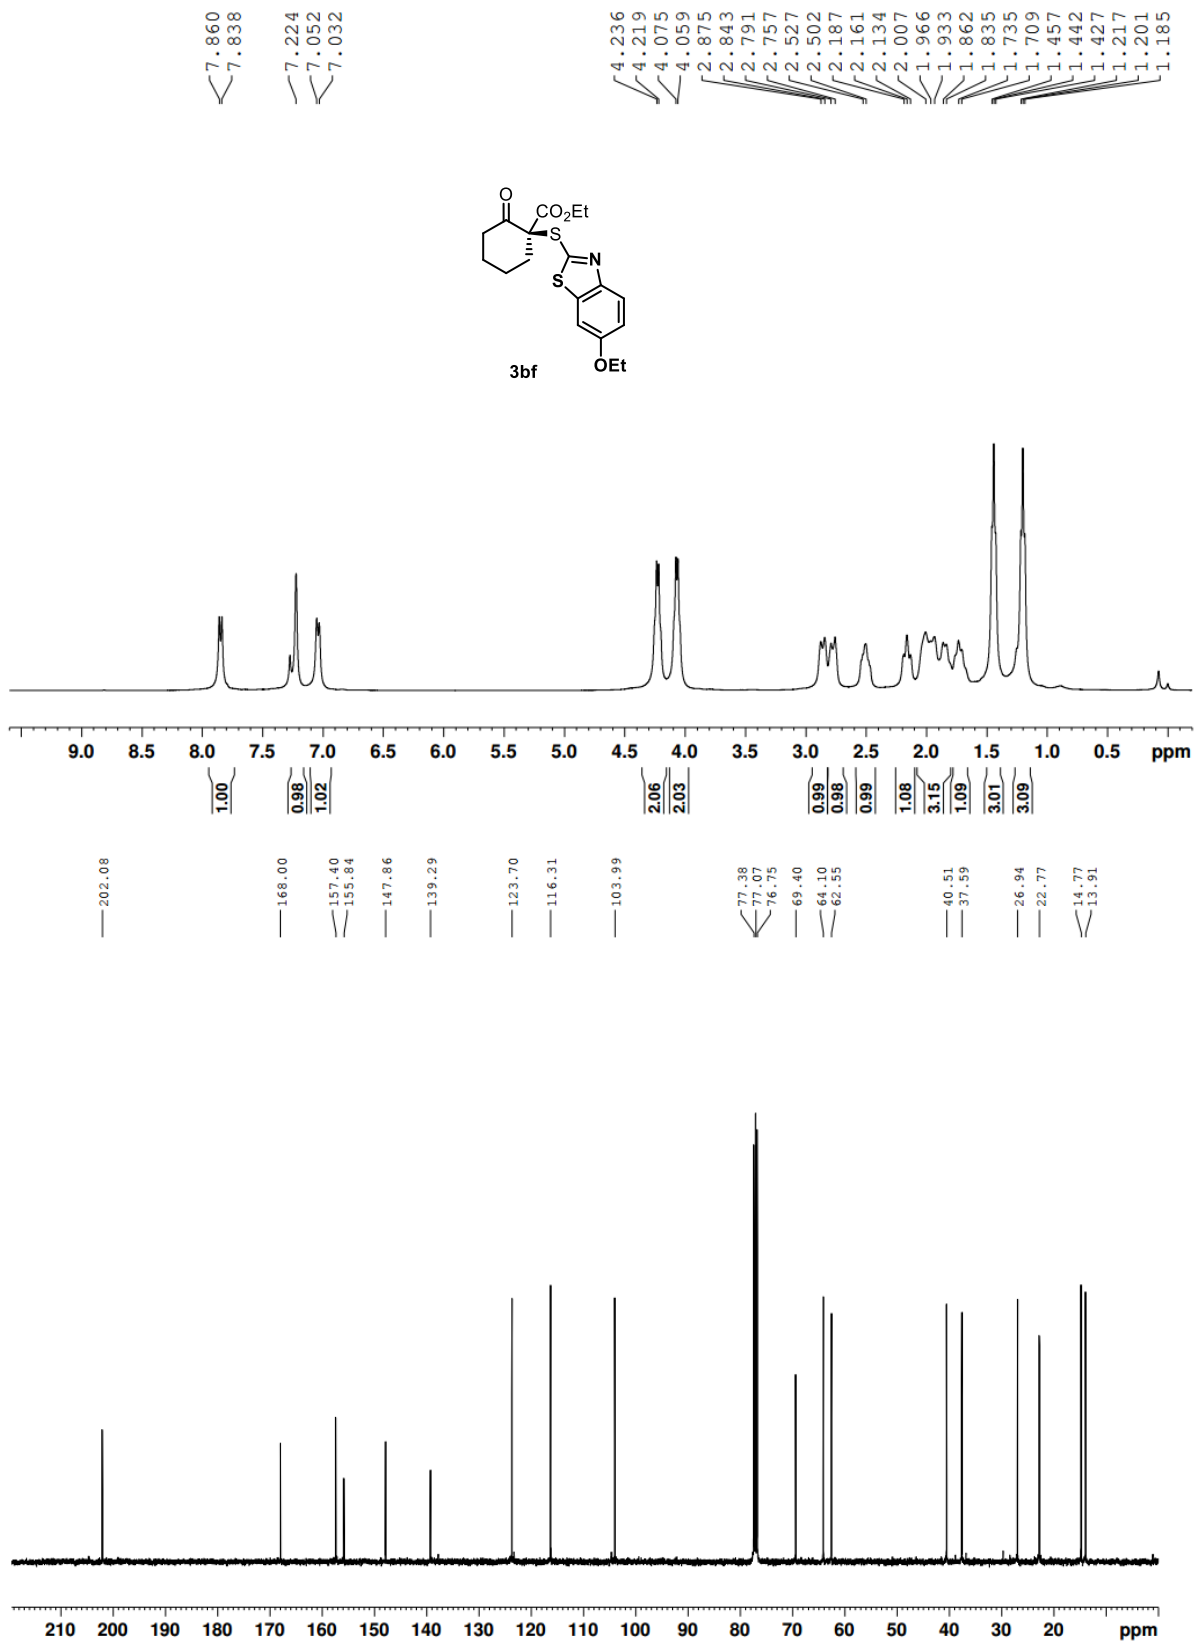

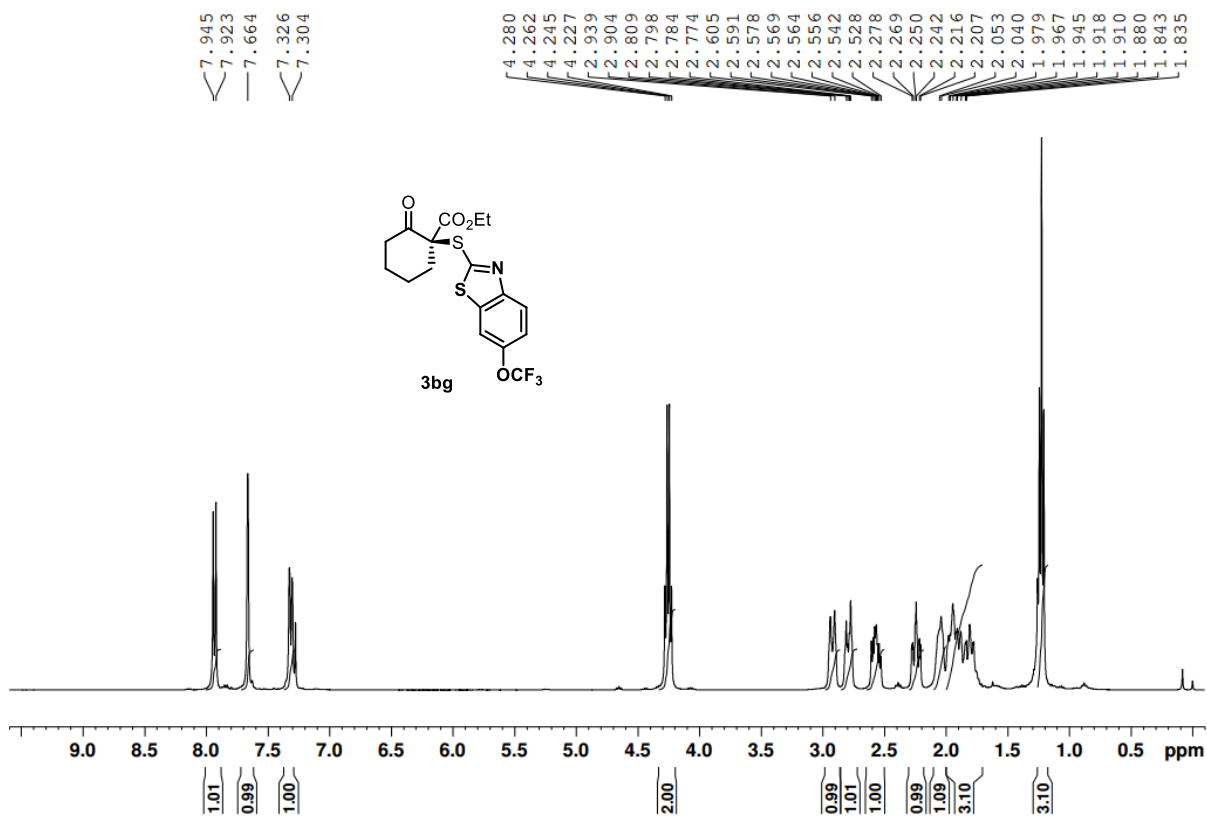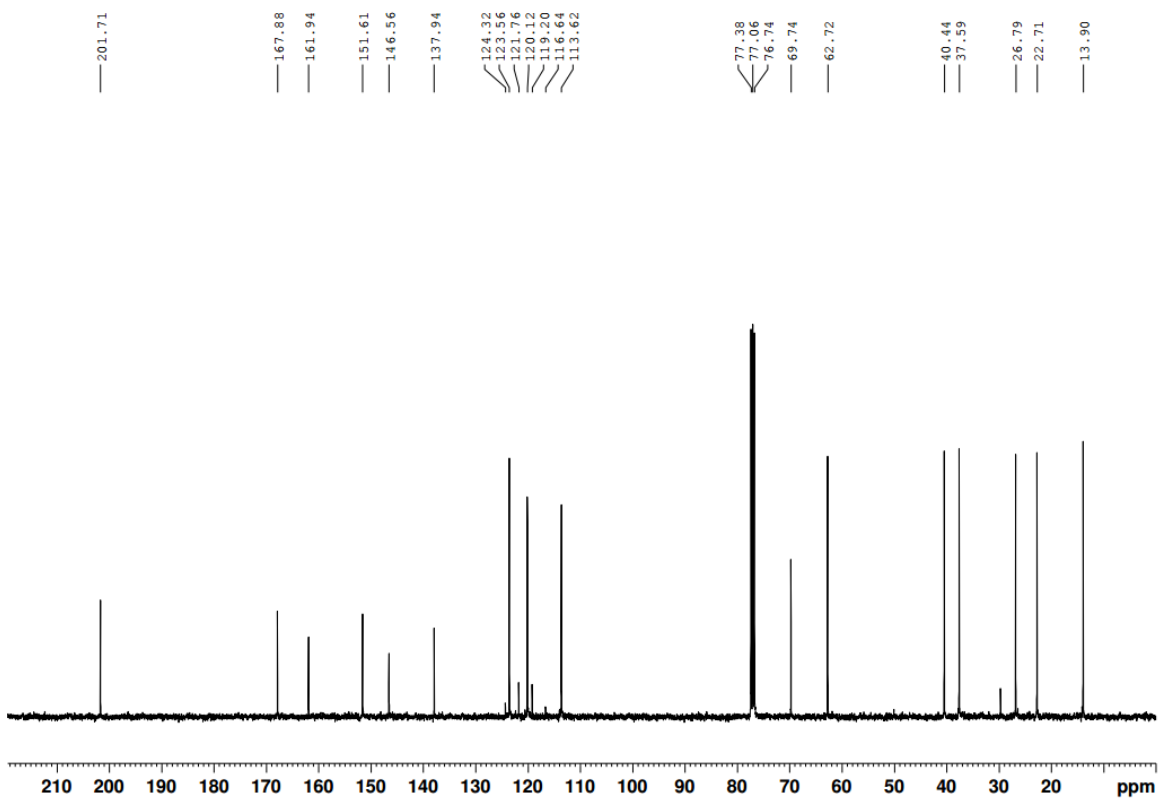

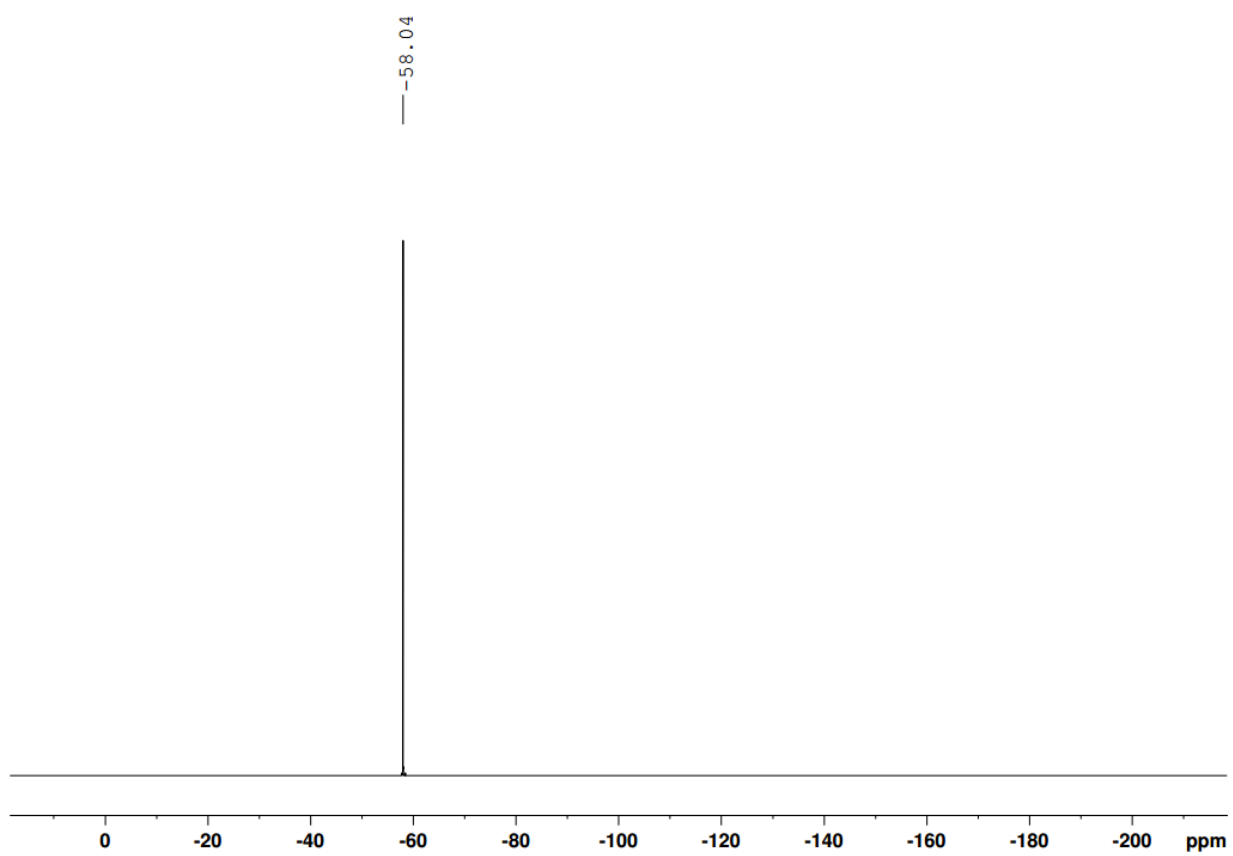

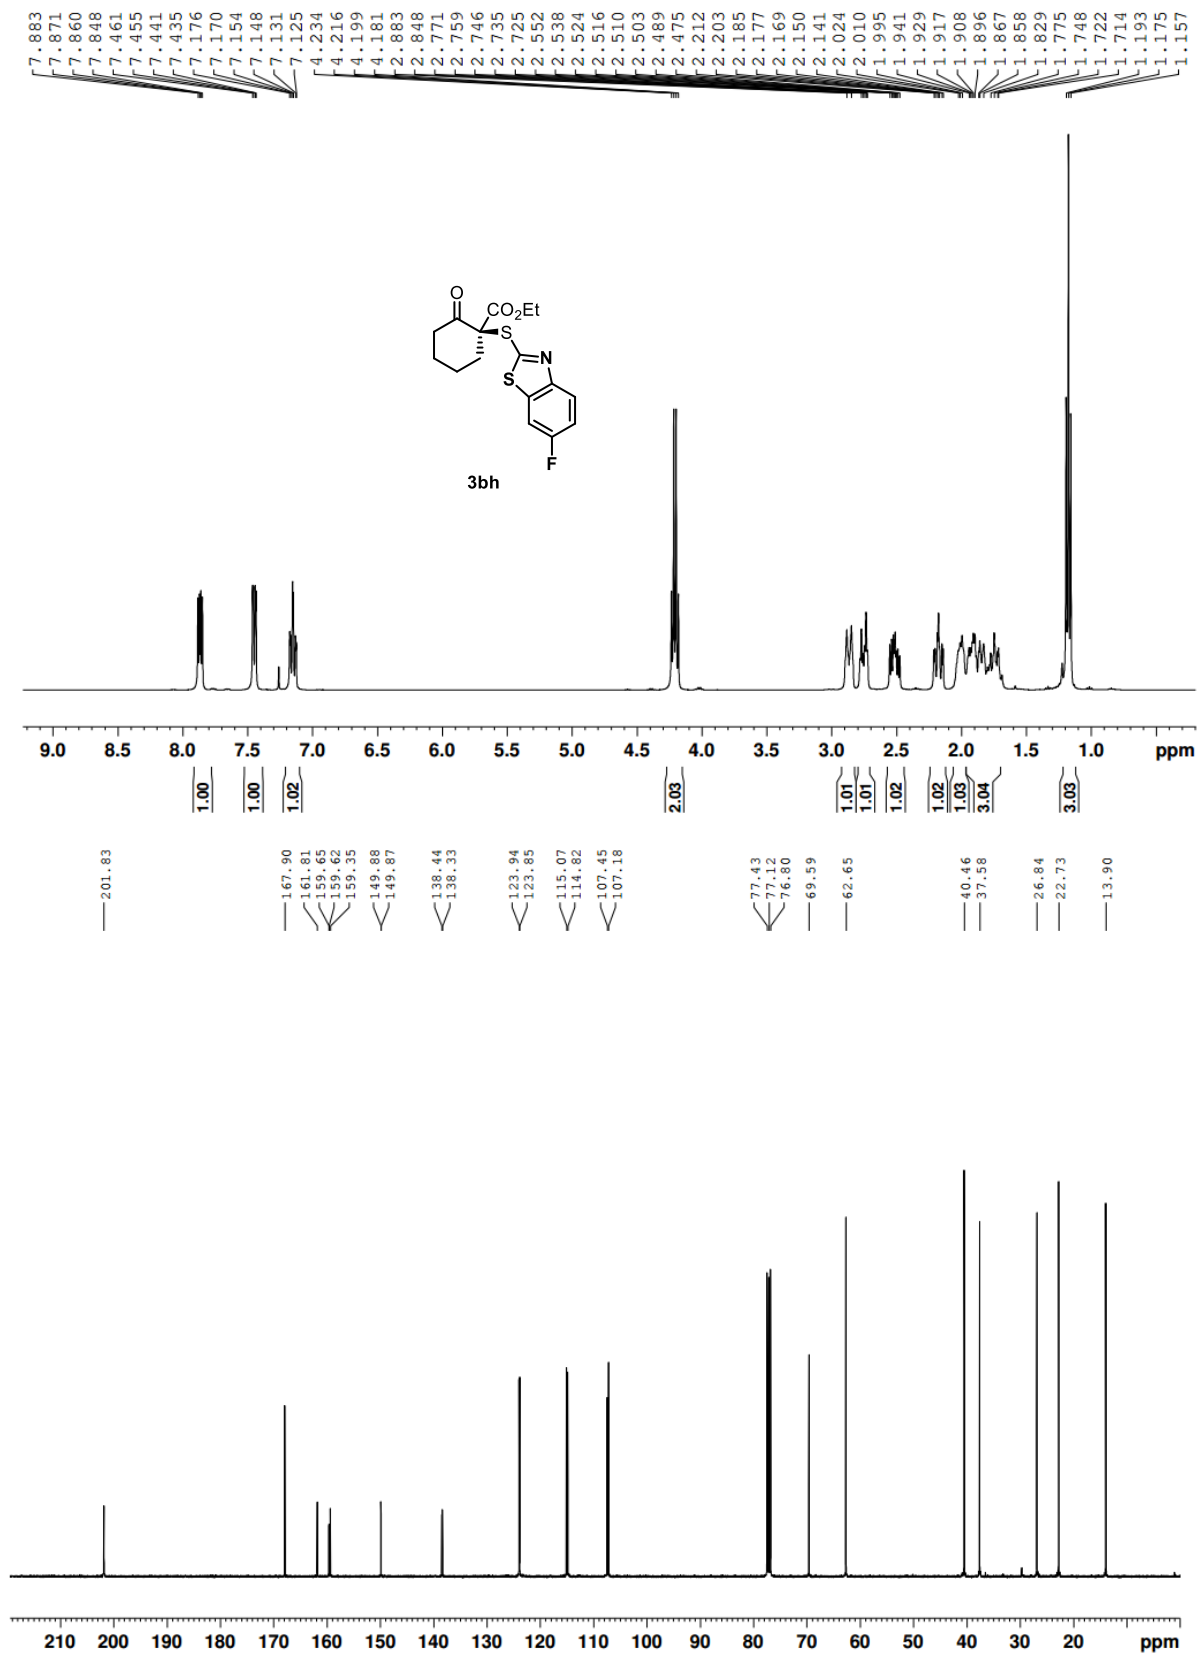



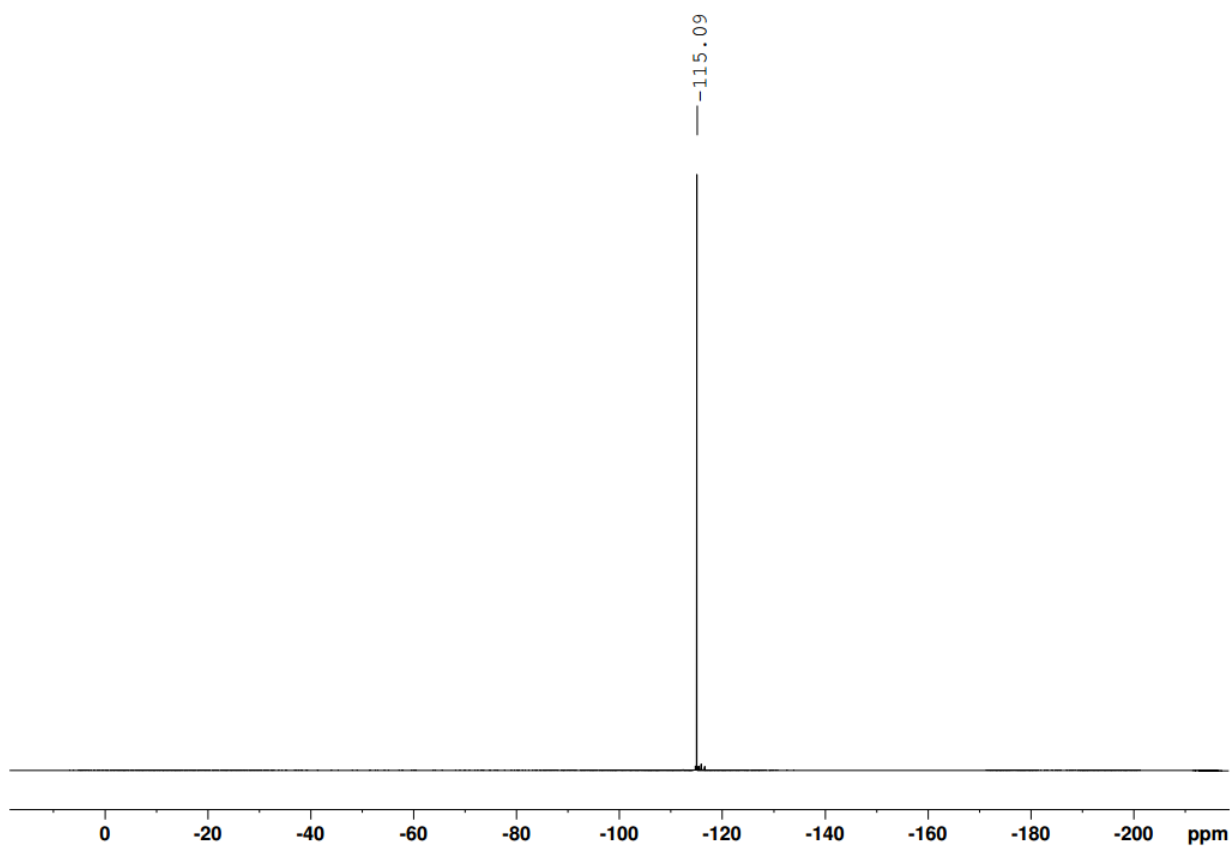

7.936  
7.932  
7.801  
7.779  
7.560  
7.555  
7.538  
7.534  
7.273  
4.256  
4.238  
4.220  
2.938  
2.925  
2.916  
2.903  
2.824  
2.814  
2.802  
2.789  
2.778  
2.607  
2.593  
2.579  
2.565  
2.557  
2.544  
2.529  
2.278  
2.269  
2.251  
2.242  
2.235  
2.216  
2.207  
2.070  
2.057  
2.043  
2.032  
1.992  
1.984  
1.971  
1.949  
1.941  
1.924  
1.913  
1.884  
1.848  
1.839  
1.820  
1.812  
1.807  
1.787  
1.779  
1.234  
1.216  
1.198

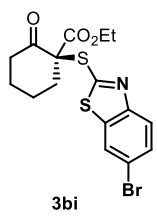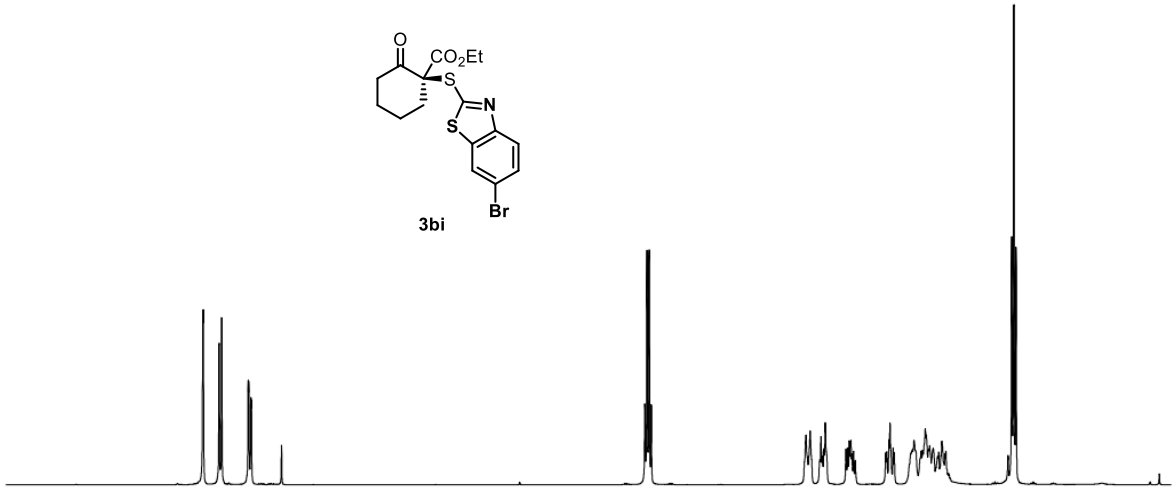

9.0 8.5 8.0 7.5 7.0 6.5 6.0 5.5 5.0 4.5 4.0 3.5 3.0 2.5 2.0 1.5 1.0 0.5 ppm

201.76  
167.88  
161.24  
152.00  
138.70  
129.72  
123.80  
123.60  
119.14  
77.39  
77.07  
76.75  
69.69  
62.70  
40.46  
37.60  
26.82  
22.73  
13.93

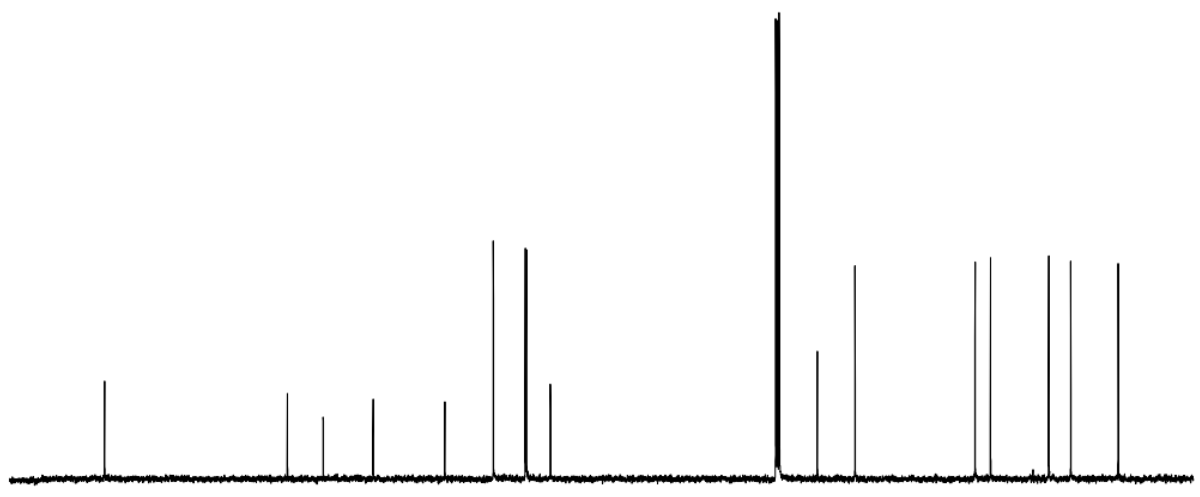

210 200 190 180 170 160 150 140 130 120 110 100 90 80 70 60 50 40 30 20 ppm

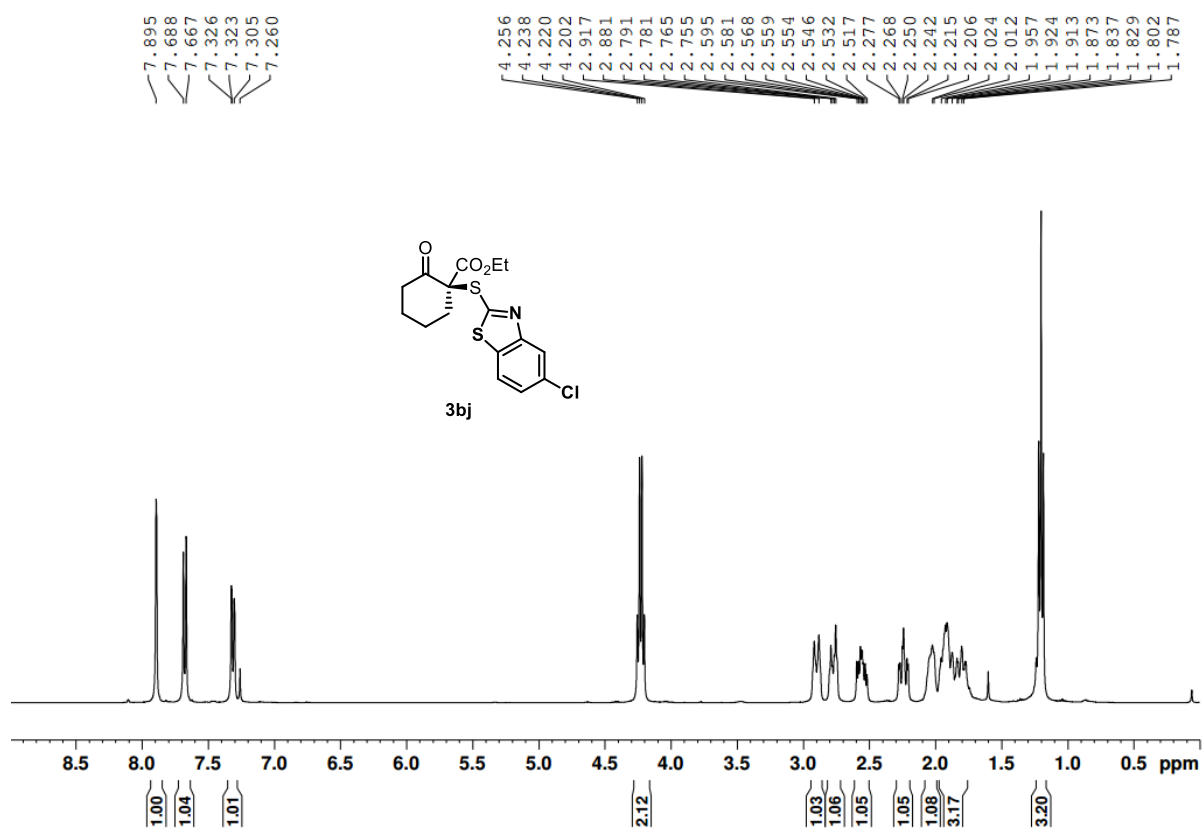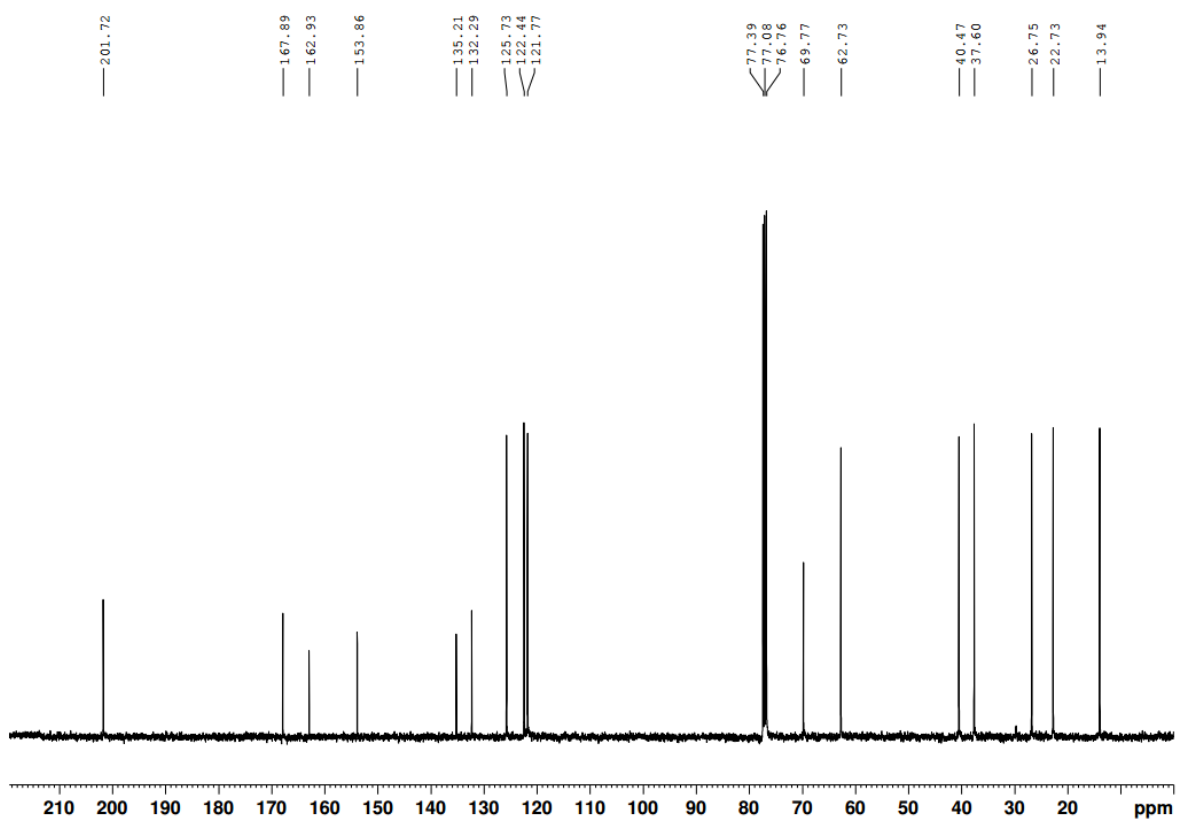

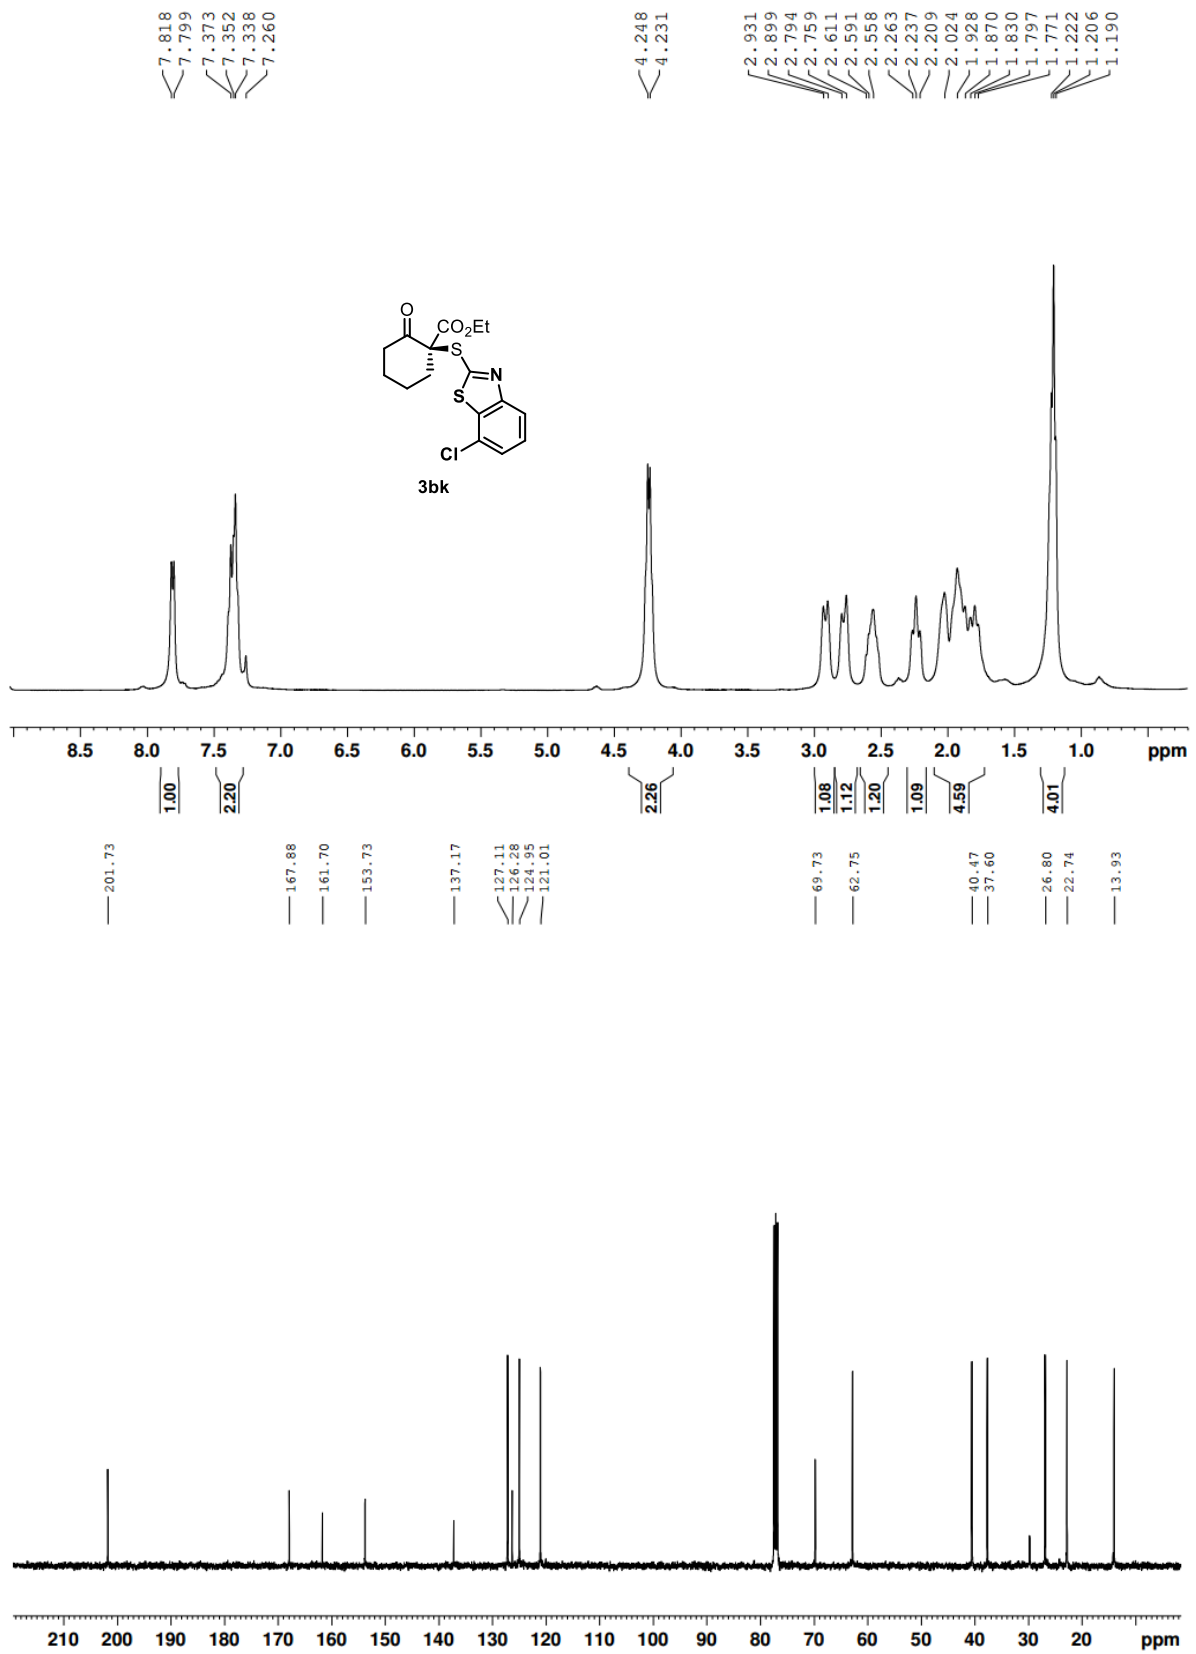

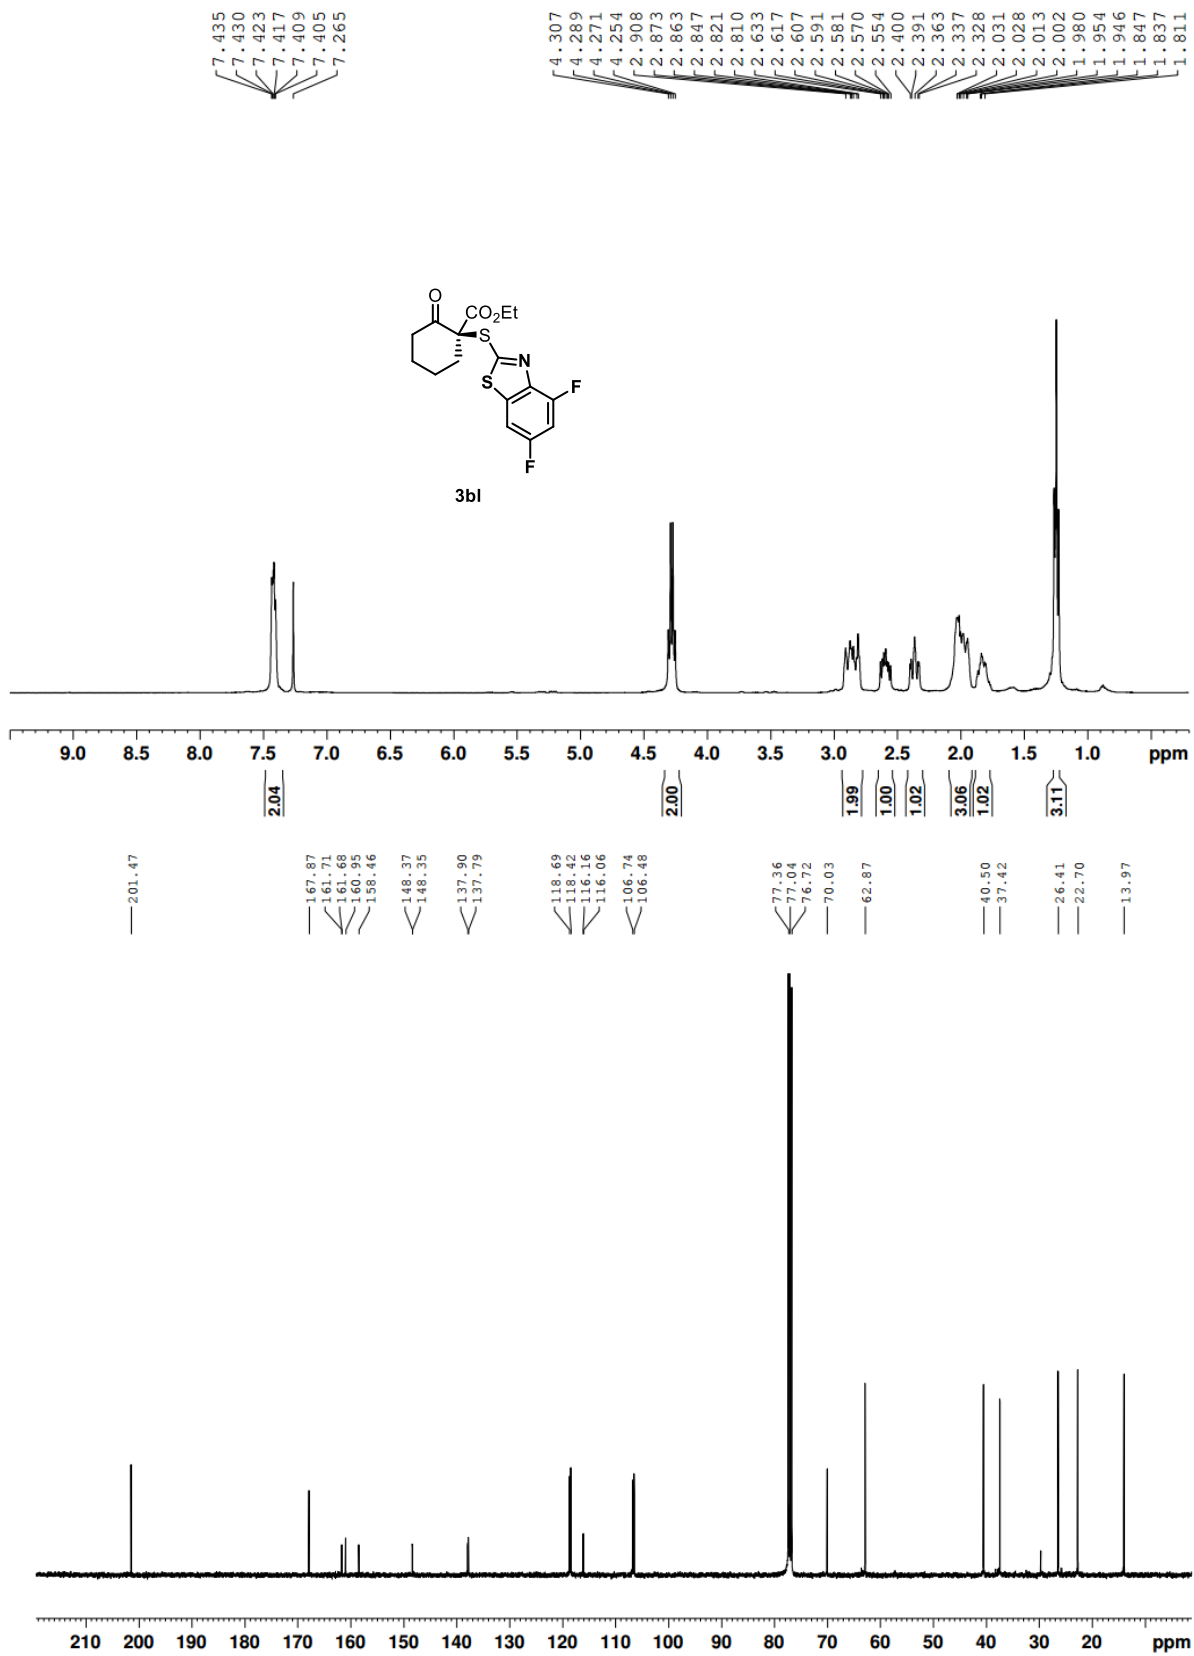

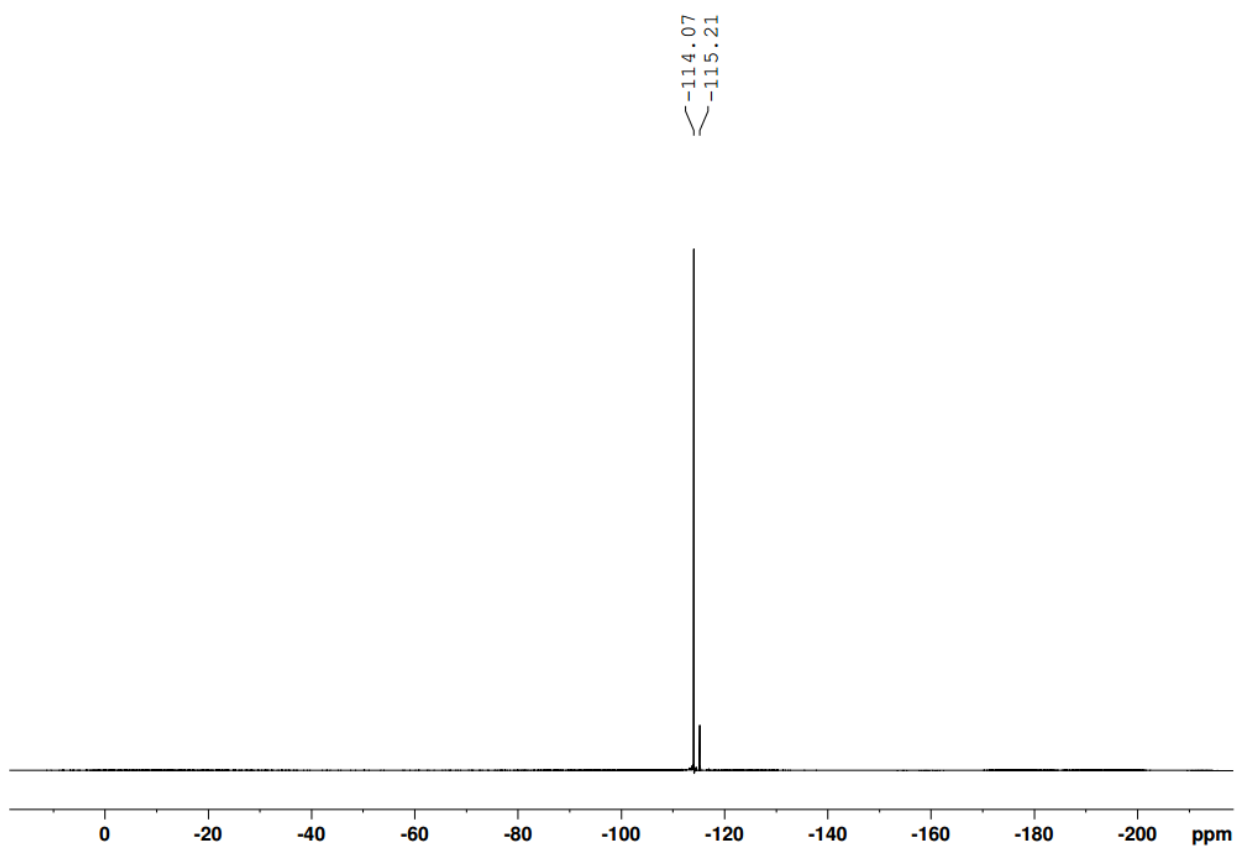

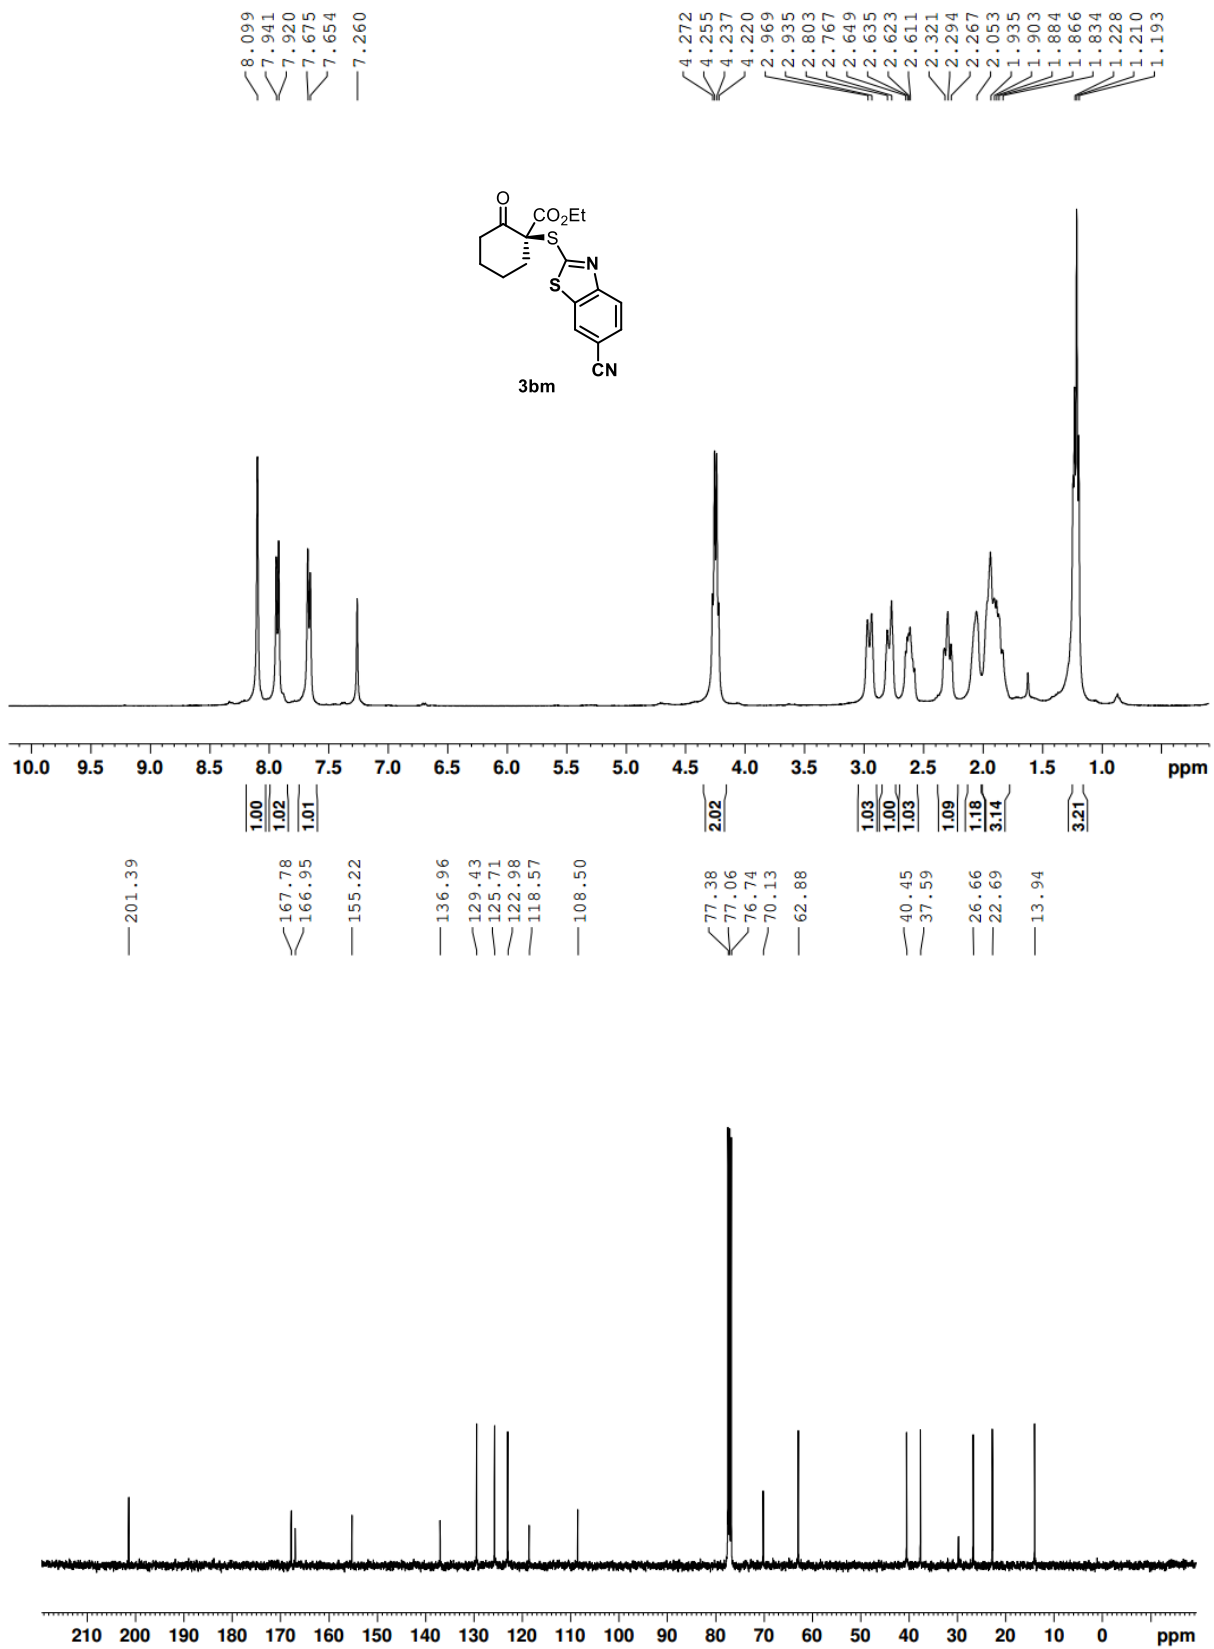

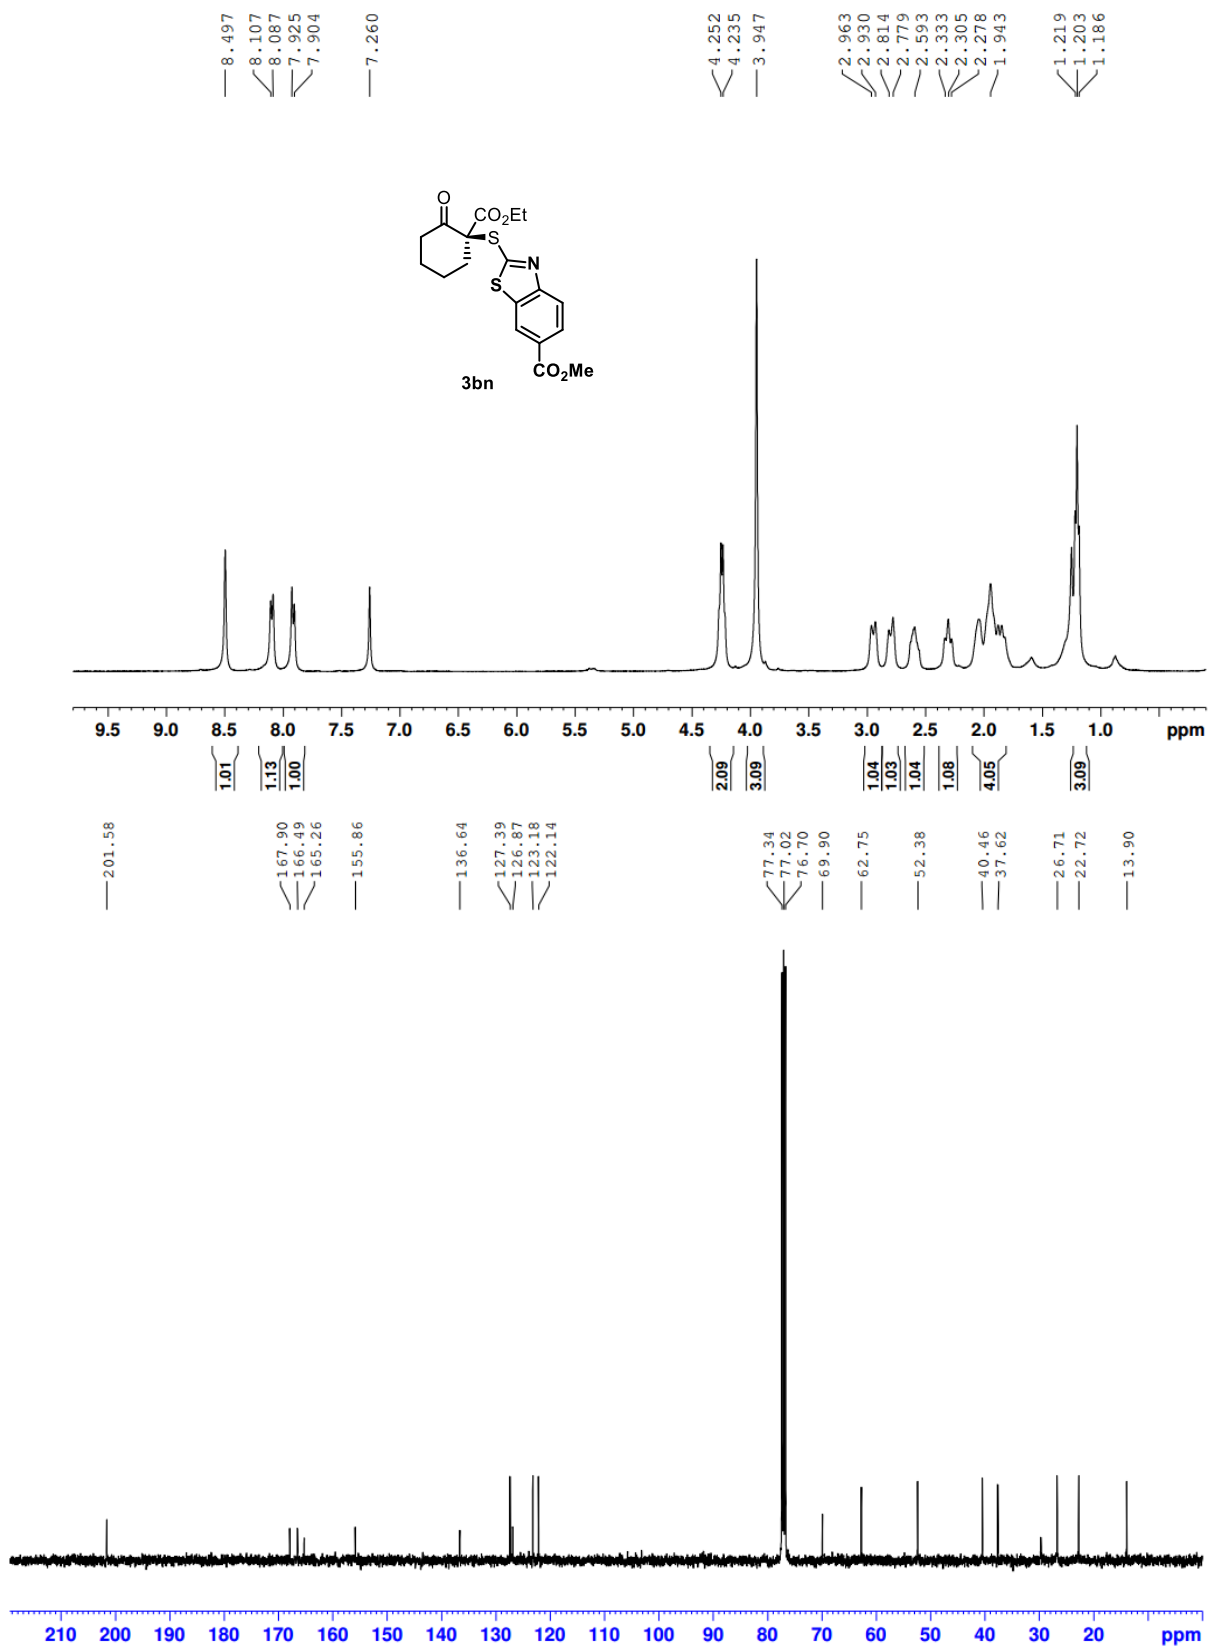



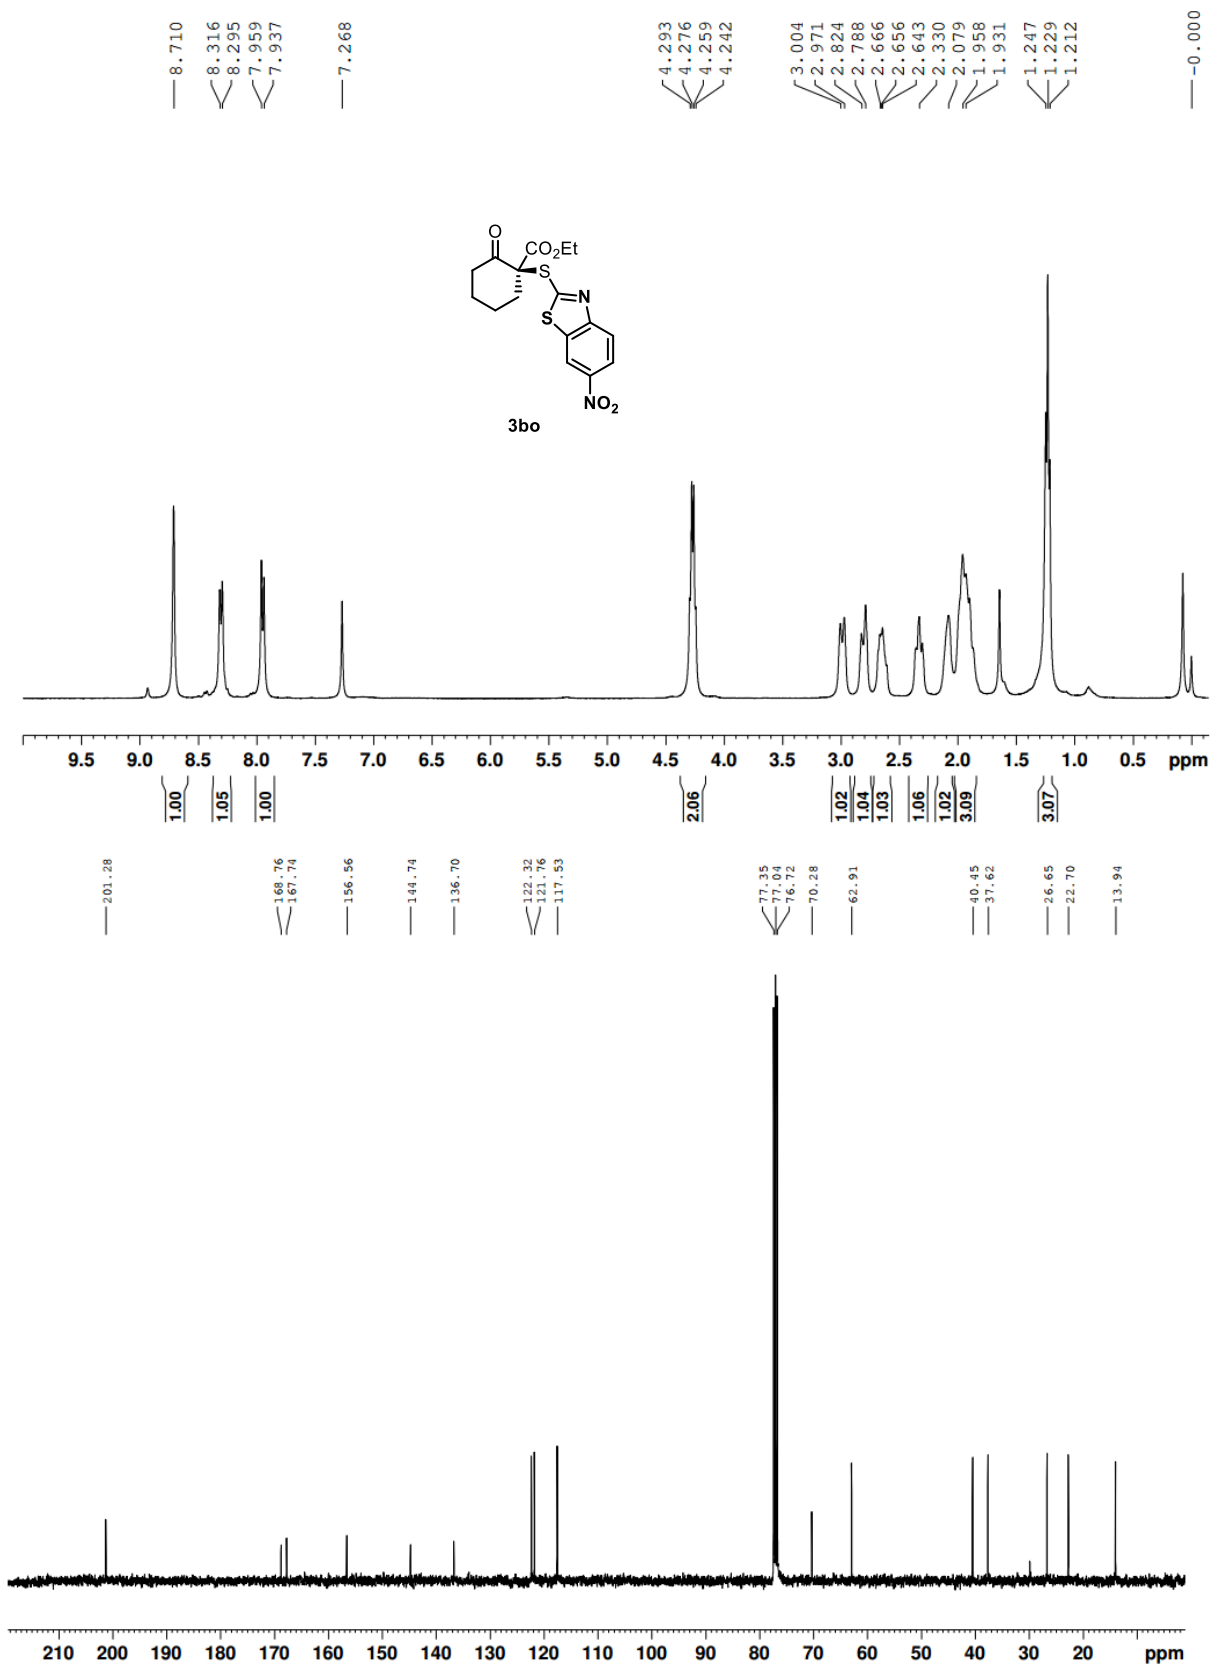

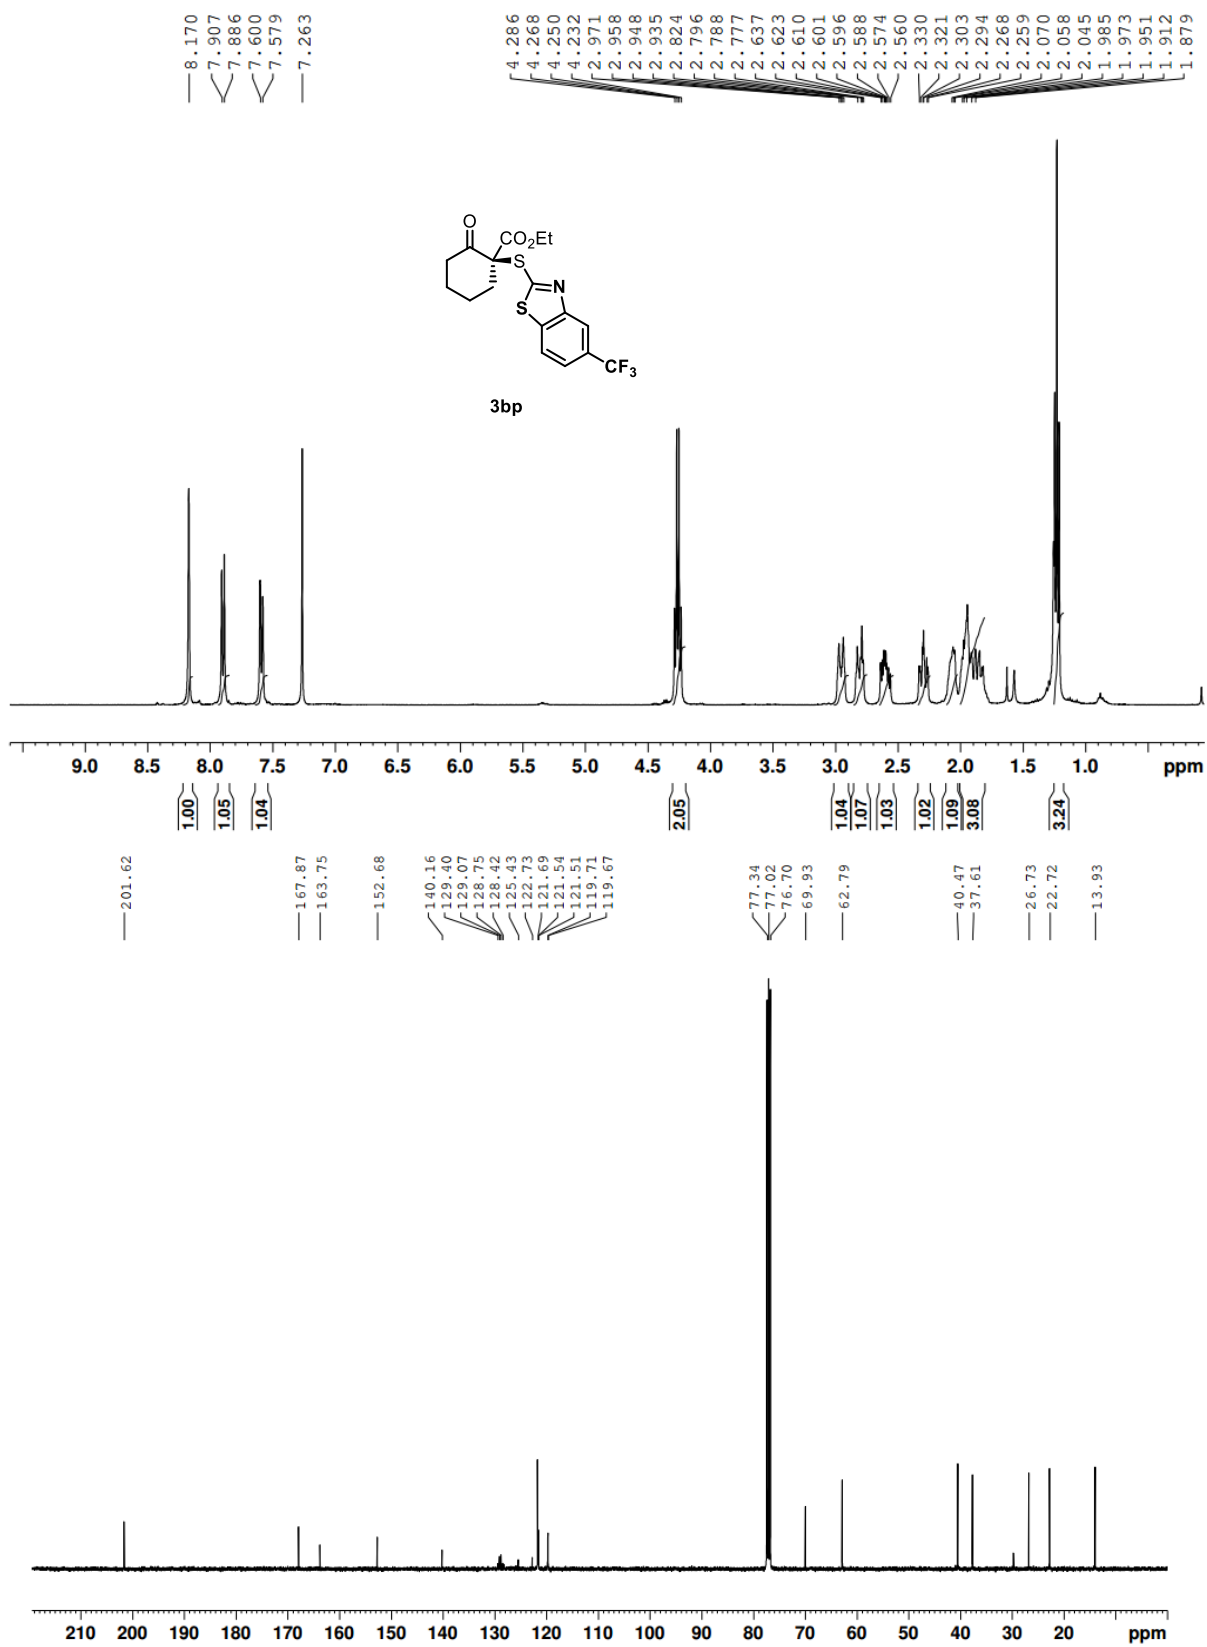

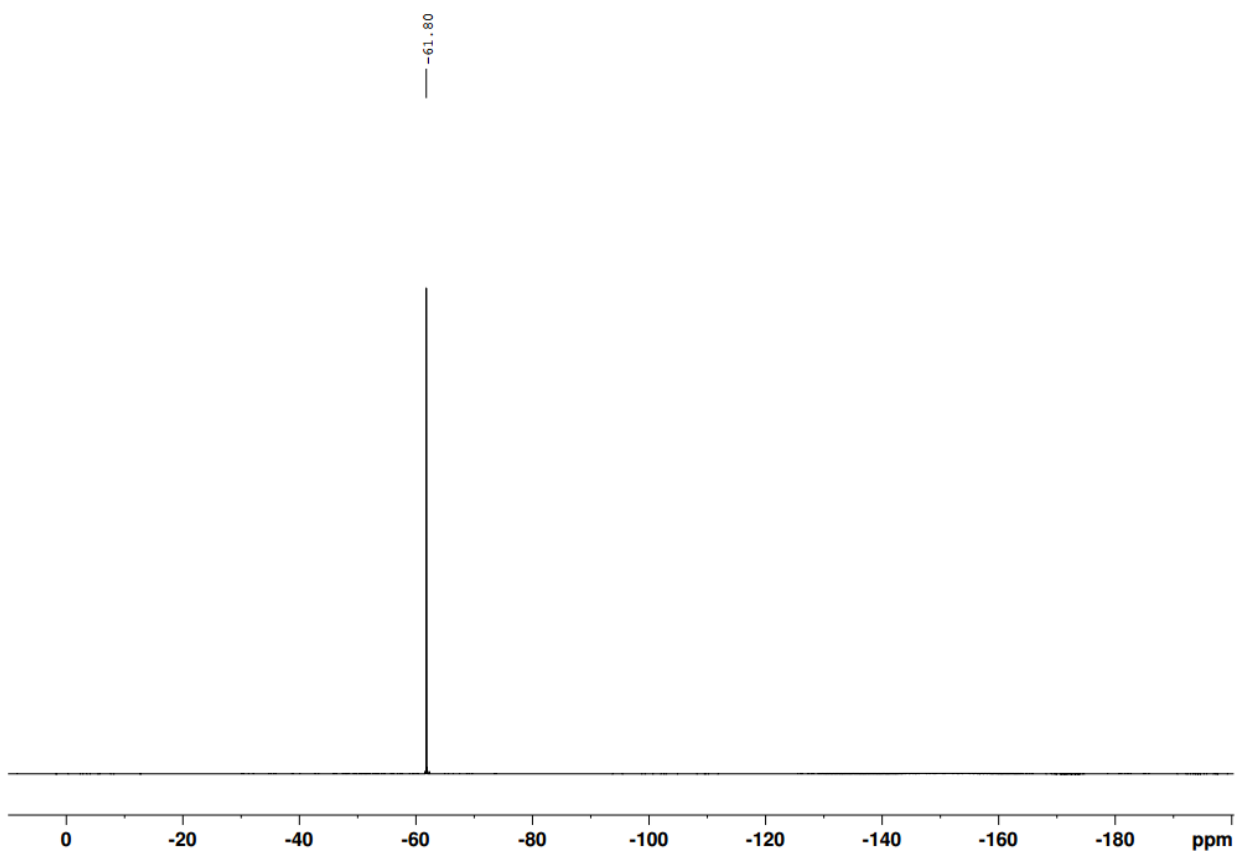

7.983  
7.963  
7.632  
7.614  
7.595  
7.493  
7.473  
7.454  
7.268  
4.261  
4.251  
4.243  
4.233  
4.225  
4.216  
4.207  
4.198  
2.881  
2.875  
2.847  
2.842  
2.731  
2.703  
2.696  
2.686  
2.469  
2.454  
2.438  
2.434  
2.423  
2.403  
2.043  
2.034  
2.026  
2.019  
2.016  
2.010  
2.005  
1.896  
1.887  
1.877  
1.848  
1.844  
1.839  
1.814  
1.805  
1.764  
1.741  
1.732  
1.660  
1.630  
1.610  
1.606  
1.601  
1.598  
1.311  
1.293  
1.275

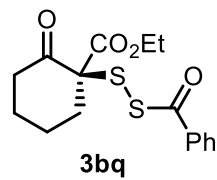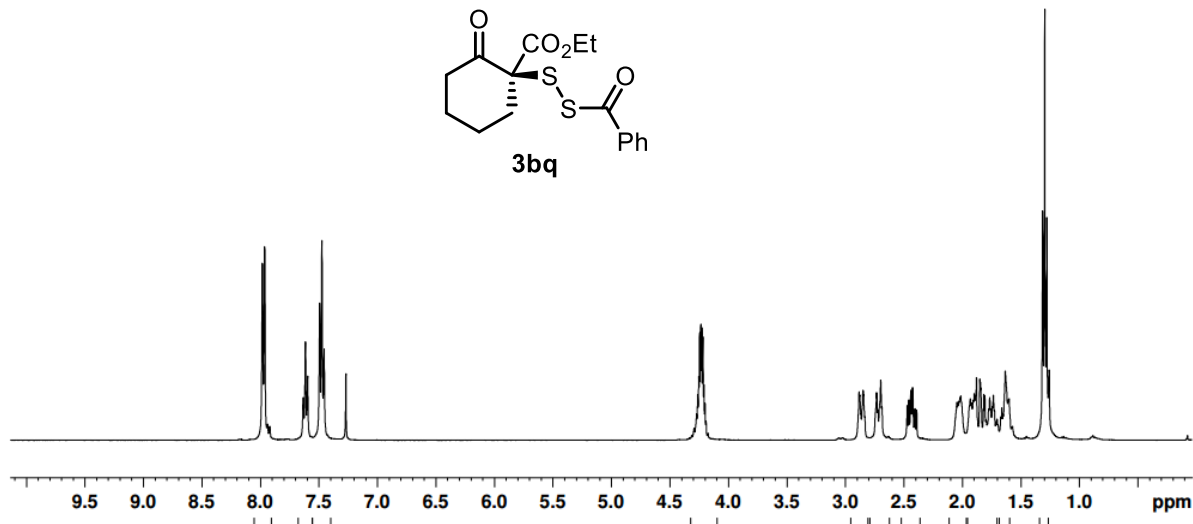

203.20  
168.81  
167.12  
135.57  
134.12  
128.88  
127.87  
77.35  
77.03  
76.72  
67.38  
62.56  
40.63  
36.28  
26.93  
22.94  
13.93

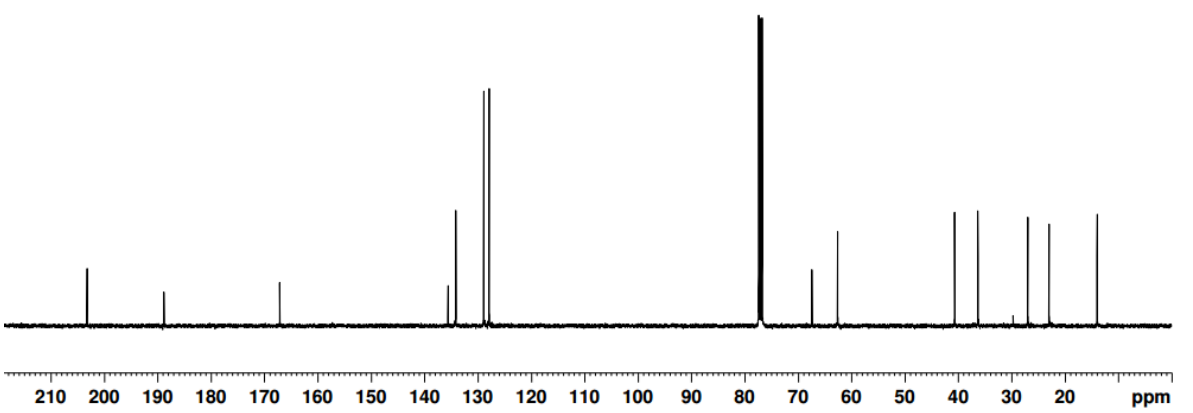

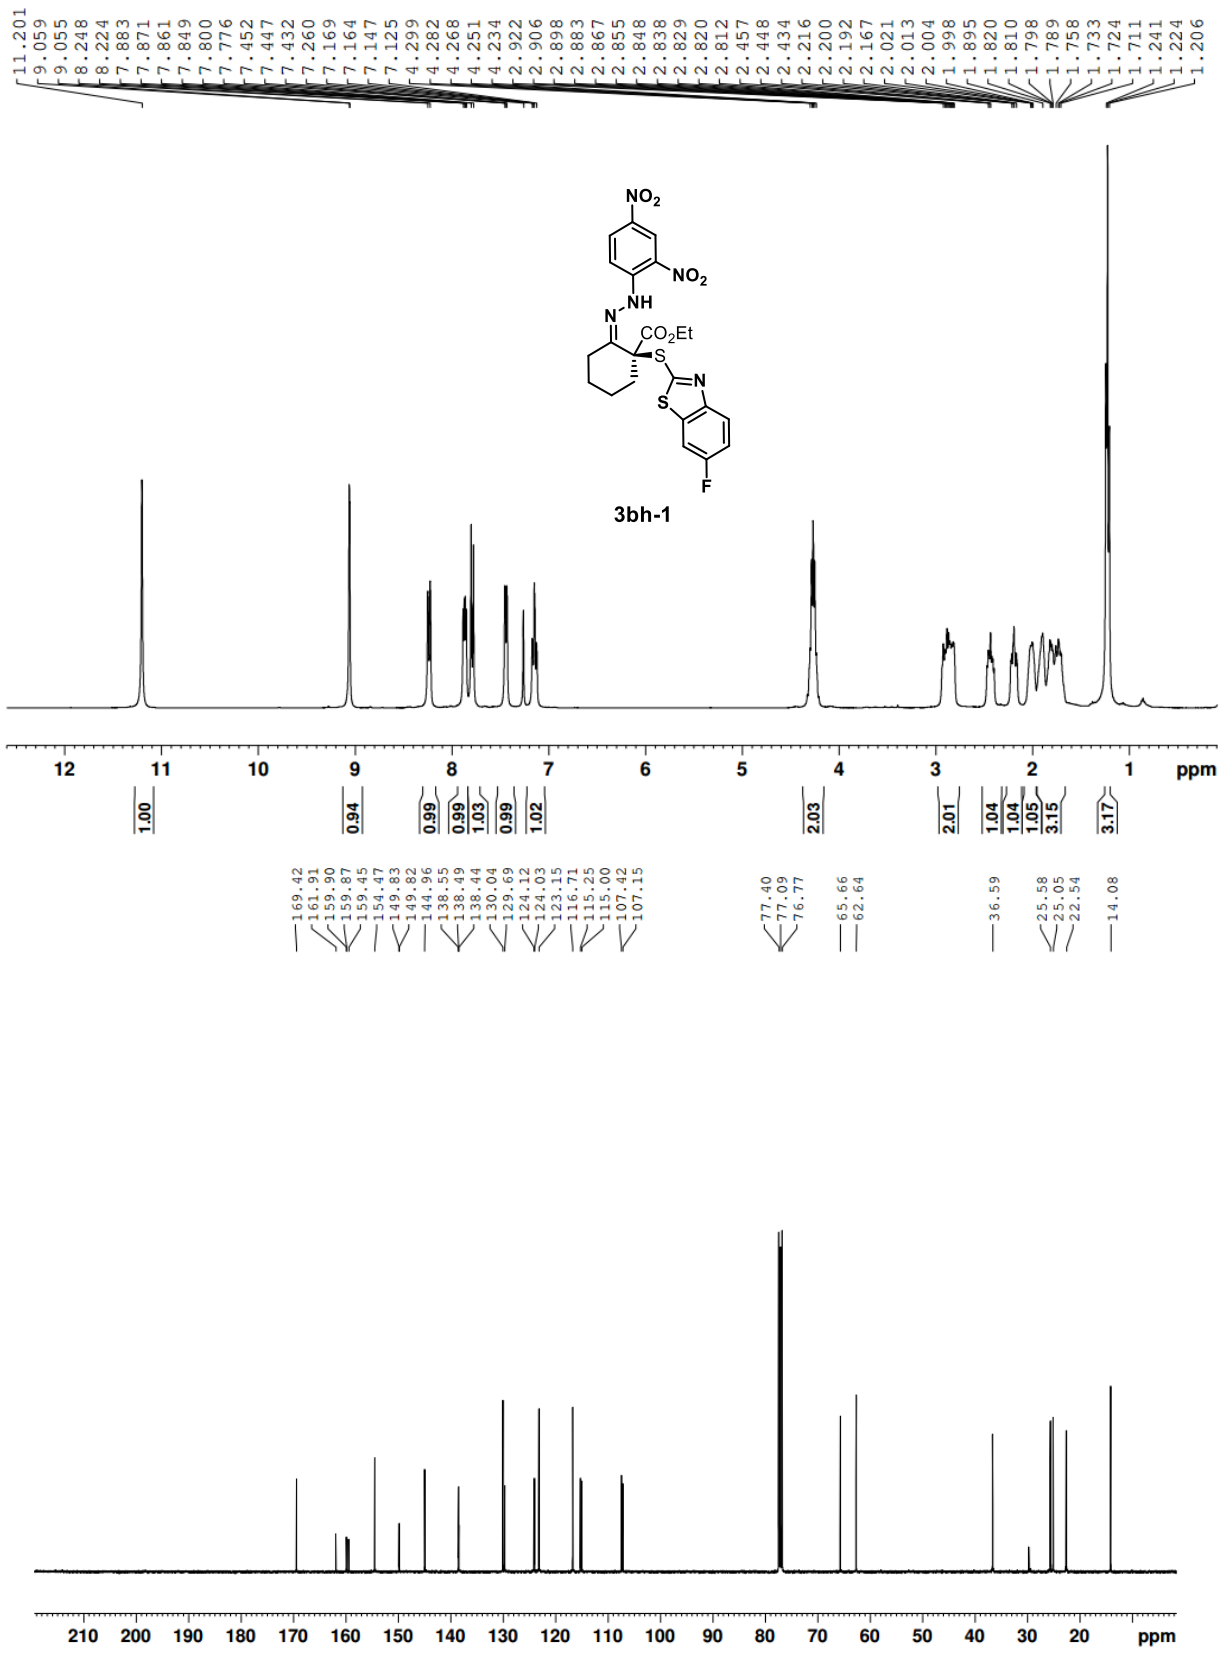

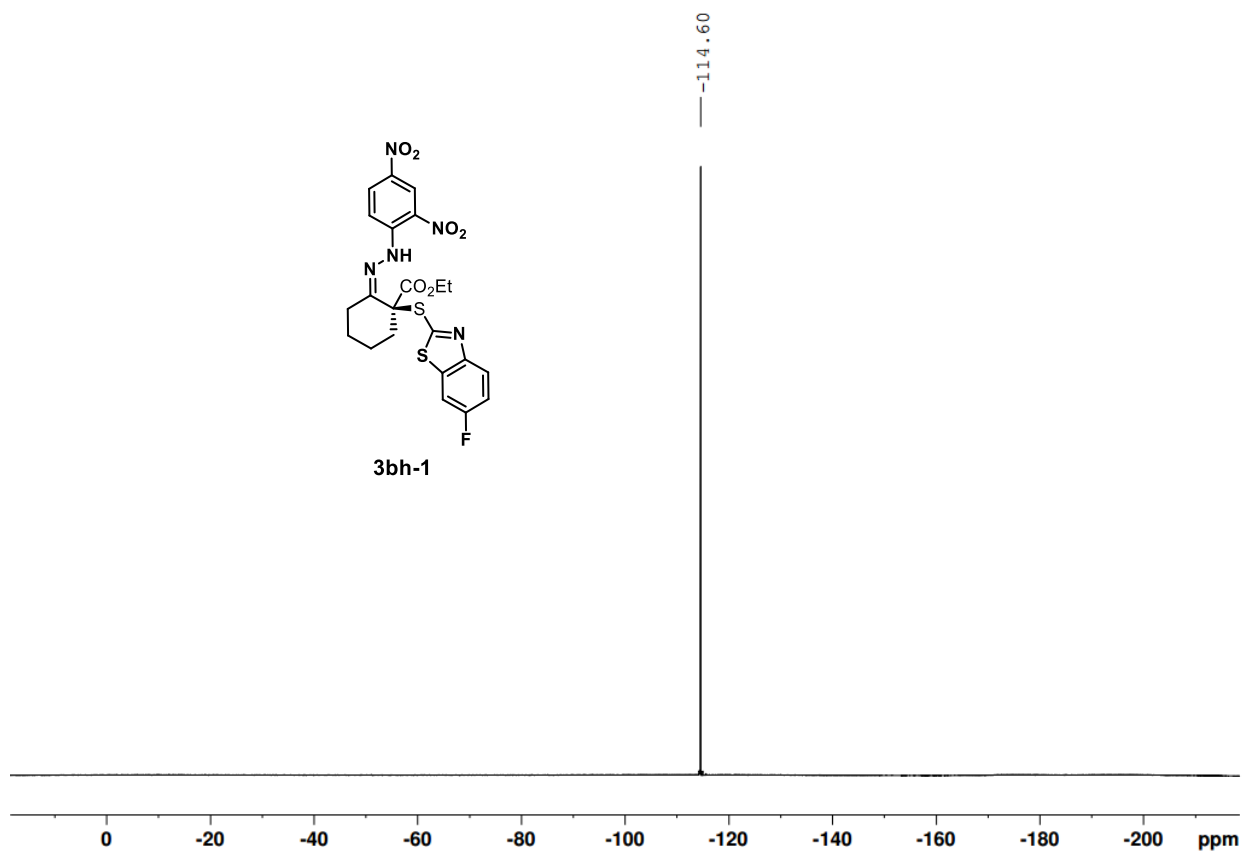

## 8. HPLC spectra

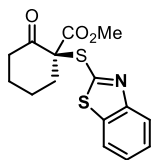

**3aa**

mAU

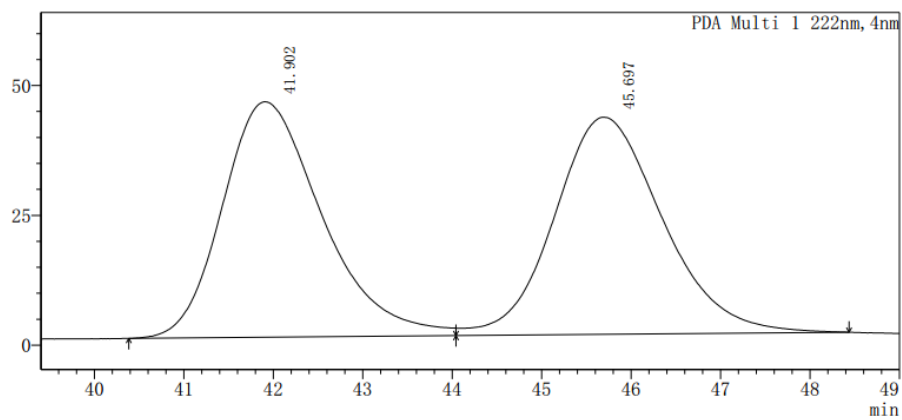

<Peak Results>

PDA Ch1 222nm

| Index | Time/min | Height/mAU | Quantity/Area | Area %/ % |
|-------|----------|------------|---------------|-----------|
| 1     | 41.902   | 45326      | 3512359       | 49.893    |
| 2     | 45.697   | 41819      | 3527375       | 50.107    |

mAU

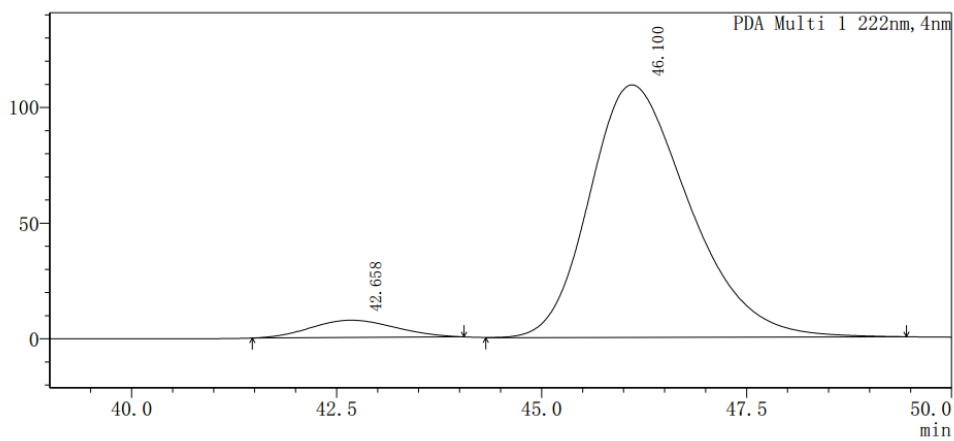

<Peak Results>

PDA Ch1 222nm

| Index | Time/min | Height/mAU | Quantity/Area | Area %/ % |
|-------|----------|------------|---------------|-----------|
| 1     | 42.658   | 7478       | 535728        | 5.463     |
| 2     | 46.100   | 109212     | 9271131       | 94.537    |

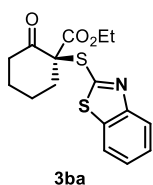

mAU

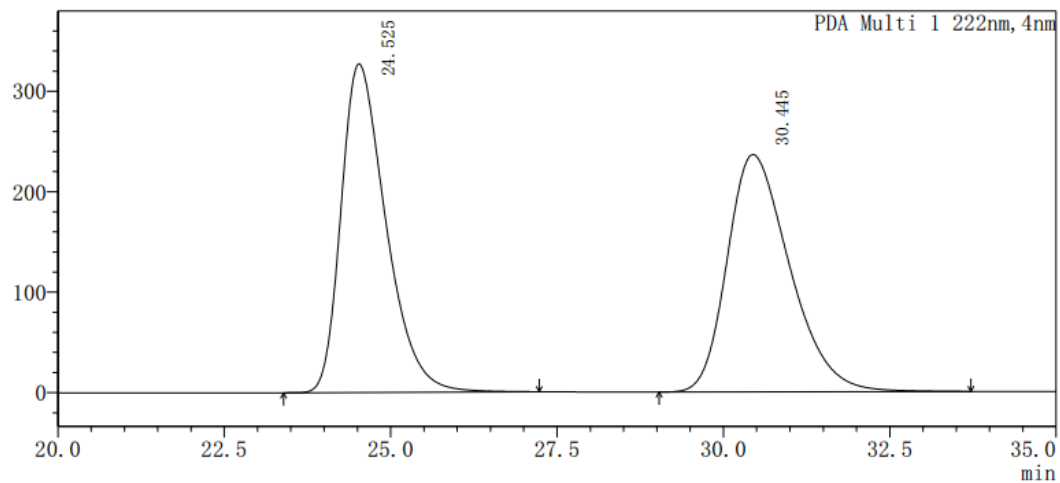

<Peak Results>

PDA Ch1 222nm

| Index | Time/min | Height/mAU | Quantity/Area | Area %/ % |
|-------|----------|------------|---------------|-----------|
| 1     | 24.525   | 327142     | 15337055      | 49.808    |
| 2     | 30.445   | 236194     | 15455349      | 50.192    |

mAU

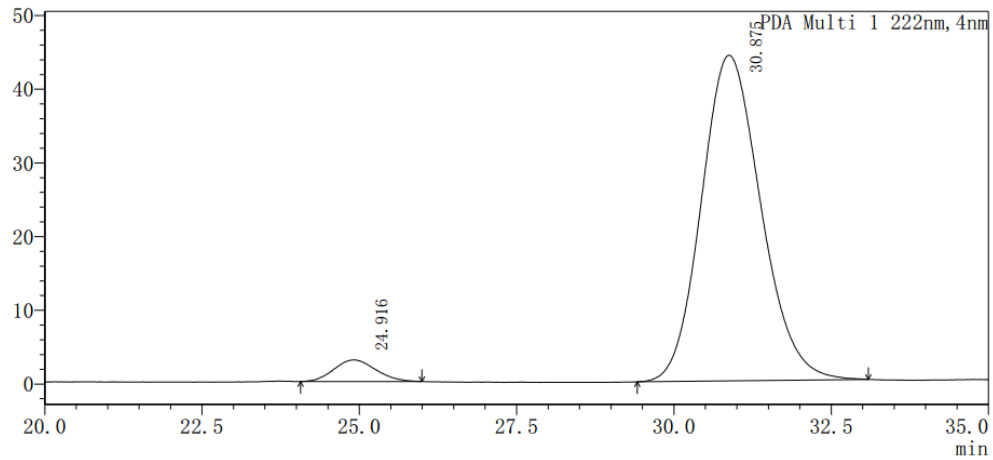

<Peak Results>

PDA Ch1 222nm

| Index | Time/min | Height/mAU | Quantity/Area | Area %/ % |
|-------|----------|------------|---------------|-----------|
| 1     | 24.916   | 2949       | 136070        | 4.473     |
| 2     | 30.875   | 44198      | 2905646       | 95.527    |



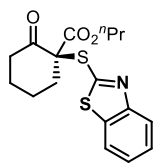

3ca

mAU

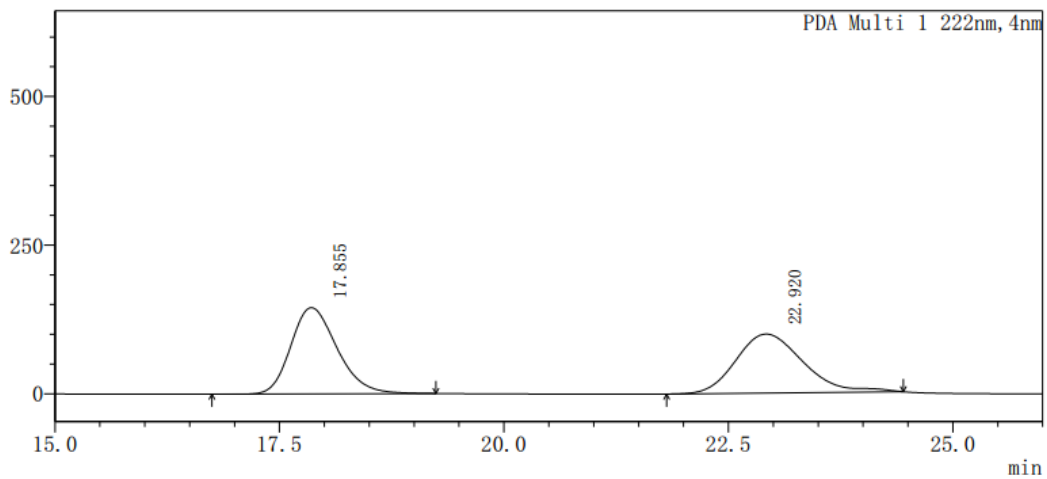

<Peak Results>

PDA Ch1 222nm

| Index | Time/min | Height/mAU | Quantity/Area | Area %/% |
|-------|----------|------------|---------------|----------|
| 1     | 17.855   | 145092     | 5197620       | 50.163   |
| 2     | 22.920   | 99266      | 5163857       | 49.837   |

mAU

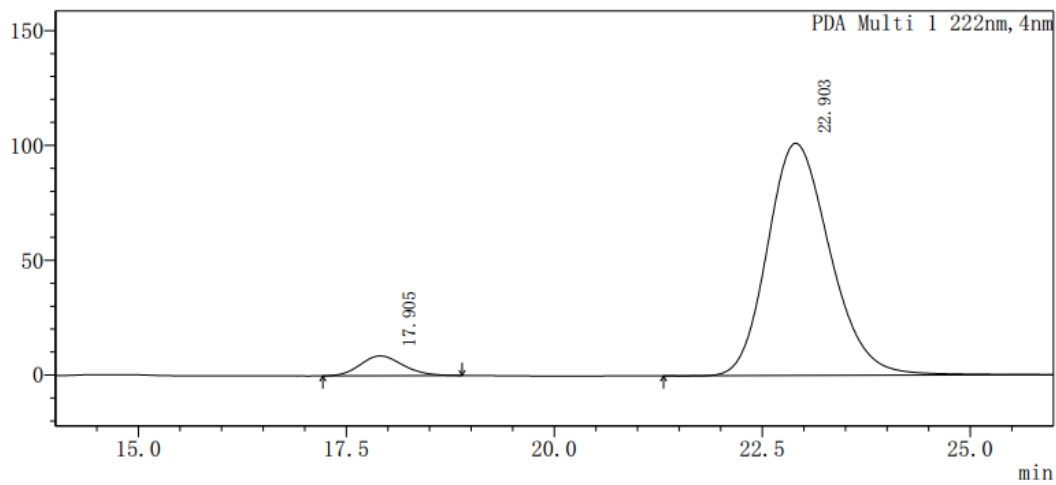

<Peak Results>

PDA Ch1 222nm

| Index | Time/min | Height/mAU | Quantity/Area | Area %/% |
|-------|----------|------------|---------------|----------|
| 1     | 17.905   | 8597       | 306266        | 5.452    |
| 2     | 22.903   | 101164     | 5311576       | 94.548   |

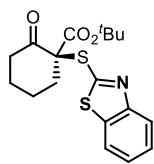

3da

mAU

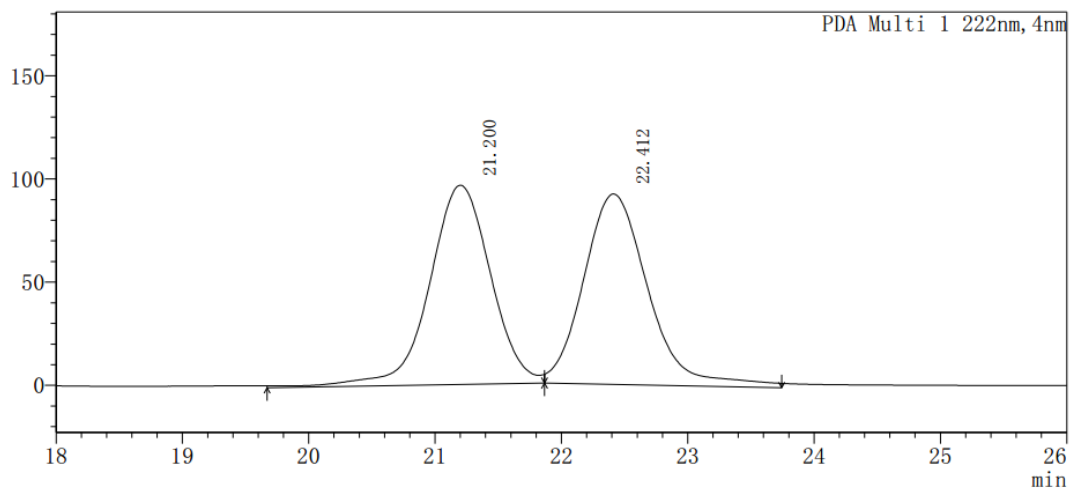

<Peak Results>

PDA Ch1 222nm

| Index | Time/min | Height/mAU | Quantity/Area | Area %/ % |
|-------|----------|------------|---------------|-----------|
| 1     | 21.200   | 96588      | 3260085       | 49.913    |
| 2     | 22.412   | 92279      | 3271477       | 50.087    |

mAU

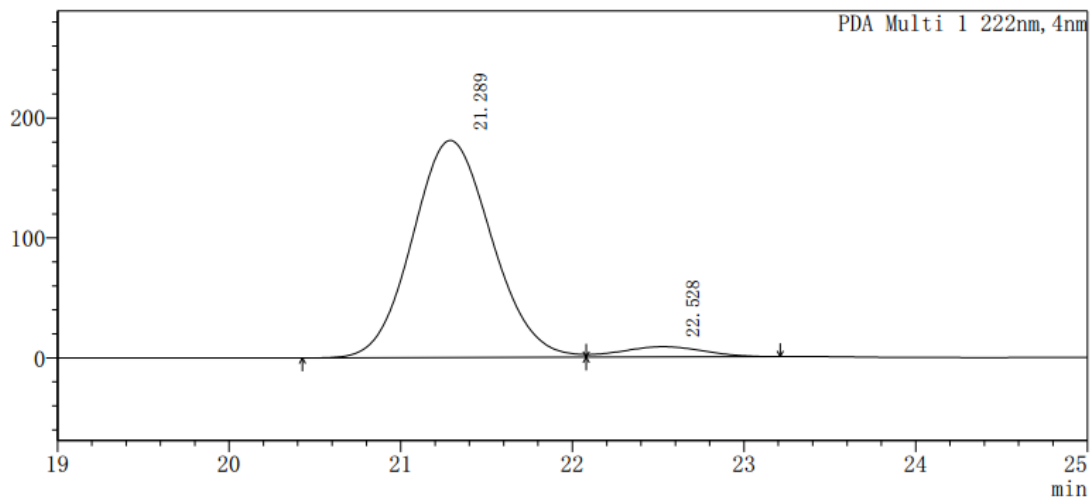

<Peak Results>

PDA Ch1 222nm

| Index | Time/min | Height/mAU | Quantity/Area | Area %/ % |
|-------|----------|------------|---------------|-----------|
| 1     | 21.289   | 181023     | 5820697       | 95.353    |
| 2     | 22.528   | 8565       | 283687        | 4.647     |

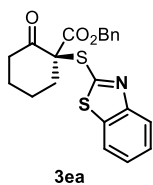

mAU

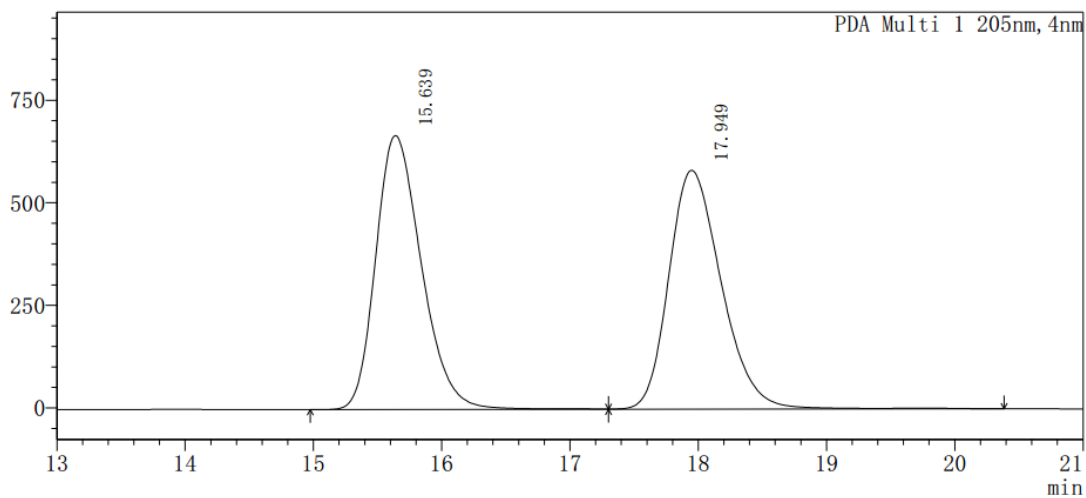

<Peak Results>

PDA Ch1 205nm

| Index | Time/min | Height/mAU | Quantity/Area | Area %/% |
|-------|----------|------------|---------------|----------|
| 1     | 15.639   | 667930     | 16576846      | 49.972   |
| 2     | 17.949   | 582048     | 16595247      | 50.028   |

mAU

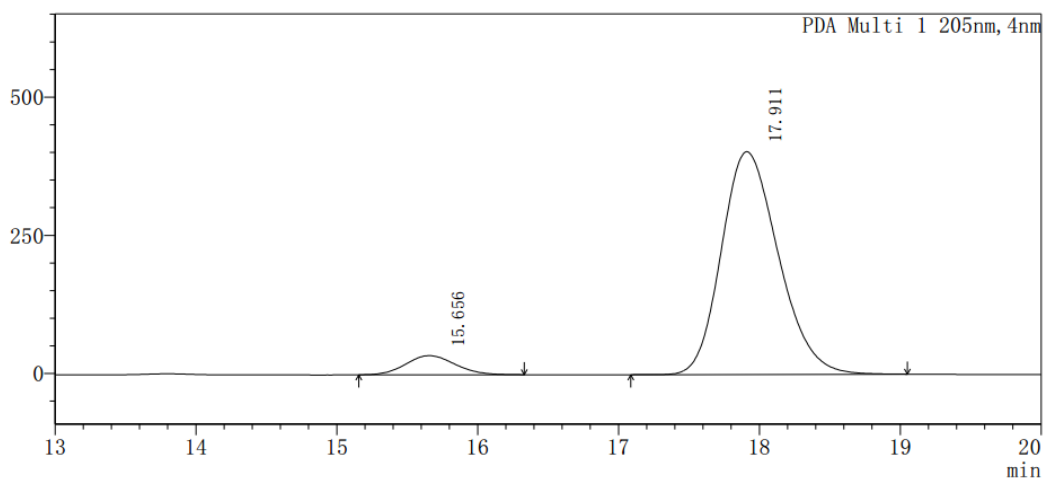

<Peak Results>

PDA Ch1 205nm

| Index | Time/min | Height/mAU | Quantity/Area | Area %/% |
|-------|----------|------------|---------------|----------|
| 1     | 15.656   | 34597      | 842896        | 6.917    |
| 2     | 17.911   | 403031     | 11343153      | 93.083   |

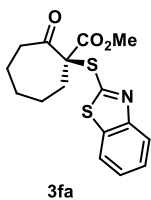

mAU

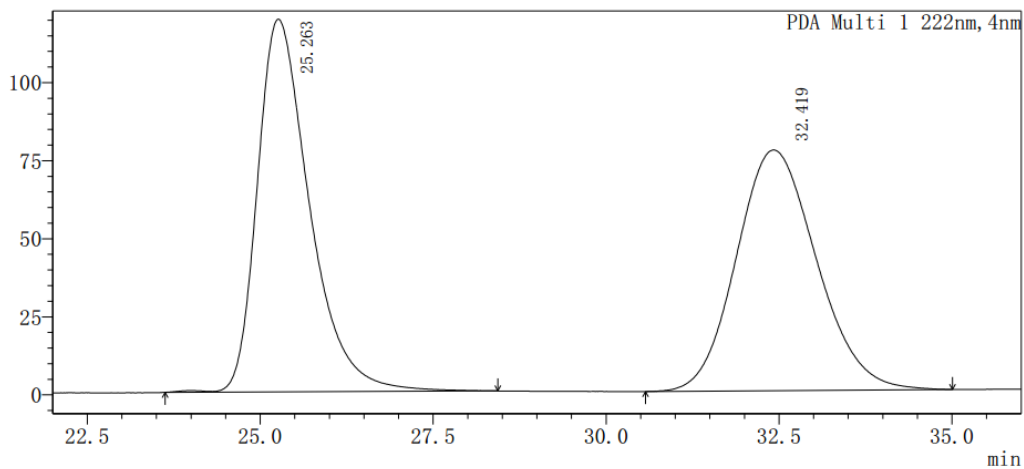

<Peak Results>

PDA Ch1 222nm

| Index | Time/min | Height/mAU | Quantity/Area | Area %/% |
|-------|----------|------------|---------------|----------|
| 1     | 25.263   | 119372     | 6264426       | 50.199   |
| 2     | 32.419   | 77102      | 6214781       | 49.801   |

mAU

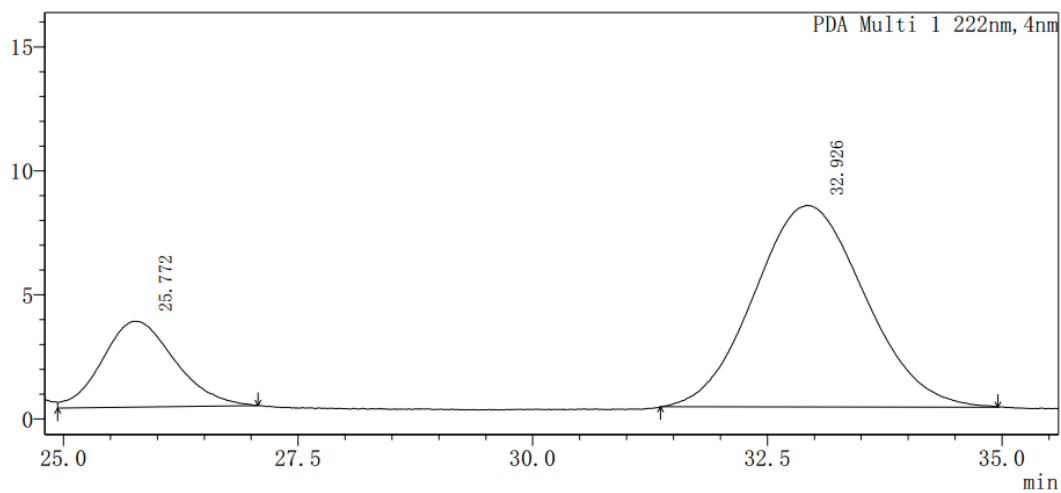

<Peak Results>

PDA Ch1 222nm

| Index | Time/min | Height/mAU | Quantity/Area | Area %/% |
|-------|----------|------------|---------------|----------|
| 1     | 25.772   | 3458       | 186047        | 21.798   |
| 2     | 32.926   | 8130       | 667451        | 78.202   |

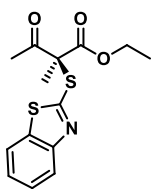

3ga

mAU

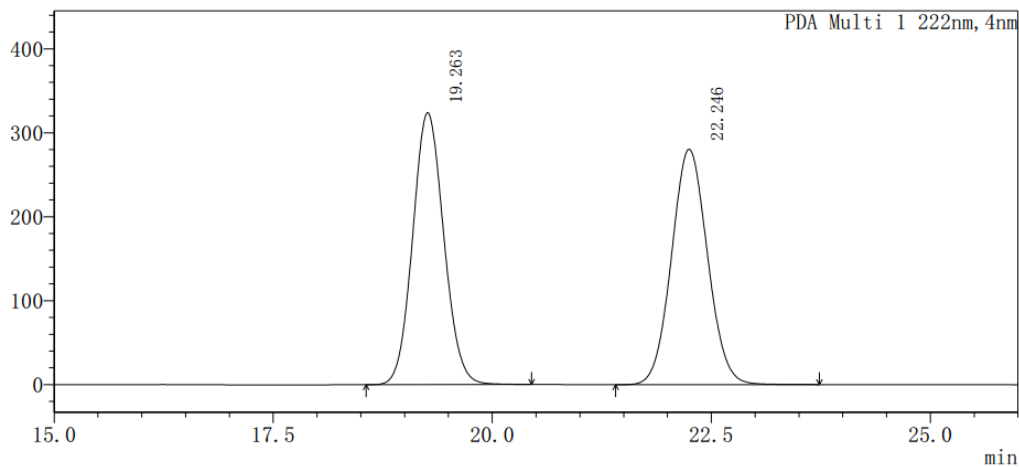

<Peak Results>

PDA Ch1 222nm

| Index | Time/min | Height/mAU | Quantity/Area | Area %/% |
|-------|----------|------------|---------------|----------|
| 1     | 19.263   | 324067     | 8007448       | 49.954   |
| 2     | 22.246   | 280421     | 8022132       | 50.046   |

mAU

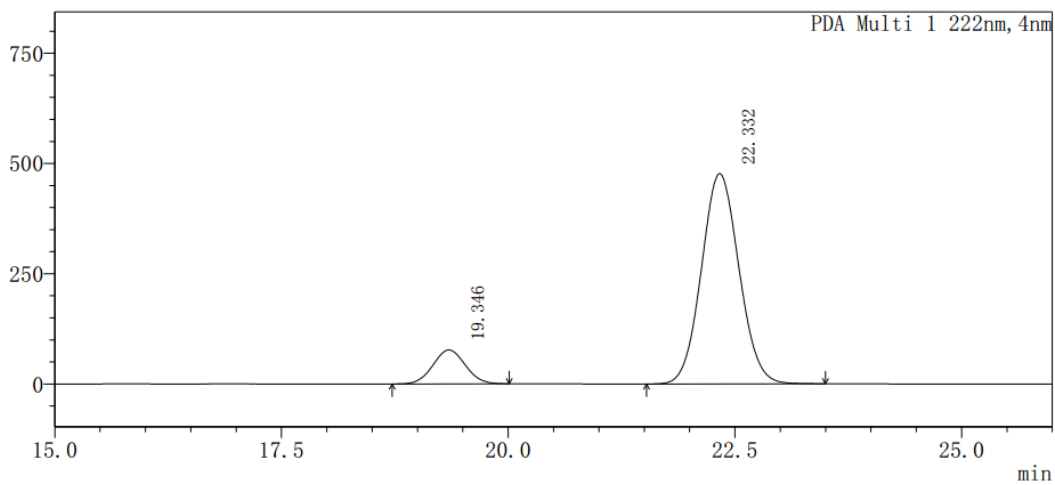

<Peak Results>

PDA Ch1 222nm

| Index | Time/min | Height/mAU | Quantity/Area | Area %/% |
|-------|----------|------------|---------------|----------|
| 1     | 19.346   | 76975      | 1917186       | 12.236   |
| 2     | 22.332   | 476831     | 13751831      | 87.764   |

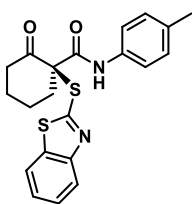

3ha

mAU

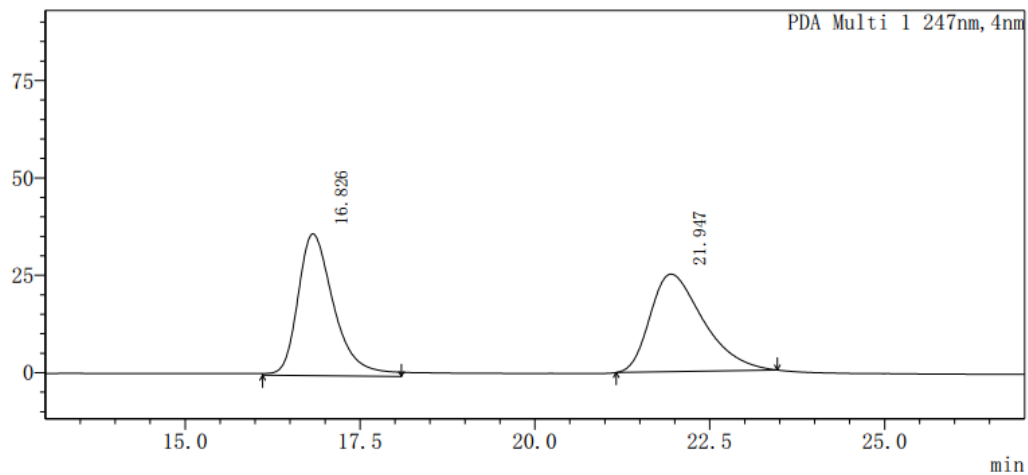

<Peak Results>

PDA Ch1 247nm

| Index | Time/min | Height/mAU | Quantity/Area | Area %/% |
|-------|----------|------------|---------------|----------|
| 1     | 16.826   | 36411      | 1314109       | 49.754   |
| 2     | 21.947   | 25052      | 1327105       | 50.246   |

mAU

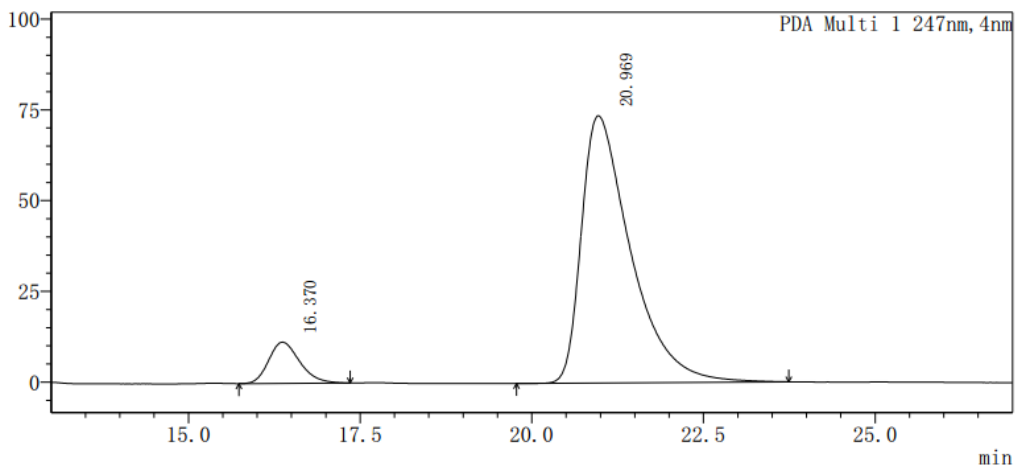

<Peak Results>

PDA Ch1 247nm

| Index | Time/min | Height/mAU | Quantity/Area | Area %/% |
|-------|----------|------------|---------------|----------|
| 1     | 16.370   | 11358      | 357252        | 8.865    |
| 2     | 20.969   | 73608      | 3672454       | 91.135   |

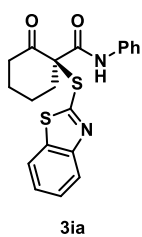

mAU

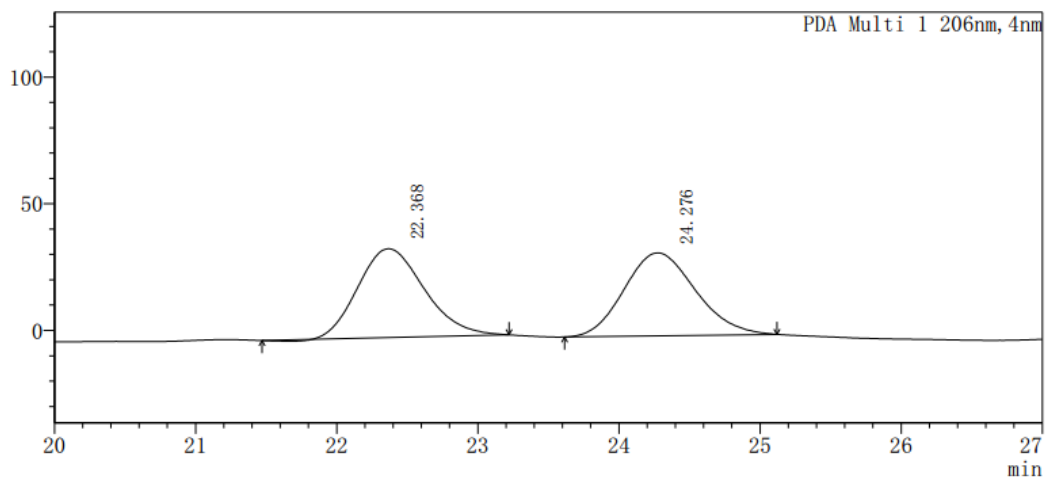

<Peak Results>

PDA Ch1 206nm

| Index | Time/min | Height/mAU | Quantity/Area | Area %/% |
|-------|----------|------------|---------------|----------|
| 1     | 22.368   | 35111      | 1147582       | 49.923   |
| 2     | 24.276   | 32747      | 1151136       | 50.077   |

mAU

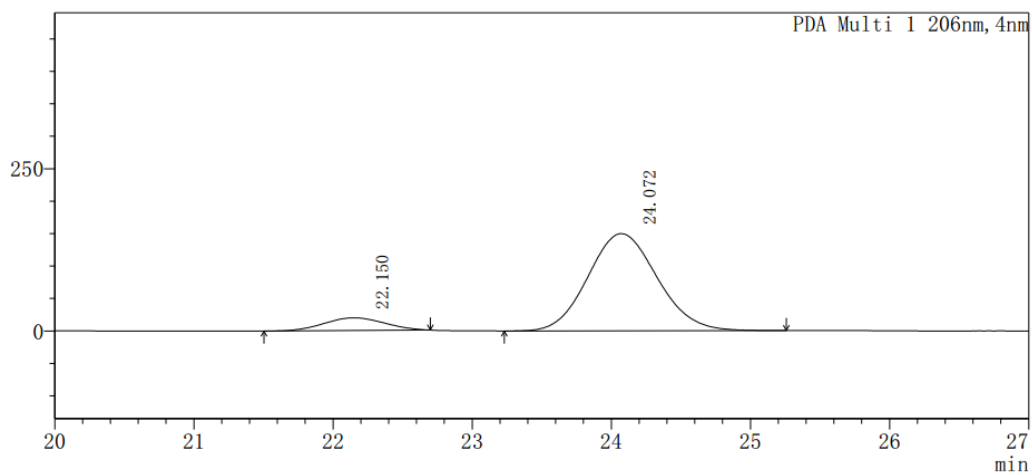

<Peak Results>

PDA Ch1 206nm

| Index | Time/min | Height/mAU | Quantity/Area | Area %/% |
|-------|----------|------------|---------------|----------|
| 1     | 22.150   | 19585      | 594575        | 10.288   |
| 2     | 24.072   | 149742     | 5184733       | 89.712   |

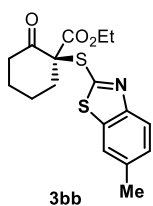

mAU

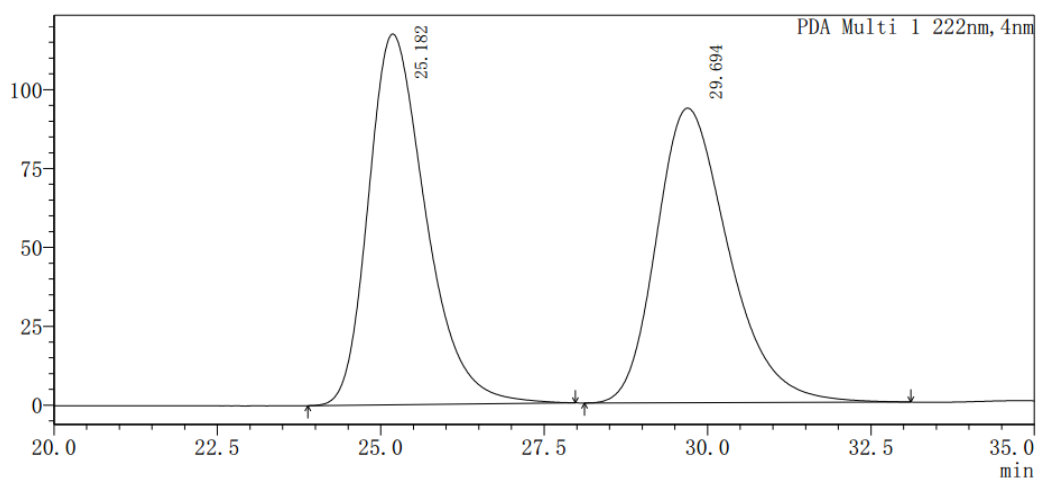

<Peak Results>

PDA Ch1 222nm

| Index | Time/min | Height/mAU | Quantity/Area | Area %/% |
|-------|----------|------------|---------------|----------|
| 1     | 25.182   | 117549     | 7196131       | 50.004   |
| 2     | 29.694   | 93406      | 7195025       | 49.996   |

mAU

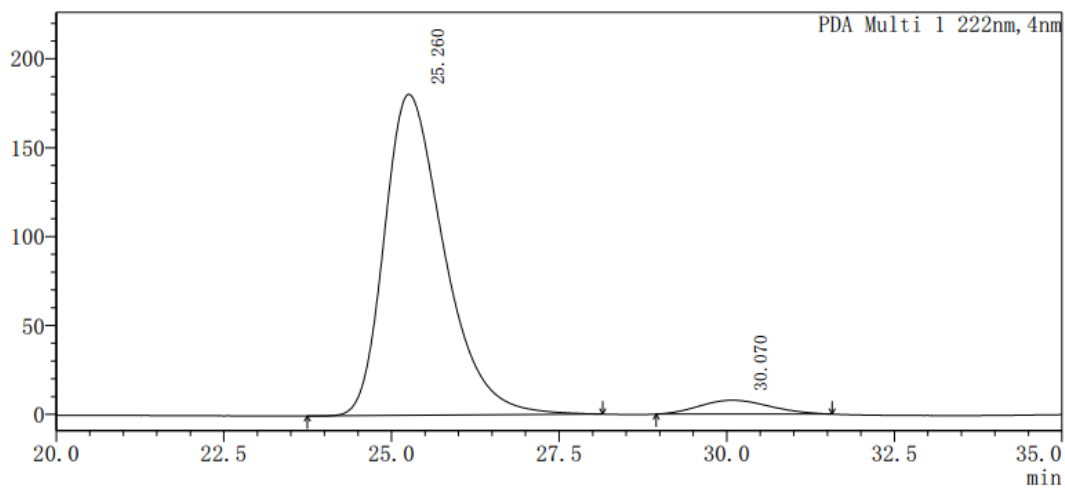

<Peak Results>

PDA Ch1 222nm

| Index | Time/min | Height/mAU | Quantity/Area | Area %/% |
|-------|----------|------------|---------------|----------|
| 1     | 25.260   | 180612     | 11218955      | 95.164   |
| 2     | 30.070   | 7804       | 570145        | 4.836    |



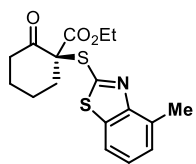

**3bc**

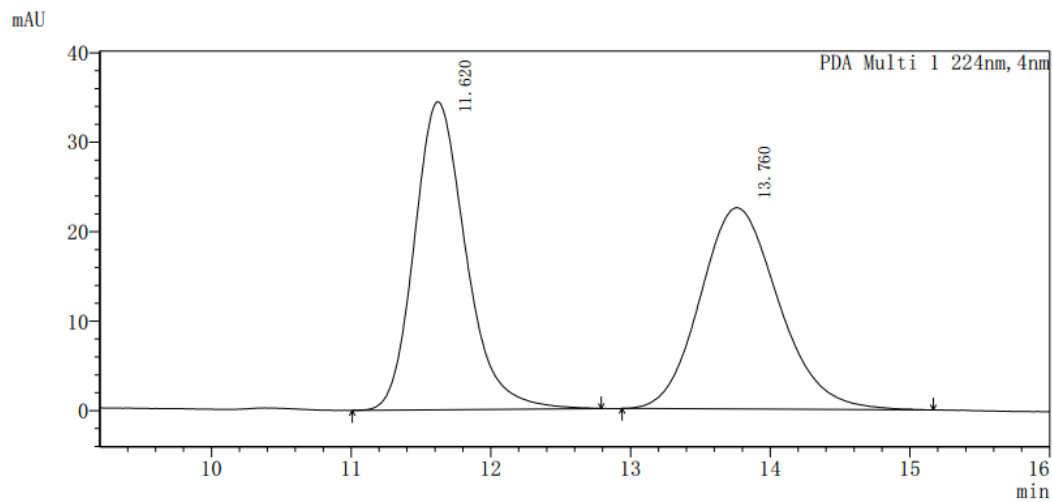

<Peak Results>

PDA Ch1 224nm

| Index | Time/min | Height/mAU | Quantity/Area | Area %/ % |
|-------|----------|------------|---------------|-----------|
| 1     | 11.620   | 34424      | 881733        | 50.072    |
| 2     | 13.760   | 22497      | 879195        | 49.928    |

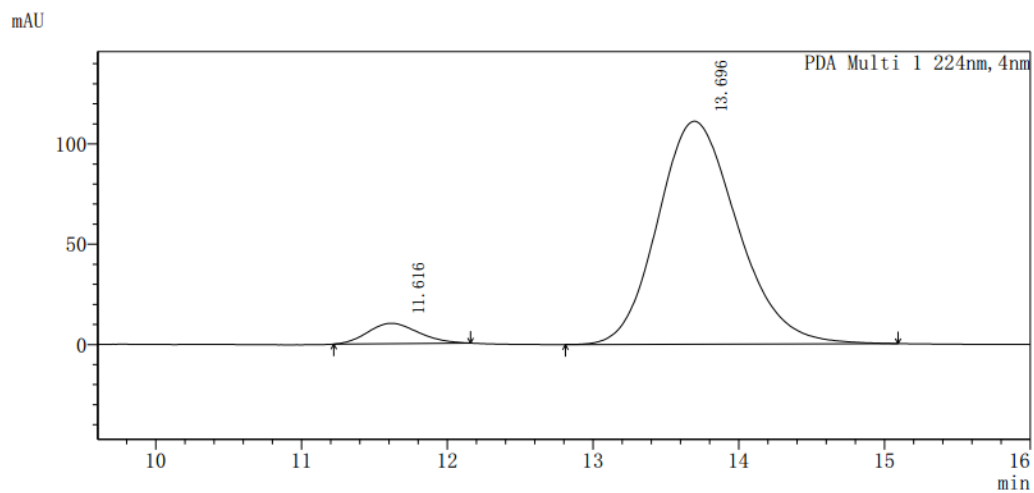

<Peak Results>

PDA Ch1 224nm

| Index | Time/min | Height/mAU | Quantity/Area | Area %/ % |
|-------|----------|------------|---------------|-----------|
| 1     | 11.616   | 10143      | 245199        | 5.470     |
| 2     | 13.696   | 111117     | 4237590       | 94.530    |

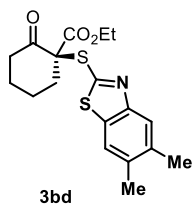

mAU

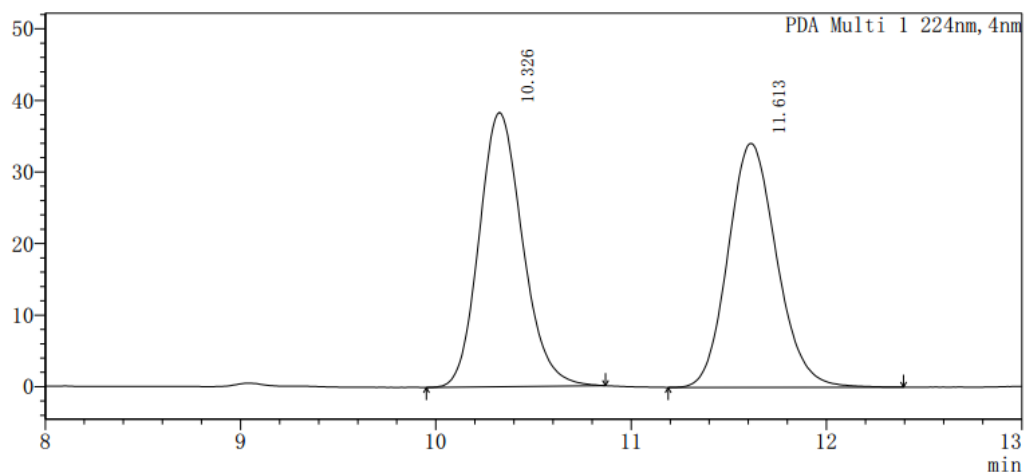

<Peak Results>

PDA Ch1 224nm

| Index | Time/min | Height/mAU | Quantity/Area | Area %/% |
|-------|----------|------------|---------------|----------|
| 1     | 10.326   | 38322      | 591728        | 50.044   |
| 2     | 11.613   | 34078      | 590696        | 49.956   |

mAU

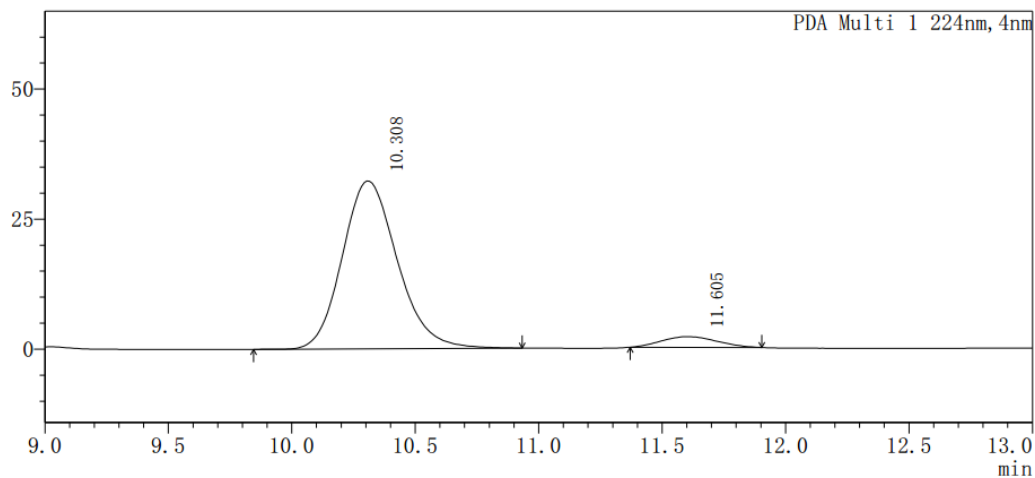

<Peak Results>

PDA Ch1 224nm

| Index | Time/min | Height/mAU | Quantity/Area | Area %/% |
|-------|----------|------------|---------------|----------|
| 1     | 10.308   | 32256      | 500159        | 93.981   |
| 2     | 11.605   | 2056       | 32030         | 6.019    |

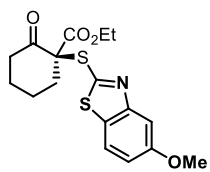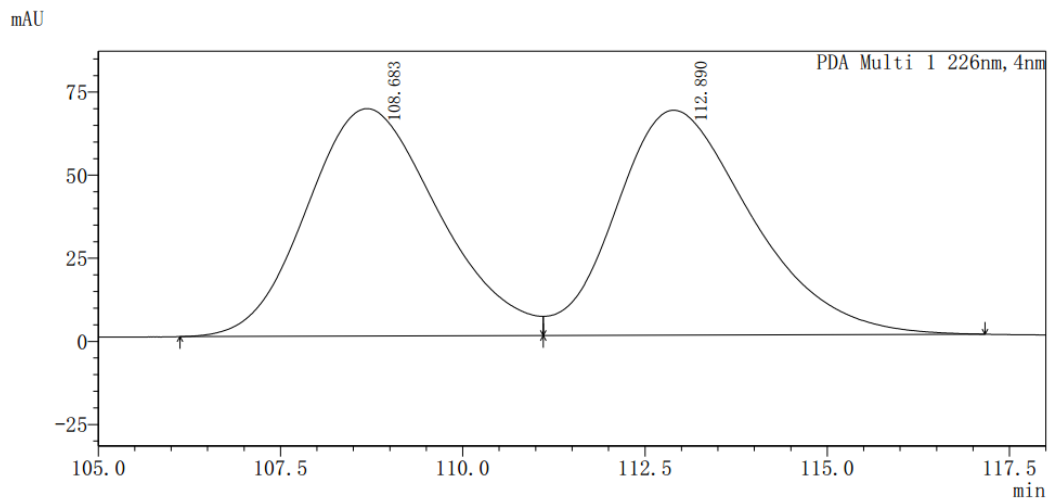

<Peak Results>

PDA Ch1 226nm

| Index | Time/min | Height/mAU | Quantity/Area | Area %/% |
|-------|----------|------------|---------------|----------|
| 1     | 108.683  | 68443      | 8624886       | 49.536   |
| 2     | 112.890  | 67685      | 8786292       | 50.464   |

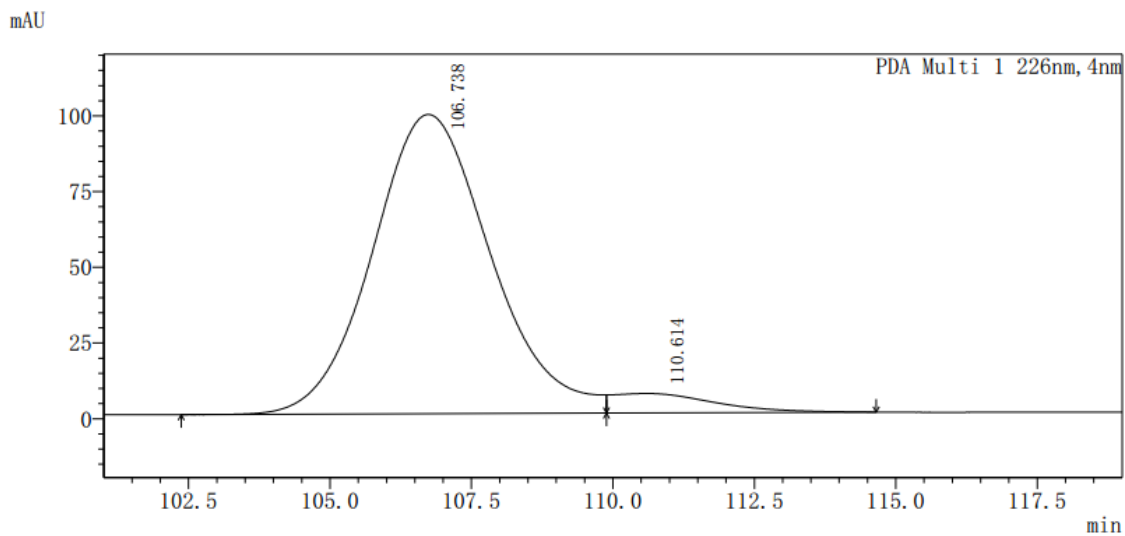

<Peak Results>

PDA Ch1 226nm

| Index | Time/min | Height/mAU | Quantity/Area | Area %/% |
|-------|----------|------------|---------------|----------|
| 1     | 106.738  | 98803      | 14350802      | 94.701   |
| 2     | 110.614  | 6425       | 802974        | 5.299    |

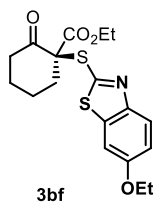

mAU

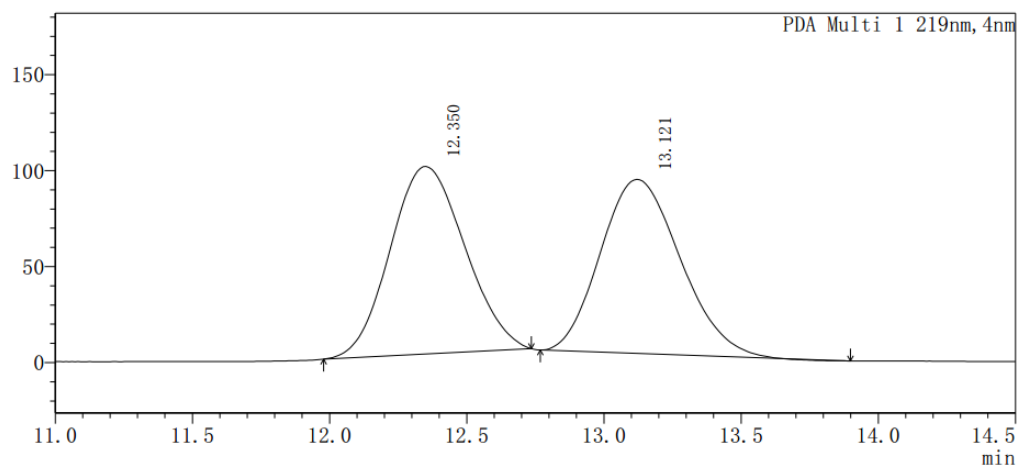

<Peak Results>

PDA Ch1 219nm

| Index | Time/min | Height/mAU | Quantity/Area | Area %/% |
|-------|----------|------------|---------------|----------|
| 1     | 12.350   | 97793      | 1853583       | 50.247   |
| 2     | 13.121   | 90683      | 1835358       | 49.753   |

mAU

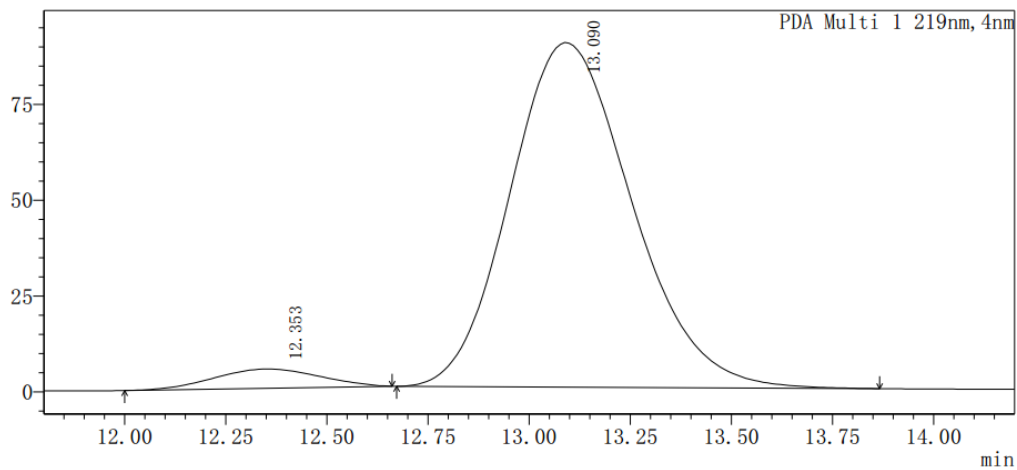

<Peak Results>

PDA Ch1 219nm

| Index | Time/min | Height/mAU | Quantity/Area | Area %/% |
|-------|----------|------------|---------------|----------|
| 1     | 12.353   | 5017       | 91378         | 4.623    |
| 2     | 13.090   | 89904      | 1885362       | 95.377   |

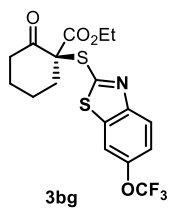

mAU

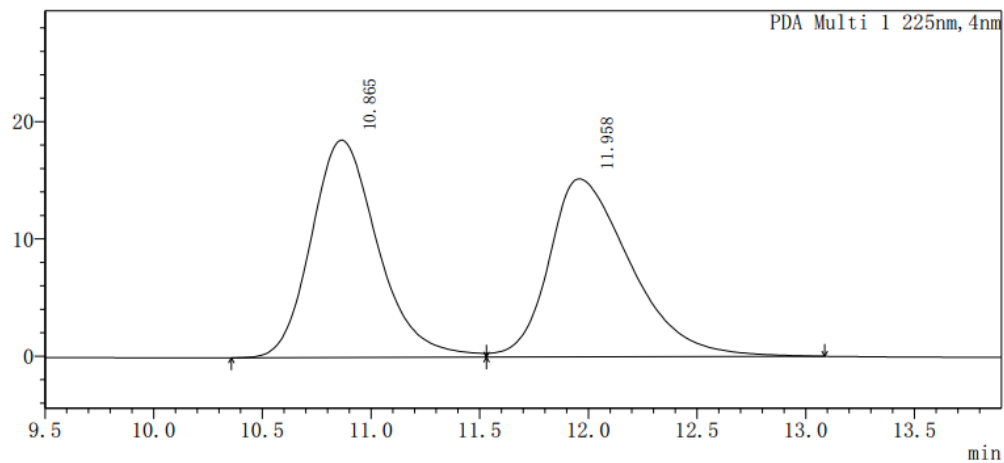

<Peak Results>

PDA Ch1 225nm

| Index | Time/min | Height/mAU | Quantity/Area | Area %/% |
|-------|----------|------------|---------------|----------|
| 1     | 10.865   | 18537      | 395651        | 49.828   |
| 2     | 11.958   | 15187      | 398381        | 50.172   |

mAU

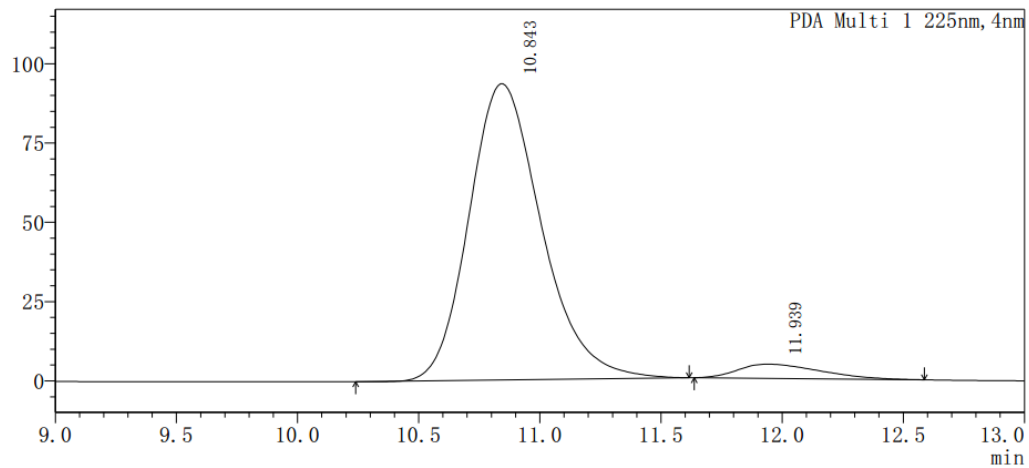

<Peak Results>

PDA Ch1 225nm

| Index | Time/min | Height/mAU | Quantity/Area | Area %/% |
|-------|----------|------------|---------------|----------|
| 1     | 10.843   | 93413      | 1944909       | 94.857   |
| 2     | 11.939   | 4467       | 105457        | 5.143    |

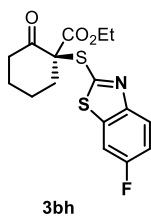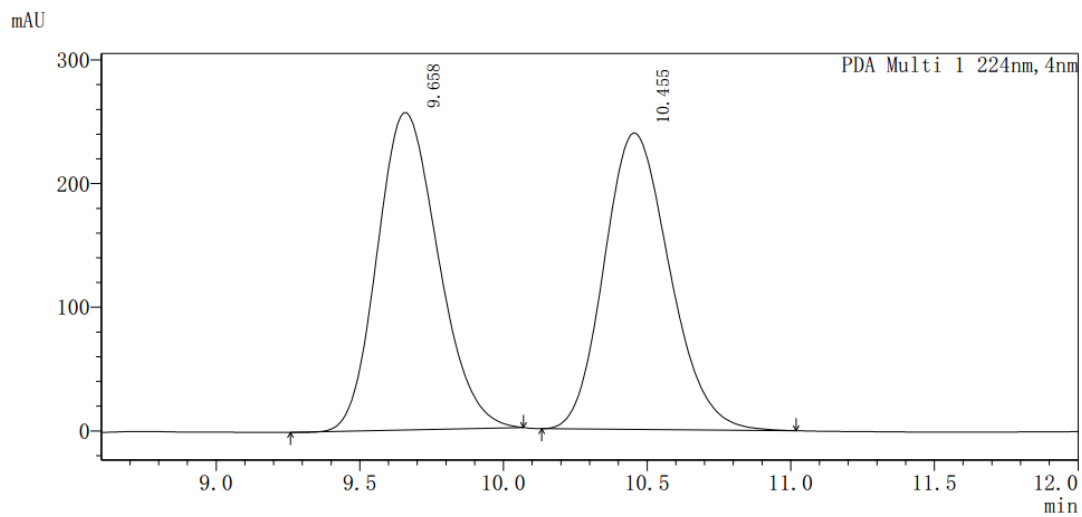

<Peak Results>

PDA Ch1 224nm

| Index | Time/min | Height/mAU | Quantity/Area | Area %/% |
|-------|----------|------------|---------------|----------|
| 1     | 9.658    | 256717     | 3799393       | 49.989   |
| 2     | 10.455   | 239786     | 3801125       | 50.011   |

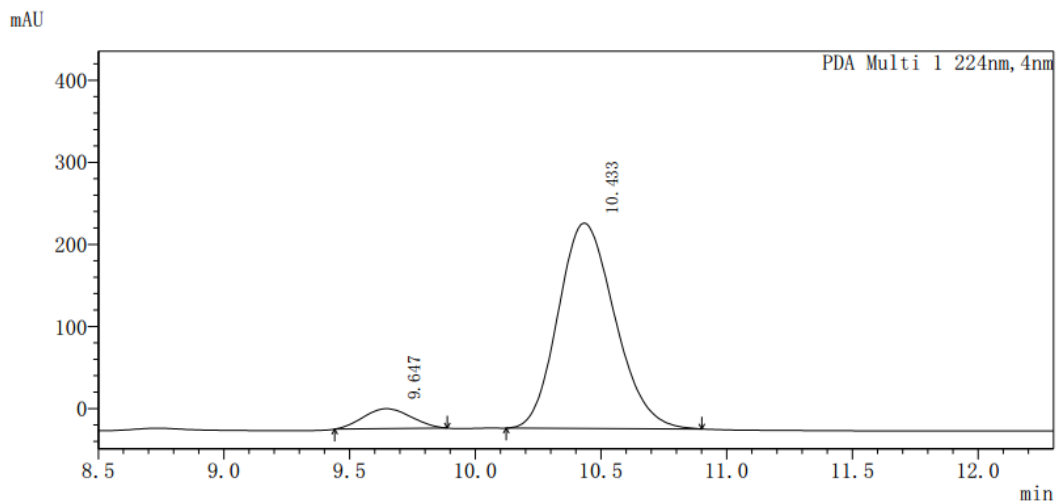

<Peak Results>

PDA Ch1 224nm

| Index | Time/min | Height/mAU | Quantity/Area | Area %/% |
|-------|----------|------------|---------------|----------|
| 1     | 9.647    | 24278      | 321586        | 7.563    |
| 2     | 10.433   | 250416     | 3930638       | 92.437   |

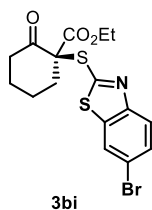

mAU

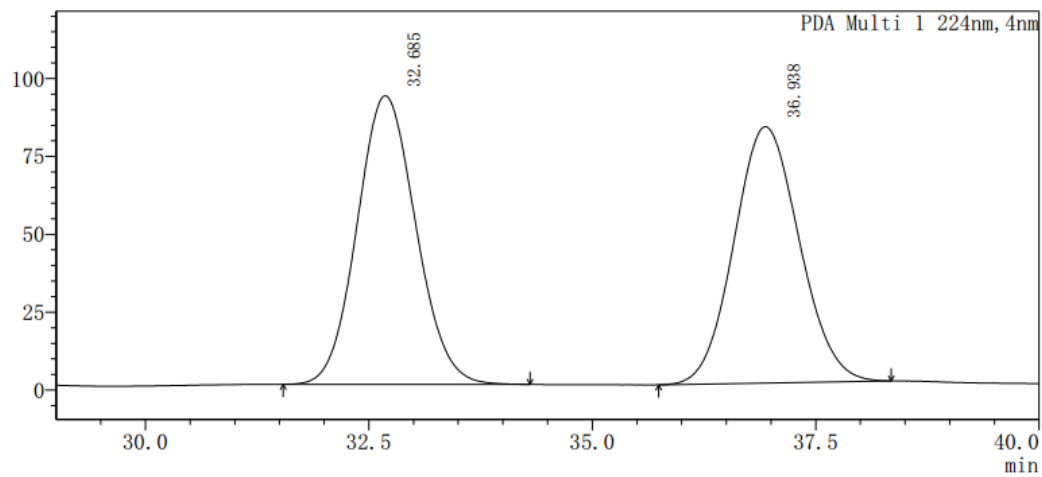

<Peak Results>

PDA Ch1 224nm

| Index | Time/min | Height/mAU | Quantity/Area | Area %/ % |
|-------|----------|------------|---------------|-----------|
| 1     | 32.685   | 92609      | 4249499       | 50.380    |
| 2     | 36.938   | 82276      | 4185462       | 49.620    |

mAU

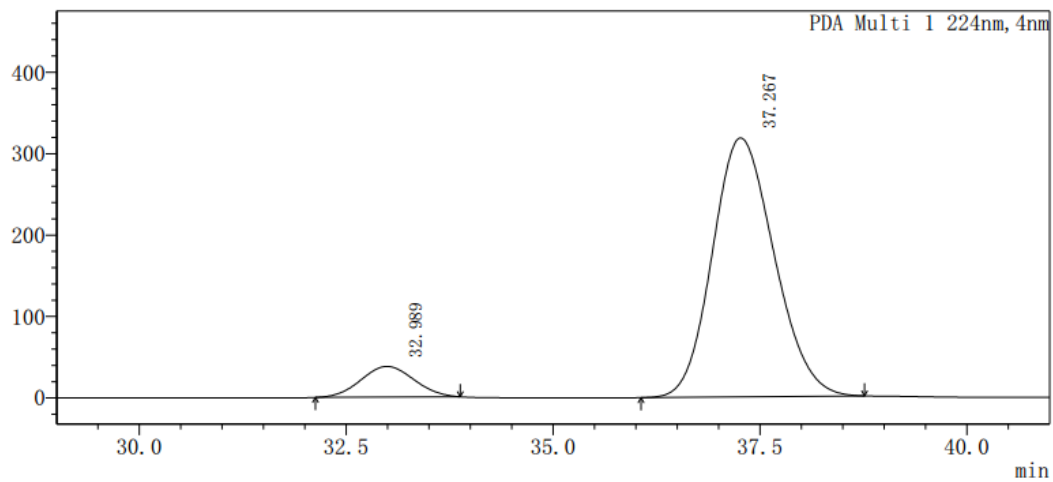

<Peak Results>

PDA Ch1 224nm

| Index | Time/min | Height/mAU | Quantity/Area | Area %/ % |
|-------|----------|------------|---------------|-----------|
| 1     | 32.989   | 37689      | 1679381       | 9.217     |
| 2     | 37.267   | 317960     | 16541660      | 90.783    |

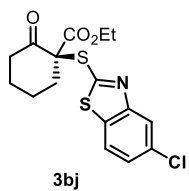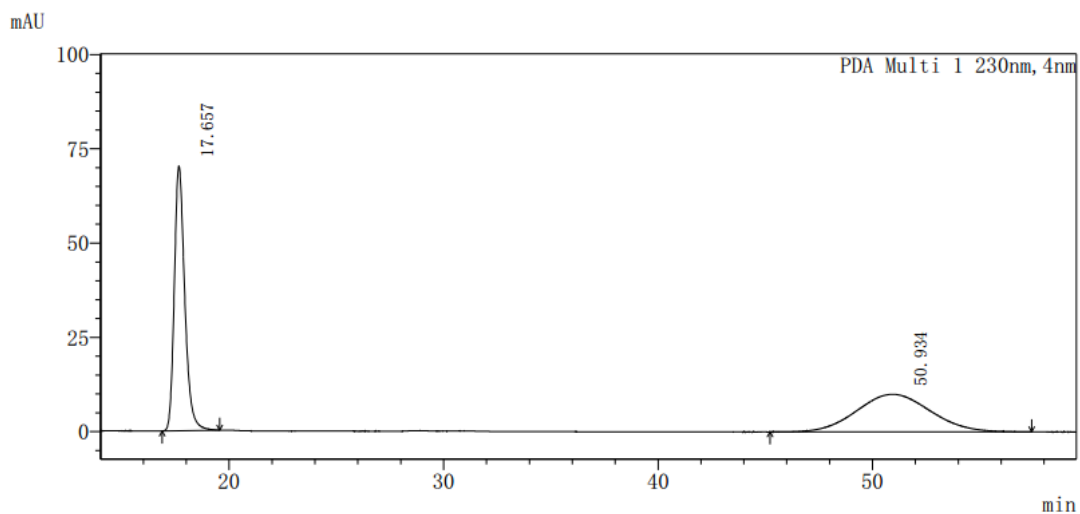

<Peak Results>

PDA Ch1 230nm

| Index | Time/min | Height/mAU | Quantity/Area | Area %/ % |
|-------|----------|------------|---------------|-----------|
| 1     | 17.657   | 70179      | 2380349       | 49.872    |
| 2     | 50.934   | 9975       | 2392532       | 50.128    |

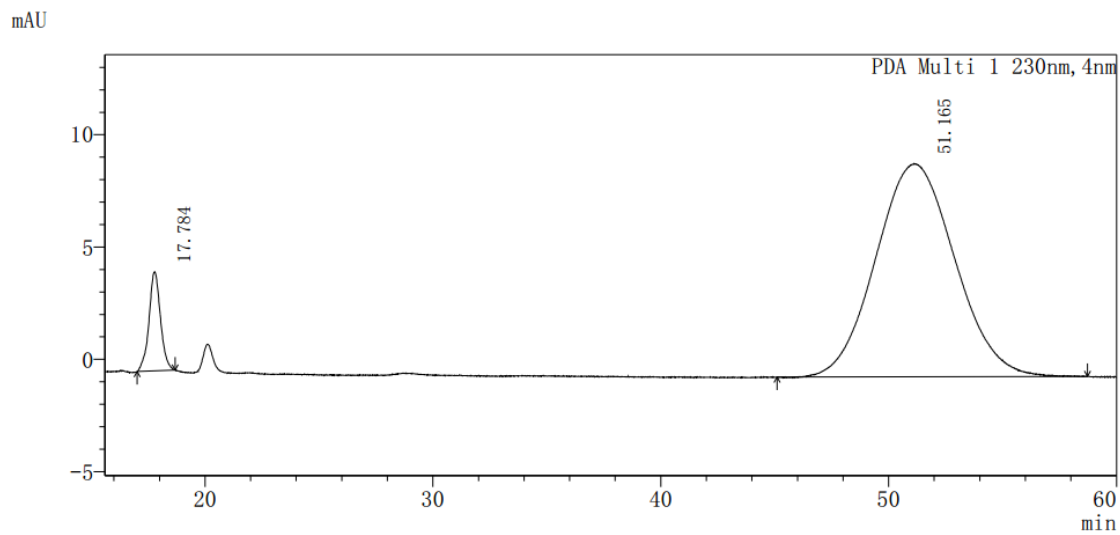

<Peak Results>

PDA Ch1 230nm

| Index | Time/min | Height/mAU | Quantity/Area | Area %/ % |
|-------|----------|------------|---------------|-----------|
| 1     | 17.784   | 4408       | 155080        | 6.347     |
| 2     | 51.165   | 9487       | 2288394       | 93.653    |



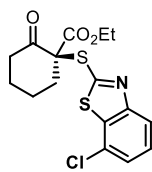

3bk

mAU

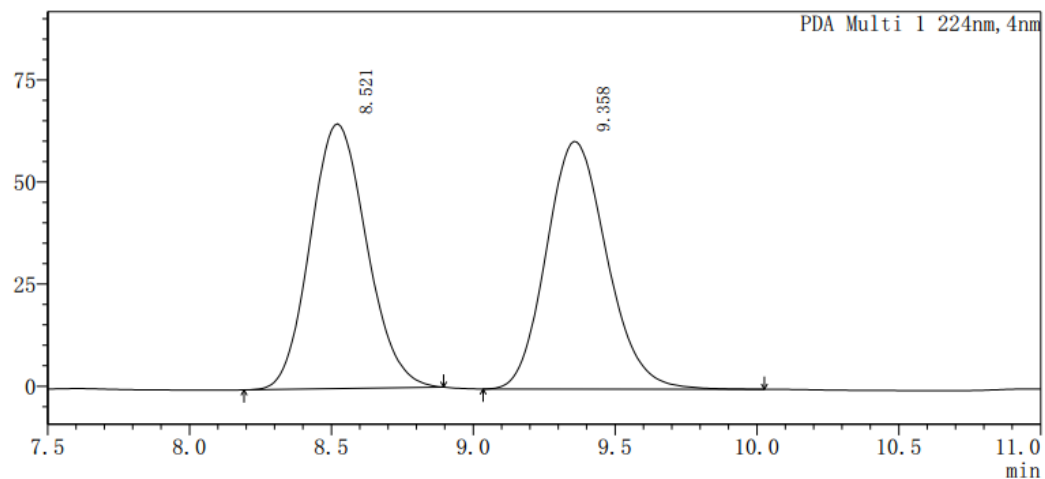

<Peak Results>

PDA Ch1 224nm

| Index | Time/min | Height/mAU | Quantity/Area | Area %/ % |
|-------|----------|------------|---------------|-----------|
| 1     | 8.521    | 64875      | 900521        | 49.963    |
| 2     | 9.358    | 60646      | 901851        | 50.037    |

mAU

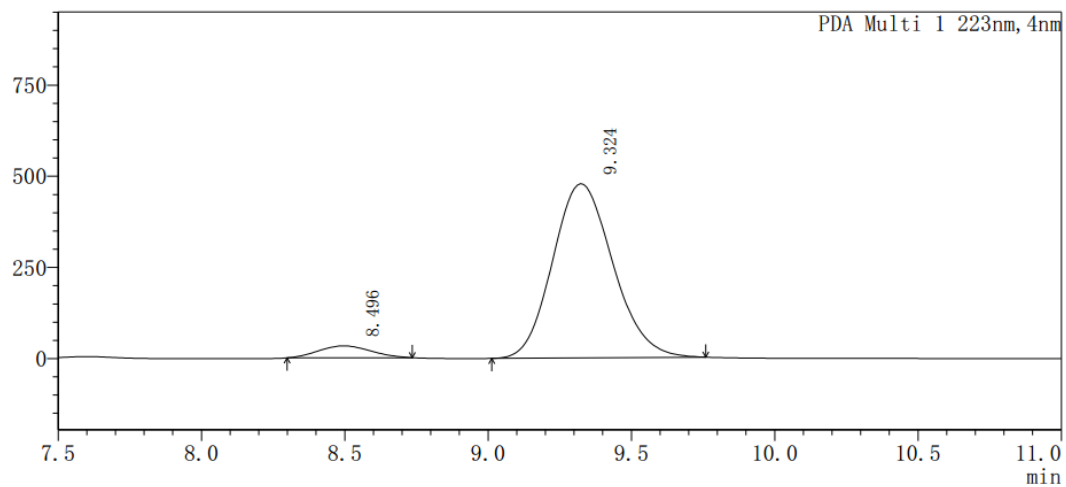

<Peak Results>

PDA Ch1 223nm

| Index | Time/min | Height/mAU | Quantity/Area | Area %/ % |
|-------|----------|------------|---------------|-----------|
| 1     | 8.496    | 32614      | 414398        | 5.595     |
| 2     | 9.324    | 477723     | 6991934       | 94.405    |

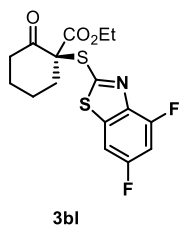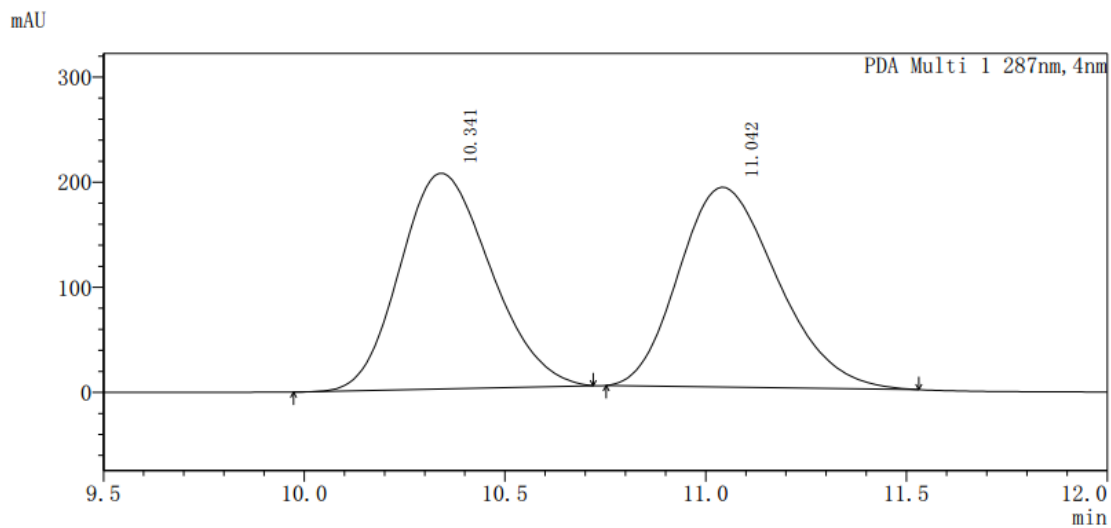

<Peak Results>

PDA Ch1 287nm

| Index | Time/min | Height/mAU | Quantity/Area | Area %/% |
|-------|----------|------------|---------------|----------|
| 1     | 10.341   | 205020     | 3234859       | 49.809   |
| 2     | 11.042   | 190197     | 3259711       | 50.191   |

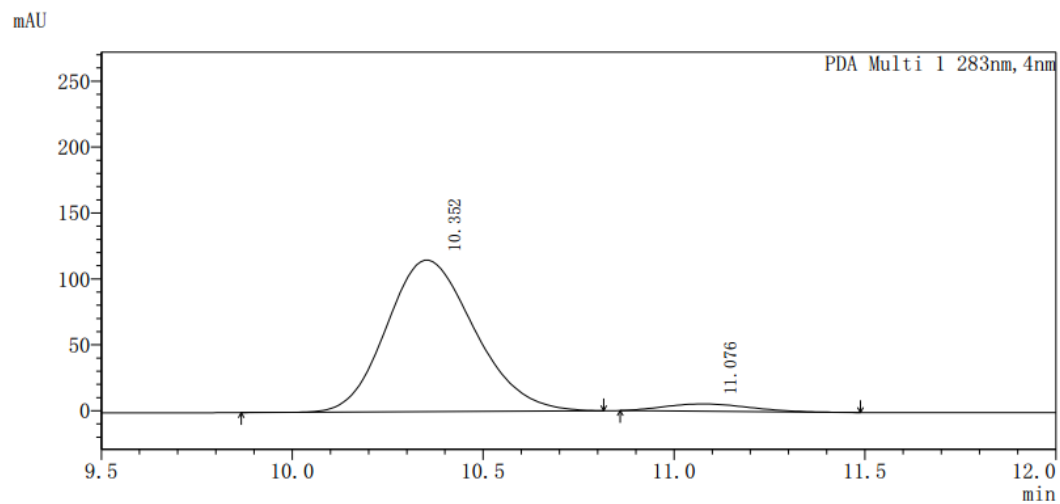

<Peak Results>

PDA Ch1 283nm

| Index | Time/min | Height/mAU | Quantity/Area | Area %/% |
|-------|----------|------------|---------------|----------|
| 1     | 10.352   | 114877     | 1841517       | 95.578   |
| 2     | 11.076   | 5551       | 85200         | 4.422    |

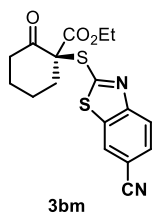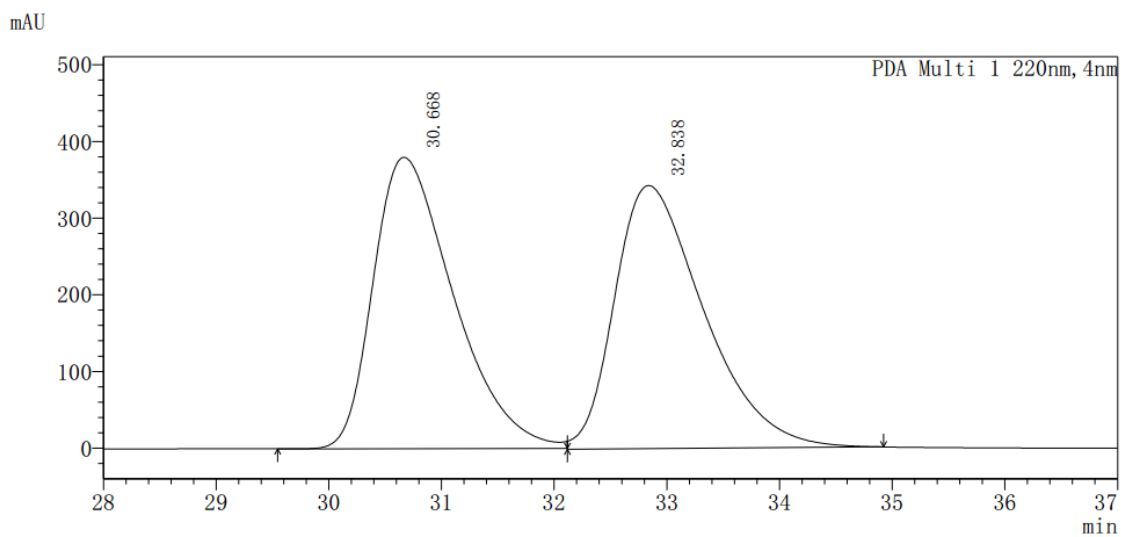

<Peak Results>

PDA Ch1 220nm

| Index | Time/min | Height/mAU | Quantity/Area | Area %/% |
|-------|----------|------------|---------------|----------|
| 1     | 30.668   | 380149     | 18853336      | 49.967   |
| 2     | 32.838   | 343143     | 18878448      | 50.033   |

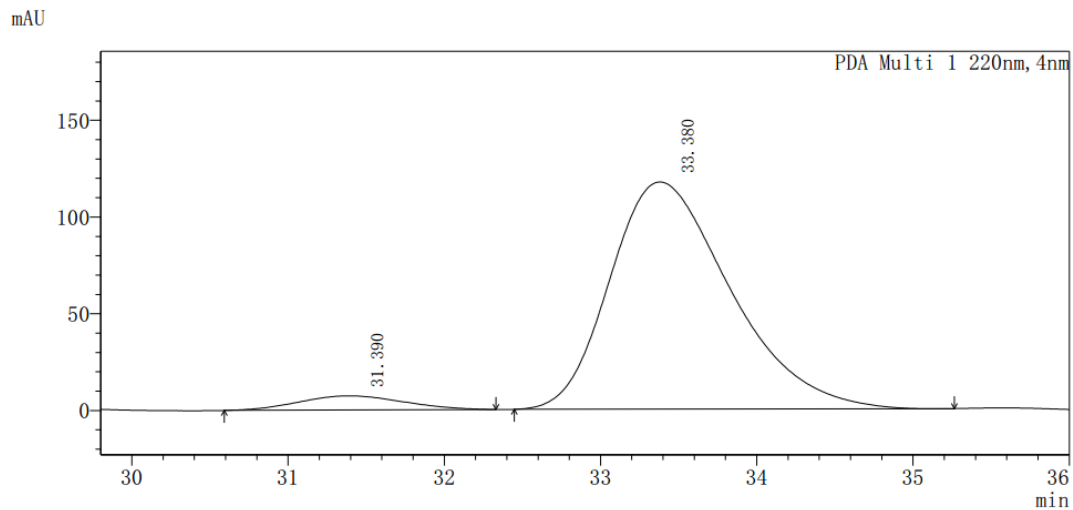

<Peak Results>

PDA Ch1 220nm

| Index | Time/min | Height/mAU | Quantity/Area | Area %/% |
|-------|----------|------------|---------------|----------|
| 1     | 31.390   | 7330       | 341917        | 5.152    |
| 2     | 33.380   | 117412     | 6294566       | 94.848   |

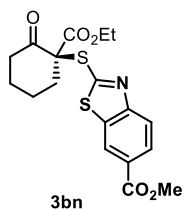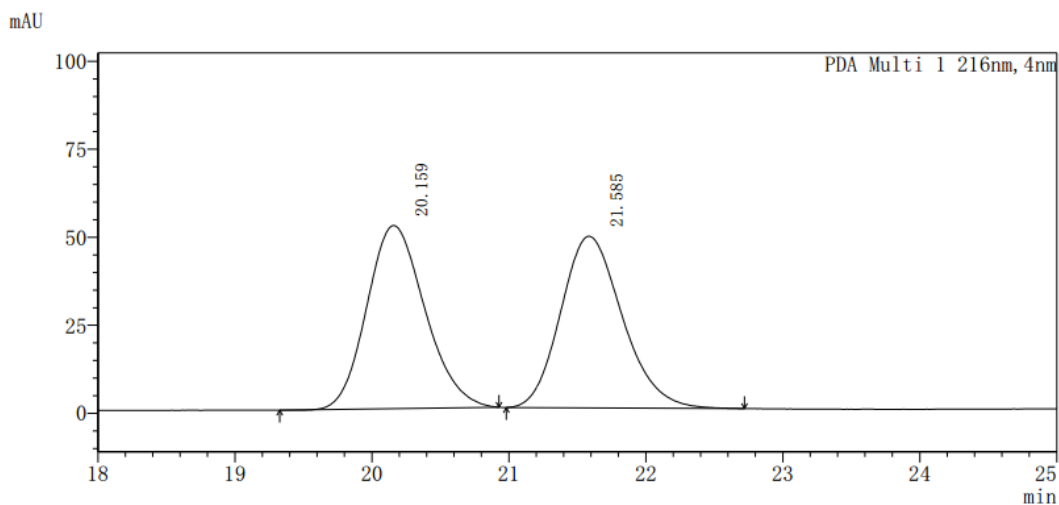

<Peak Results>

PDA Ch1 216nm

| Index | Time/min | Height/mAU | Quantity/Area | Area %/% |
|-------|----------|------------|---------------|----------|
| 1     | 20.159   | 52023      | 1535761       | 50.161   |
| 2     | 21.585   | 48718      | 1525887       | 49.839   |

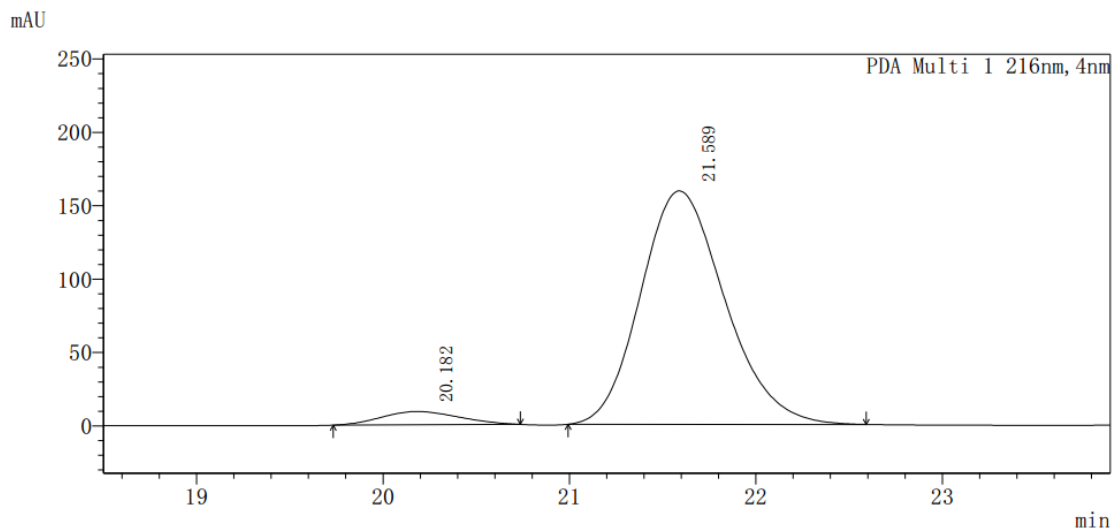

<Peak Results>

PDA Ch1 216nm

| Index | Time/min | Height/mAU | Quantity/Area | Area %/% |
|-------|----------|------------|---------------|----------|
| 1     | 20.182   | 9085       | 260965        | 4.960    |
| 2     | 21.589   | 159076     | 5000591       | 95.040   |

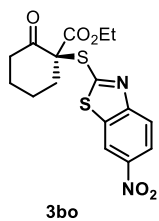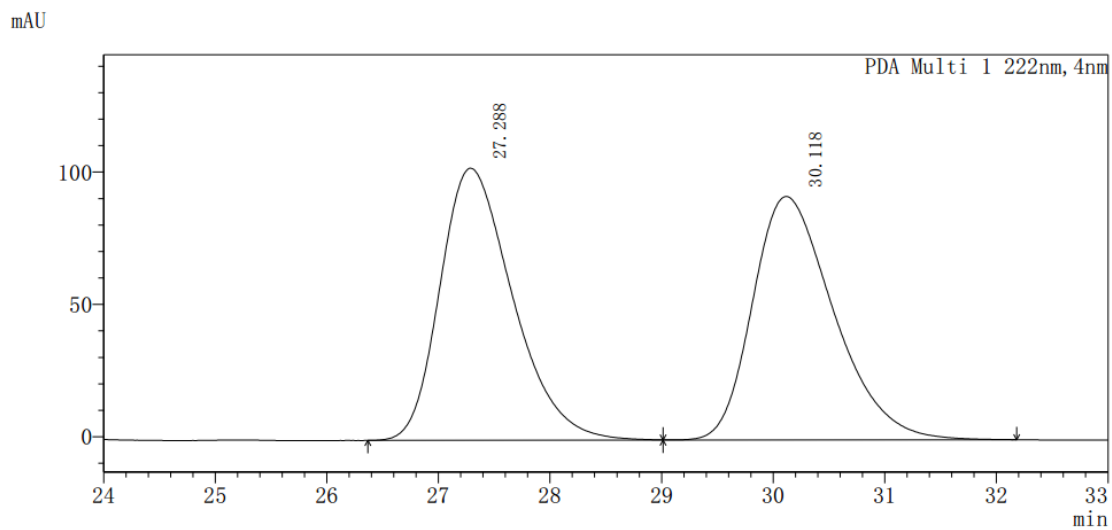

<Peak Results>

PDA Ch1 222nm

| Index | Time/min | Height/mAU | Quantity/Area | Area %/% |
|-------|----------|------------|---------------|----------|
| 1     | 27.288   | 102836     | 4668741       | 50.097   |
| 2     | 30.118   | 91978      | 4650645       | 49.903   |

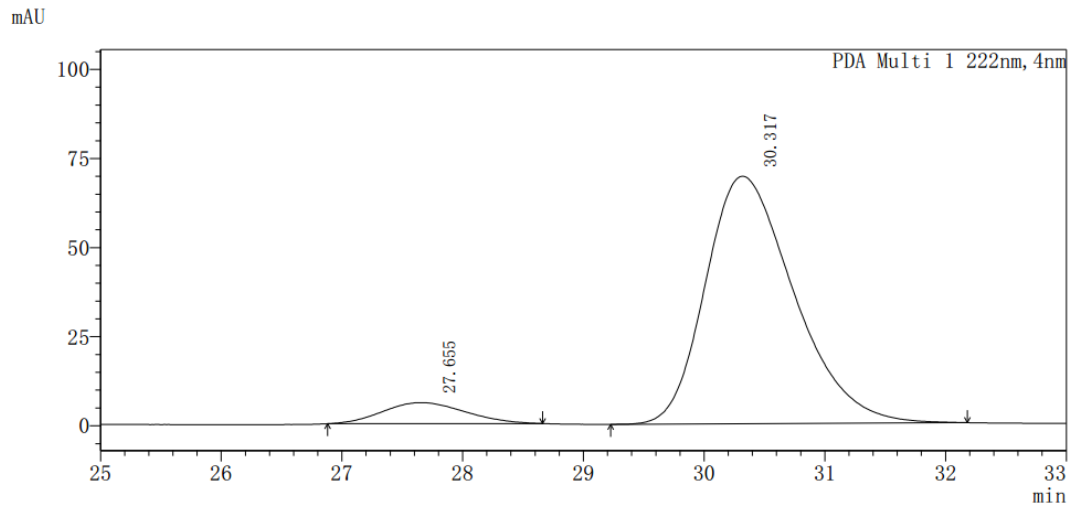

<Peak Results>

PDA Ch1 222nm

| Index | Time/min | Height/mAU | Quantity/Area | Area %/% |
|-------|----------|------------|---------------|----------|
| 1     | 27.655   | 5894       | 281736        | 7.375    |
| 2     | 30.317   | 69456      | 3538230       | 92.625   |

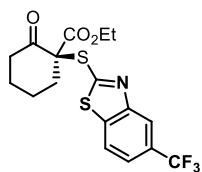

3bp

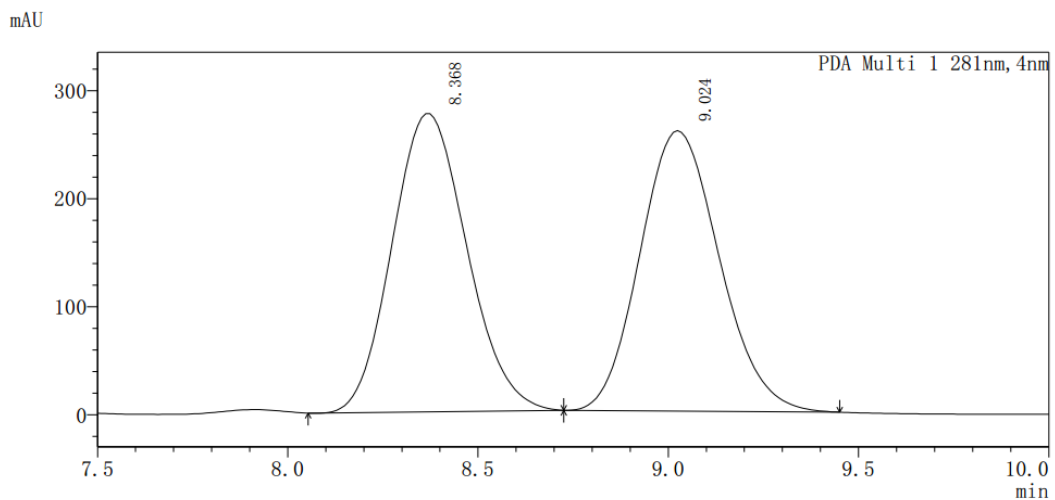

<Peak Results>

PDA Ch1 281nm

| Index | Time/min | Height/mAU | Quantity/Area | Area %/ % |
|-------|----------|------------|---------------|-----------|
| 1     | 8.368    | 275968     | 3769841       | 50.036    |
| 2     | 9.024    | 259601     | 3764397       | 49.964    |

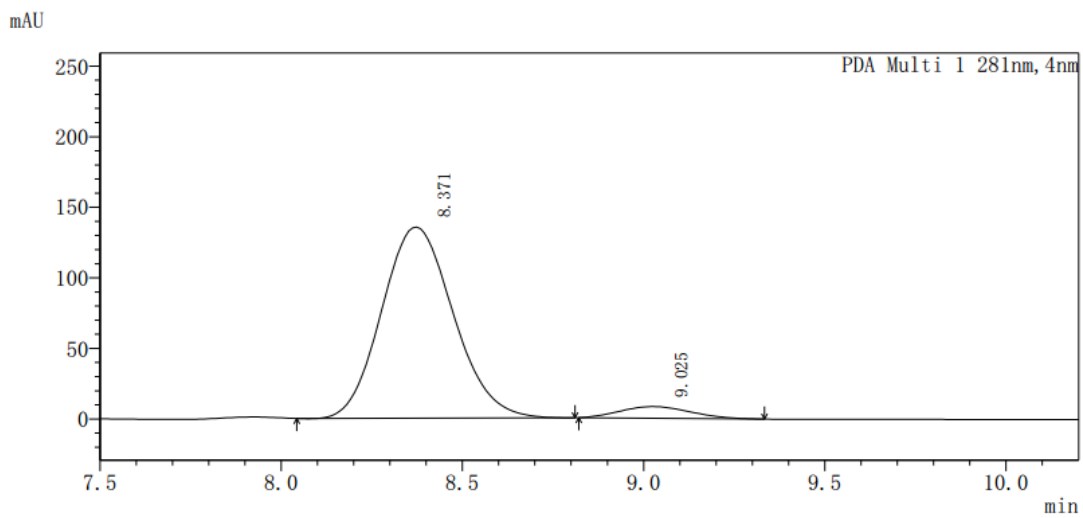

<Peak Results>

PDA Ch1 281nm

| Index | Time/min | Height/mAU | Quantity/Area | Area %/ % |
|-------|----------|------------|---------------|-----------|
| 1     | 8.371    | 135518     | 1862480       | 94.354    |
| 2     | 9.025    | 8270       | 111441        | 5.646     |

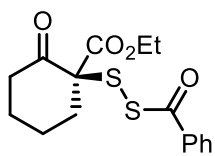

mAU

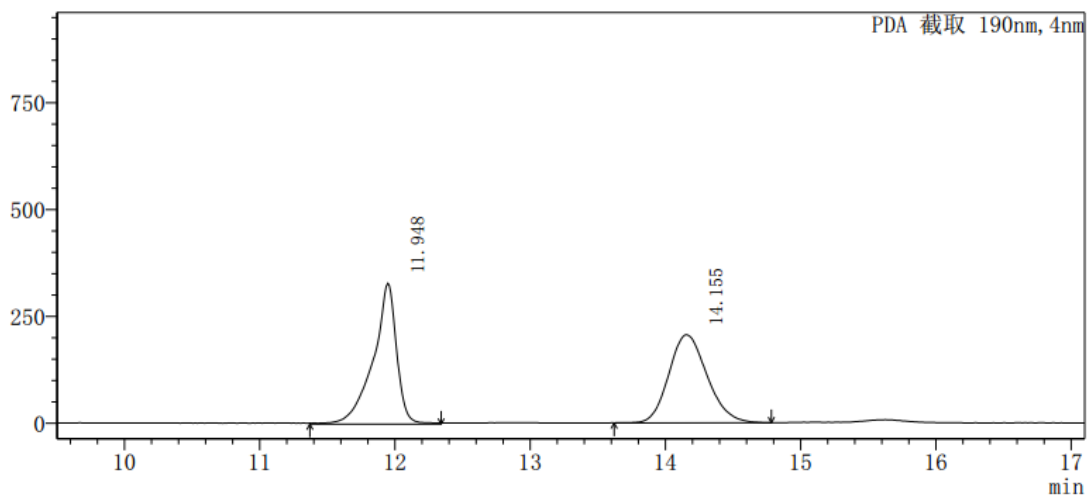

<Peak Results>

PDA Ch1 240nm

| Index | Time/min | Height/mAU | Quantity/Area | Area %/% |
|-------|----------|------------|---------------|----------|
| 1     | 11.948   | 327069     | 3837623       | 49.442   |
| 2     | 14.156   | 202379     | 3924318       | 50.558   |

mAU

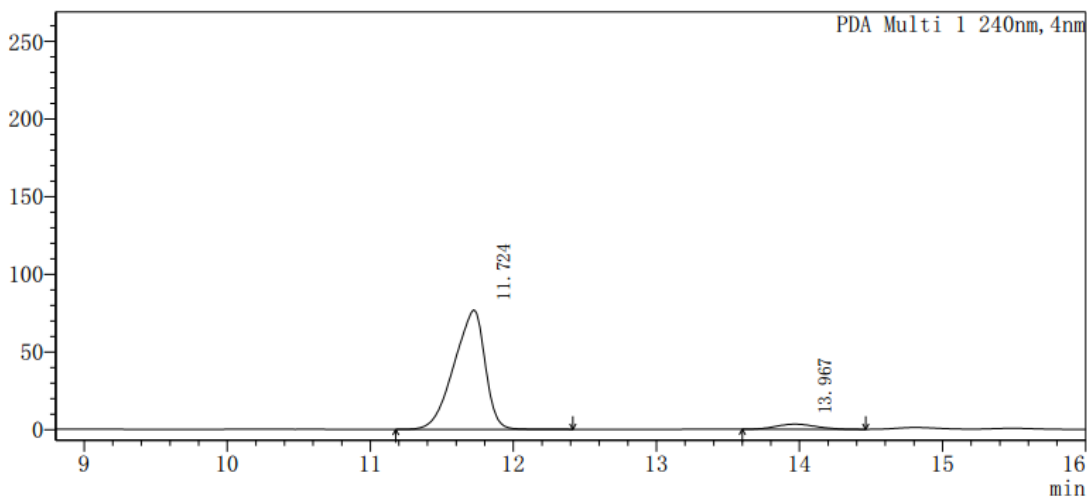

<Peak Results>

PDA Ch1 240nm

| Index | Time/min | Height/mAU | Quantity/Area | Area %/% |
|-------|----------|------------|---------------|----------|
| 1     | 11.724   | 76791      | 1155570       | 94.837   |
| 2     | 13.967   | 3295       | 62912         | 5.163    |

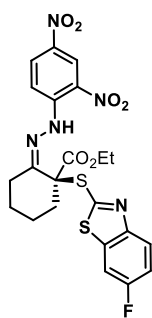

**3bh-1**

mAU

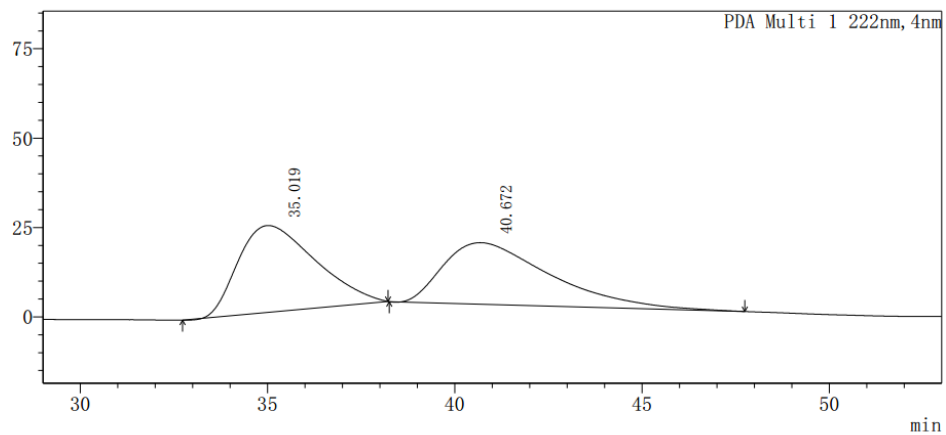

<Peak Results>

PDA Ch1 222nm

| Index | Time/min | Height/mAU | Quantity/Area | Area %/% |
|-------|----------|------------|---------------|----------|
| 1     | 35.019   | 24291      | 3477252       | 50.443   |
| 2     | 40.672   | 17200      | 3416223       | 49.557   |

mAU

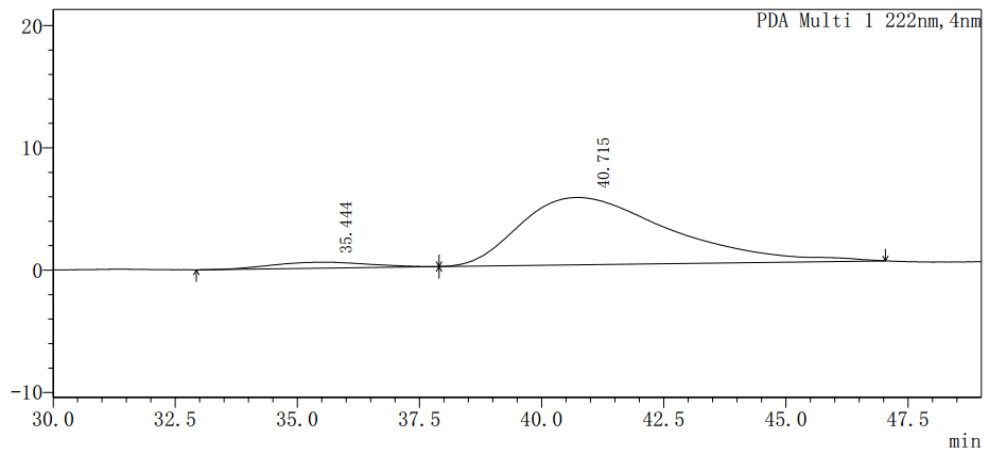

<Peak Results>

PDA Ch1 222nm

| Index | Time/min | Height/mAU | Quantity/Area | Area %/% |
|-------|----------|------------|---------------|----------|
| 1     | 35.444   | 489        | 65712         | 5.289    |
| 2     | 40.715   | 5505       | 1176757       | 94.711   |
